# Supplementary material for: Intramolecular cyclization reactions of arylpropargyl amides of electron-deficient α,β-alkenyl carboxylates and related compounds
Source: Royal Society of Chemistry journal article supplement (doi:10.1039/d3ob00129f), 2023-01-01
Supplement: d3ob00129f2.pdf [file d3ob00129f2.pdf]

II. Copies of the 2D NOESY spectra

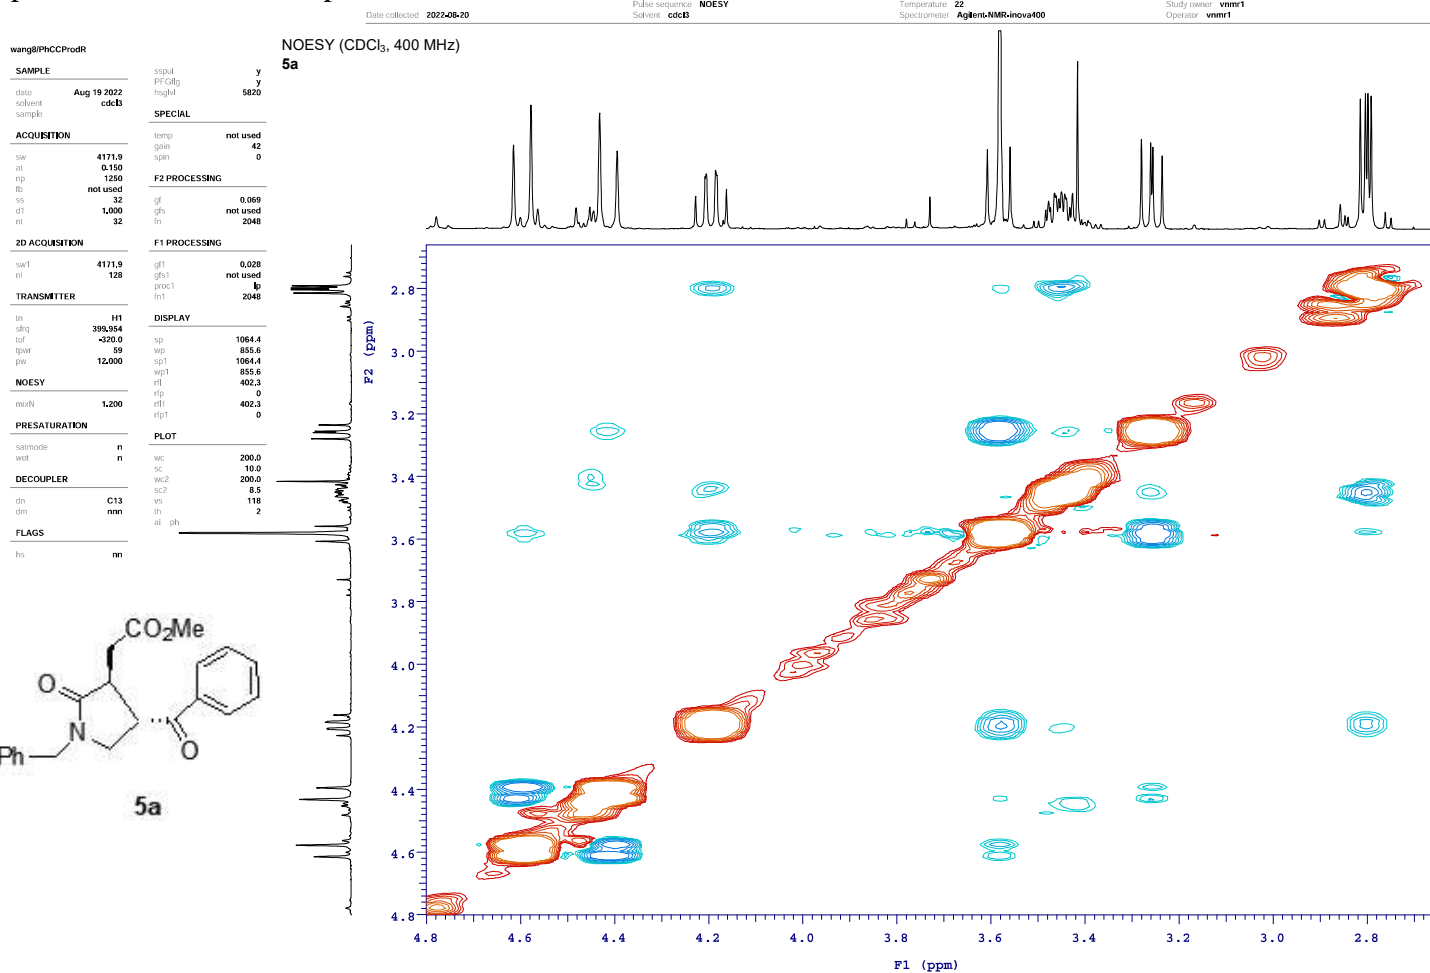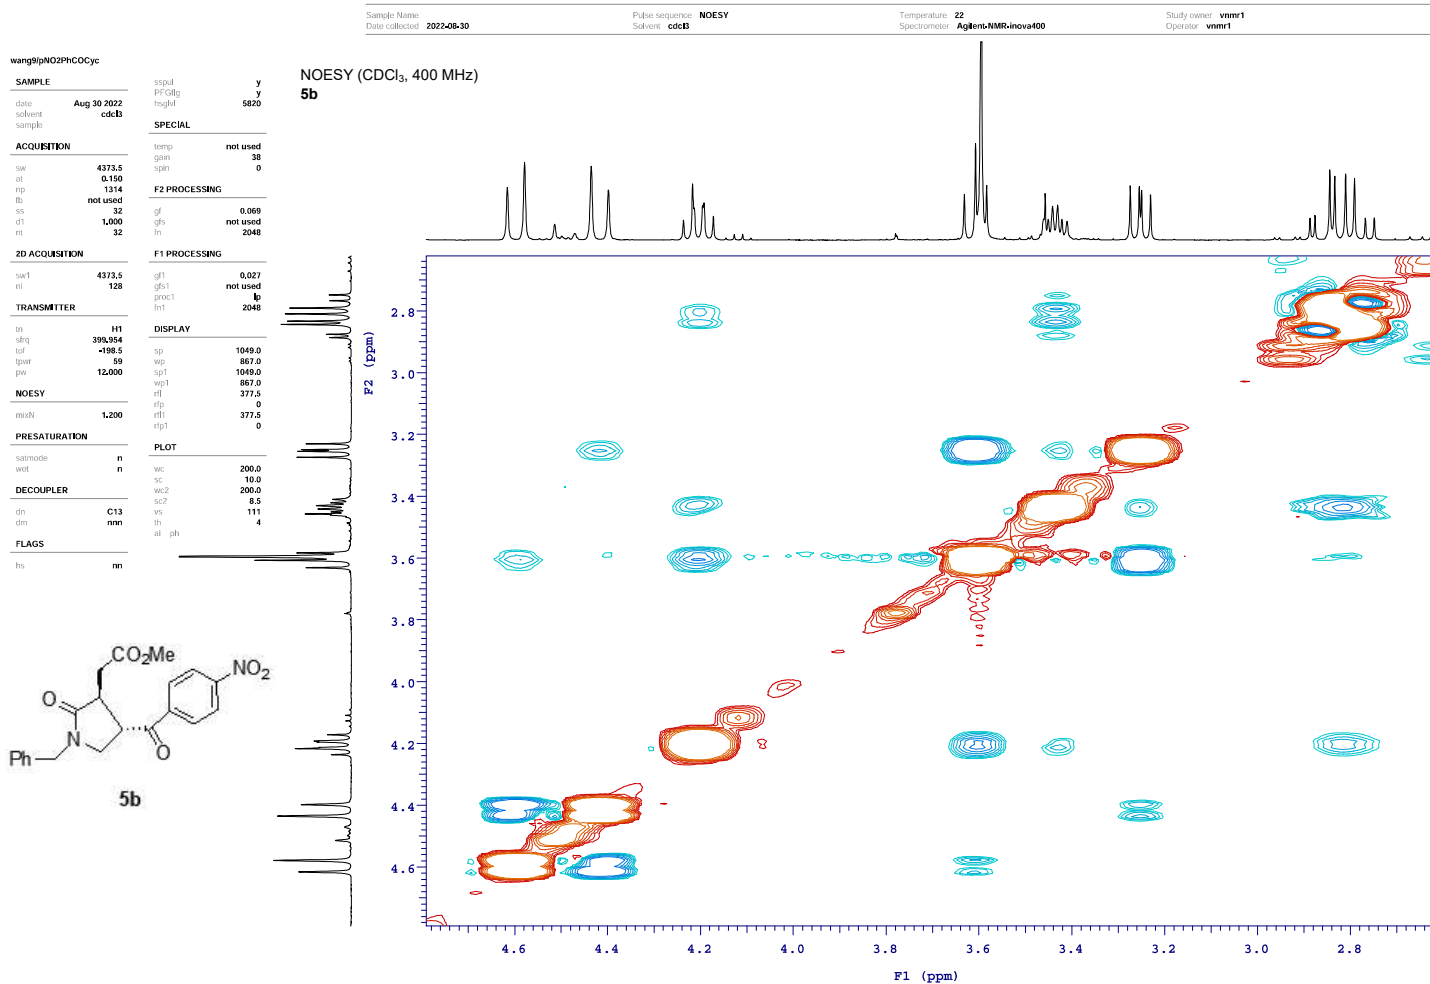

SSS1

wang@NO2PhCO2Cyc

| SAMPLE         |            | ssq4          | y        |
|----------------|------------|---------------|----------|
| date           | Sep 2 2022 | PF Gltg       | y        |
| solvent        | cdcl3      | hsghl         | 5820     |
| sample         |            |               |          |
| ACQUISITION    |            | SPECIAL       |          |
| temp           | not used   |               |          |
| gain           | 38         |               |          |
| spin           | 0          |               |          |
| F2 PROCESSING  |            |               |          |
| gf             | 0.069      |               |          |
| gfs            | not used   |               |          |
| fn             | 2048       |               |          |
| 2D ACQUISITION |            | F1 PROCESSING |          |
| sw1            | 4001.6     | gf1           | 0.029    |
| nt             | 128        | gfs1          | not used |
|                |            | proc1         | lp       |
|                |            | int           | 2048     |
| TRANSMITTER    |            | DISPLAY       |          |
| tn             | H1         | sp            | 1012.0   |
| slq            | 390.954    | wp            | 906.6    |
| tdf            | -337.7     | sp11          | 1012.0   |
| tpwr           | 59         | wp1           | 906.6    |
| pw             | 12.000     | rf            | 332.3    |
|                |            | rfs           | 0        |
|                |            | rf1           | 332.3    |
|                |            | rfp1          | 0        |
| NOESY          |            | PLOT          |          |
| mixN           | 1,200      | wc            | 200.0    |
|                |            | sc            | 10.0     |
|                |            | wc2           | 200.0    |
|                |            | sc2           | 8.5      |
|                |            | vs            | 111      |
|                |            | th            | 2        |
|                |            | ai            | ph       |
| PRESATURATION  |            |               |          |
| satmode        | n          |               |          |
| wet            | n          |               |          |
| DECOUPLER      |            |               |          |
| dm             | C13        |               |          |
| dm             | nmn        |               |          |
| FLAGS          |            |               |          |
| hs             | nm         |               |          |

NOESY (CDCl<sub>3</sub>, 400 MHz)  
5d

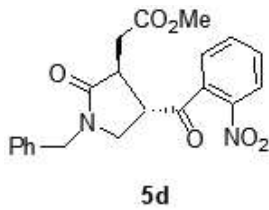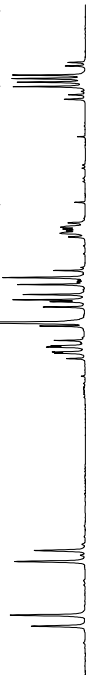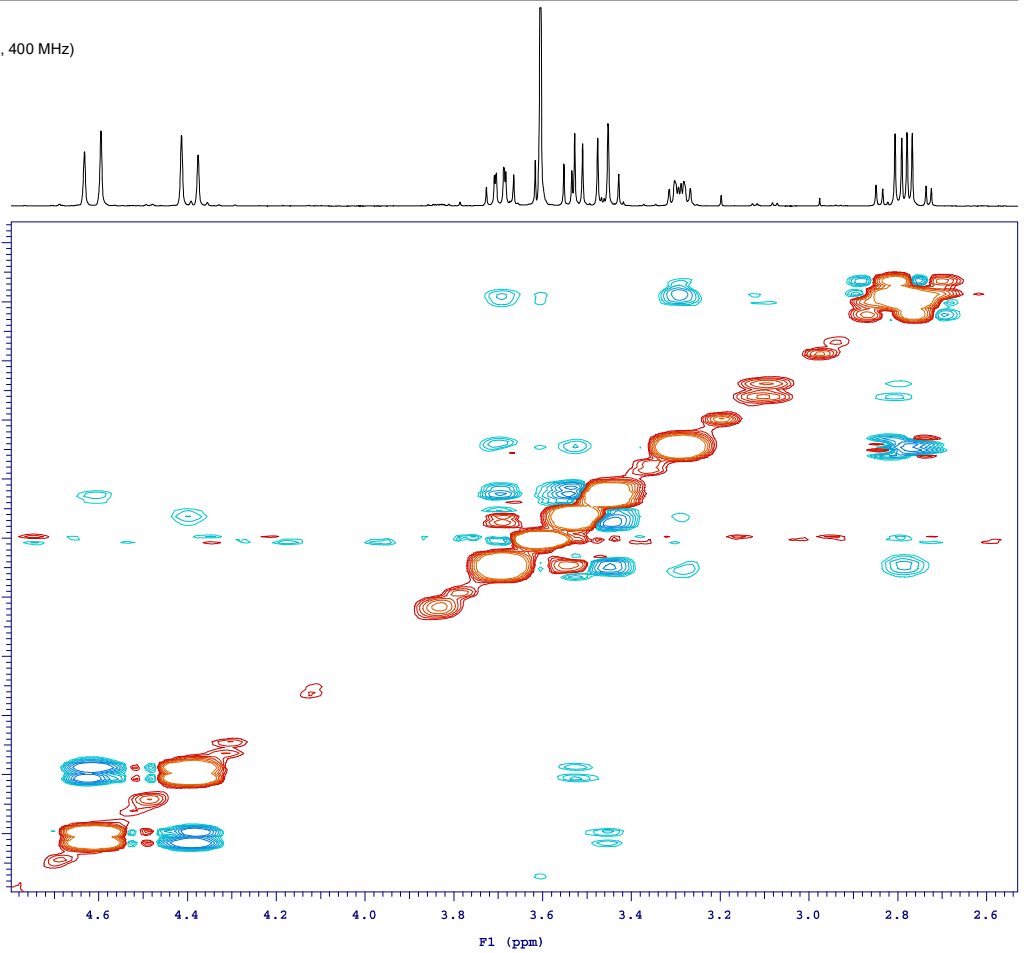

Data file: home\vnmr1\vnmr3sys\data\wang@NO2PhCO2Cyc\_NOESY.fid

Plot date: 2023-01-09

wang@CO2MeCyc

| SAMPLE         |             | ssq4          | y        |
|----------------|-------------|---------------|----------|
| date           | Aug 24 2022 | PF Gltg       | y        |
| solvent        | cdcl3       | hsghl         | 5820     |
| sample         |             |               |          |
| ACQUISITION    |             | SPECIAL       |          |
| temp           | not used    |               |          |
| gain           | 38          |               |          |
| spin           | 0           |               |          |
| F2 PROCESSING  |             |               |          |
| gf             | 0.069       |               |          |
| gfs            | not used    |               |          |
| fn             | 2048        |               |          |
| 2D ACQUISITION |             | F1 PROCESSING |          |
| sw1            | 4231.9      | gf1           | 0.029    |
| nt             | 128         | gfs1          | not used |
|                |             | proc1         | lp       |
|                |             | int           | 2048     |
| TRANSMITTER    |             | DISPLAY       |          |
| tn             | H1          | sp            | 1074.8   |
| slq            | 390.954     | wp            | 818.3    |
| tdf            | -214.0      | sp11          | 1074.8   |
| tpwr           | 59          | wp1           | 818.3    |
| pw             | 12.000      | rf            | 322.0    |
|                |             | rfs           | 0        |
|                |             | rf1           | 322.0    |
|                |             | rfp1          | 0        |
| NOESY          |             | PLOT          |          |
| mixN           | 1,200       | wc            | 200.0    |
|                |             | sc            | 10.0     |
|                |             | wc2           | 200.0    |
|                |             | sc2           | 8.5      |
|                |             | vs            | 285      |
|                |             | th            | 4        |
|                |             | ai            | ph       |
| PRESATURATION  |             |               |          |
| satmode        | n           |               |          |
| wet            | n           |               |          |
| DECOUPLER      |             |               |          |
| dm             | C13         |               |          |
| dm             | nmn         |               |          |
| FLAGS          |             |               |          |
| hs             | nm          |               |          |

NOESY (CDCl<sub>3</sub>, 400 MHz)  
5e

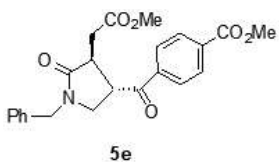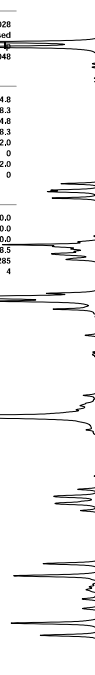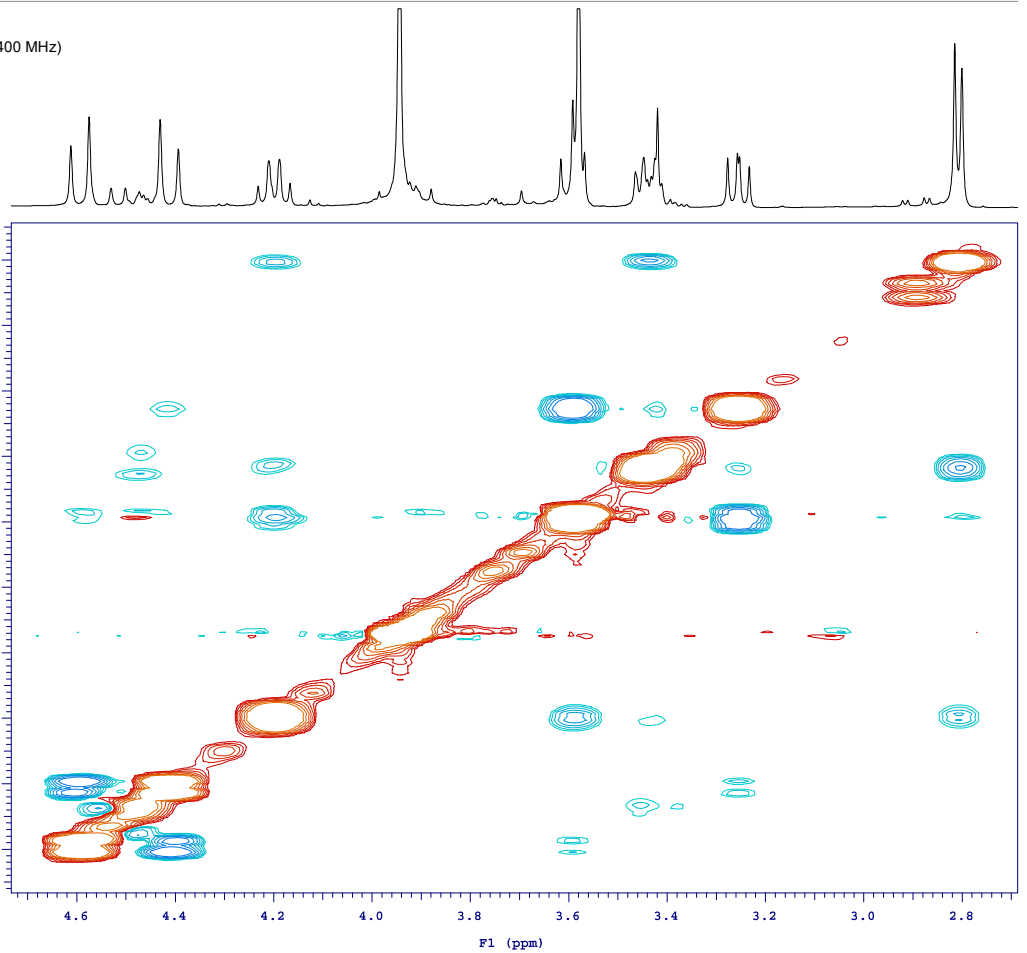

SSS2

Data file: home\vnmr1\vnmr3sys\data\wang@CO2MeCyc\_NOESY.fid

Plot date: 2023-01-08

wang9fCF3PhCOCyc

| SAMPLE         |            | ssup4         | y        |
|----------------|------------|---------------|----------|
| date           | Sep 2 2022 | PF GfG        | y        |
| solvent        | cdcl3      | hsghl         | 5820     |
| sample         |            |               |          |
| ACQUISITION    |            |               |          |
| sw             | 3908.5     | temp          | not used |
| al             | 0.150      | gain          | 38       |
| np             | 1174       | spin          | 0        |
| fb             | not used   |               |          |
| ss             | 32         | F2 PROCESSING |          |
| d1             | 1.000      | gf            | 0.069    |
| rt             | 4          | gfs           | not used |
|                |            | fn            | 2048     |
| 2D ACQUISITION |            |               |          |
| sw1            | 3908.5     | gfl           | 0.030    |
| nl             | 128        | gfs1          | not used |
|                |            | proc1         | lp       |
|                |            | int1          | 2048     |
| TRANSMITTER    |            |               |          |
| tn             | H1         |               |          |
| slq            | 390.954    |               |          |
| tdl            | -381.9     | sp            | 979.6    |
| tpwr           | 59         | wp            | 950.4    |
| pw             | 12.000     | sp1           | 979.6    |
|                |            | wp1           | 956.4    |
|                |            | rf            | 329.6    |
|                |            | rfs           | 0        |
|                |            | rf1           | 329.6    |
|                |            | rfp1          | 0        |
| PRESATURATION  |            |               |          |
| satmode        | n          |               |          |
| wet            | n          | vc            | 200.0    |
|                |            | sc            | 10.0     |
|                |            | wc2           | 200.0    |
|                |            | sc2           | 8.5      |
|                |            | vs            | 119      |
|                |            | th            | 2        |
|                |            | ai            | ph       |
| DECOUPLER      |            |               |          |
| dm             | C13        |               |          |
| dm             | nmn        |               |          |
| FLAGS          |            |               |          |
| hs             | nm         |               |          |

NOESY (CDCl<sub>3</sub>, 400 MHz)  
5f

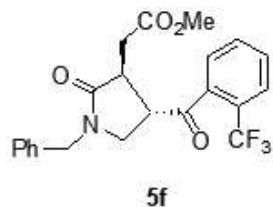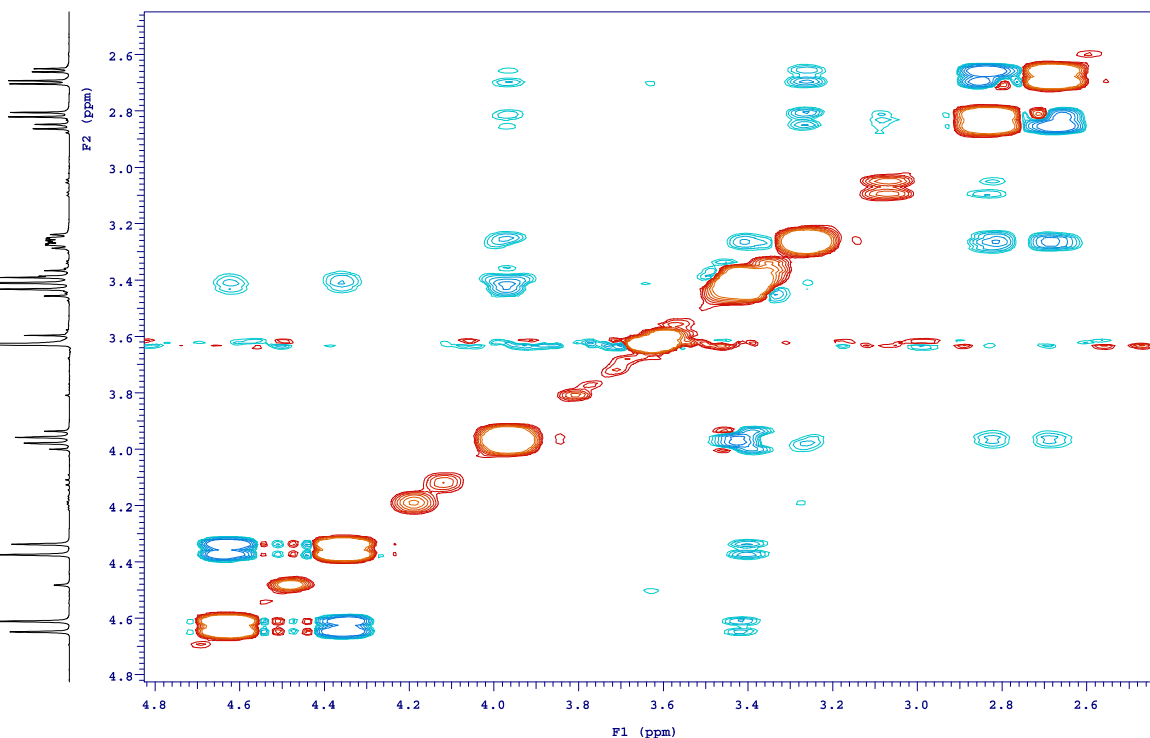

Data file: home\vnmr1\vnmr\sys\data\wang9fCF3PhCOCyc\_NOESY.fid

Plot date: 2023-01-09

wang9fMeOPhCOCyc

| SAMPLE         |            | ssup4         | y        |
|----------------|------------|---------------|----------|
| date           | Sep 2 2022 | PF GfG        | y        |
| solvent        | cdcl3      | hsghl         | 5820     |
| sample         |            |               |          |
| ACQUISITION    |            |               |          |
| sw             | 4042.9     | temp          | not used |
| al             | 0.150      | gain          | 42       |
| np             | 1214       | spin          | 0        |
| fb             | not used   |               |          |
| ss             | 32         | F2 PROCESSING |          |
| d1             | 1.000      | gf            | 0.069    |
| rt             | 32         | gfs           | not used |
|                |            | fn            | 2048     |
| 2D ACQUISITION |            |               |          |
| sw1            | 4042.9     | gfl           | 0.029    |
| nl             | 128        | gfs1          | not used |
|                |            | proc1         | lp       |
|                |            | int1          | 2048     |
| TRANSMITTER    |            |               |          |
| tn             | H1         |               |          |
| slq            | 390.954    |               |          |
| tdl            | -315.6     | sp            | 1052.8   |
| tpwr           | 59         | wp            | 860.7    |
| pw             | 12.000     | sp1           | 1052.8   |
|                |            | wp1           | 860.7    |
|                |            | rf            | 333.0    |
|                |            | rfs           | 0        |
|                |            | rf1           | 333.0    |
|                |            | rfp1          | 0        |
| PRESATURATION  |            |               |          |
| satmode        | n          |               |          |
| wet            | n          | vc            | 200.0    |
|                |            | sc            | 10.0     |
|                |            | wc2           | 200.0    |
|                |            | sc2           | 8.5      |
|                |            | vs            | 166      |
|                |            | th            | 2        |
|                |            | ai            | ph       |
| DECOUPLER      |            |               |          |
| dm             | C13        |               |          |
| dm             | nmn        |               |          |
| FLAGS          |            |               |          |
| hs             | nm         |               |          |

NOESY (CDCl<sub>3</sub>, 400 MHz)  
5g

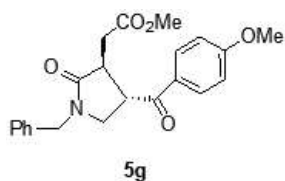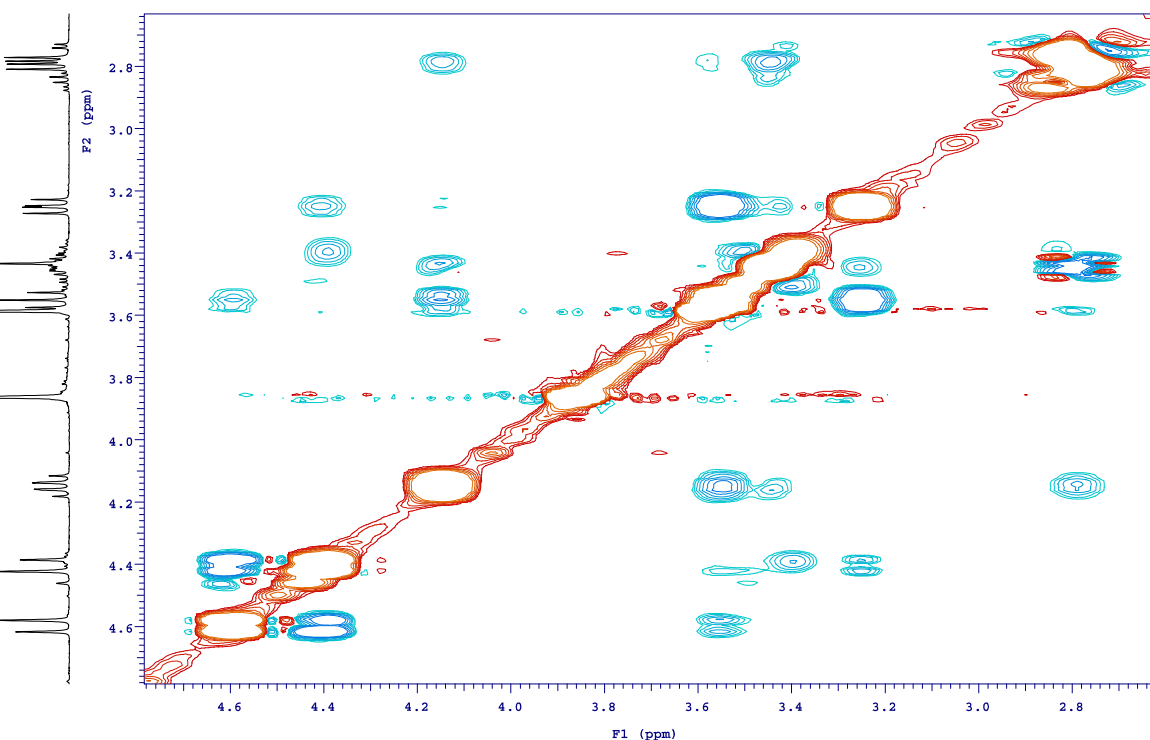

SSS3

Data file: home\vnmr1\vnmr\sys\data\wang9fMeOPhCOCyc\_NOESY.fid

Plot date: 2023-01-09

wang9MePhCyc

| SAMPLE         |             | ssol4         | y        |
|----------------|-------------|---------------|----------|
| date           | Sep 23 2022 | PF GfG        | y        |
| solvent        | cdcl3       | hsghf         | 5820     |
| sample         |             |               |          |
| ACQUISITION    |             | SPECIAL       |          |
| temp           | not used    |               |          |
| gain           | 42          |               |          |
| spin           | 0           |               |          |
| F2 PROCESSING  |             |               |          |
| gf             | 0.069       |               |          |
| gfs            | not used    |               |          |
| fn             | 2048        |               |          |
| 2D ACQUISITION |             | F1 PROCESSING |          |
| var1           | 3870.0      | gf1           | 0.030    |
| nt             | 128         | gfs1          | not used |
|                |             | proc1         | lp       |
|                |             | int           | 2048     |
| TRANSMITTER    |             | DISPLAY       |          |
| tn             | H1          | sp            | 1050.9   |
| slq            | 390.954     | wp            | 854.1    |
| col            | -344.3      | sp1           | 1050.9   |
| tpwr           | 59          | wp1           | 854.1    |
| pw             | 12.000      | rl            | 275.6    |
|                |             | rfs           | 0        |
|                |             | rf1           | 275.6    |
|                |             | rfp1          | 0        |
| NOESY          |             | PLOT          |          |
| mixN           | 1,200       | wc            | 200.0    |
|                |             | sc            | 10.0     |
|                |             | wc2           | 200.0    |
|                |             | sc2           | 8.5      |
|                |             | vs            | 229      |
|                |             | th            | 3        |
|                |             | al            | ph       |
| PRESATURATION  |             |               |          |
| satmode        | n           |               |          |
| wet            | n           |               |          |
| DECOUPLER      |             |               |          |
| dm             | C13         |               |          |
| dm             | nnn         |               |          |
| FLAGS          |             |               |          |
| hs             | nm          |               |          |

NOESY (CDCl<sub>3</sub>, 400 MHz)  
5h (trans/cis = 13 : 1)

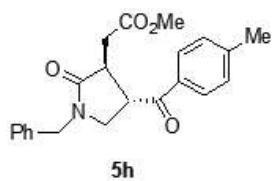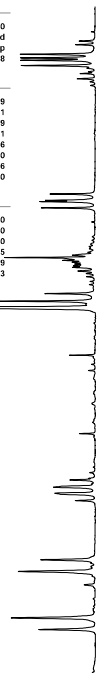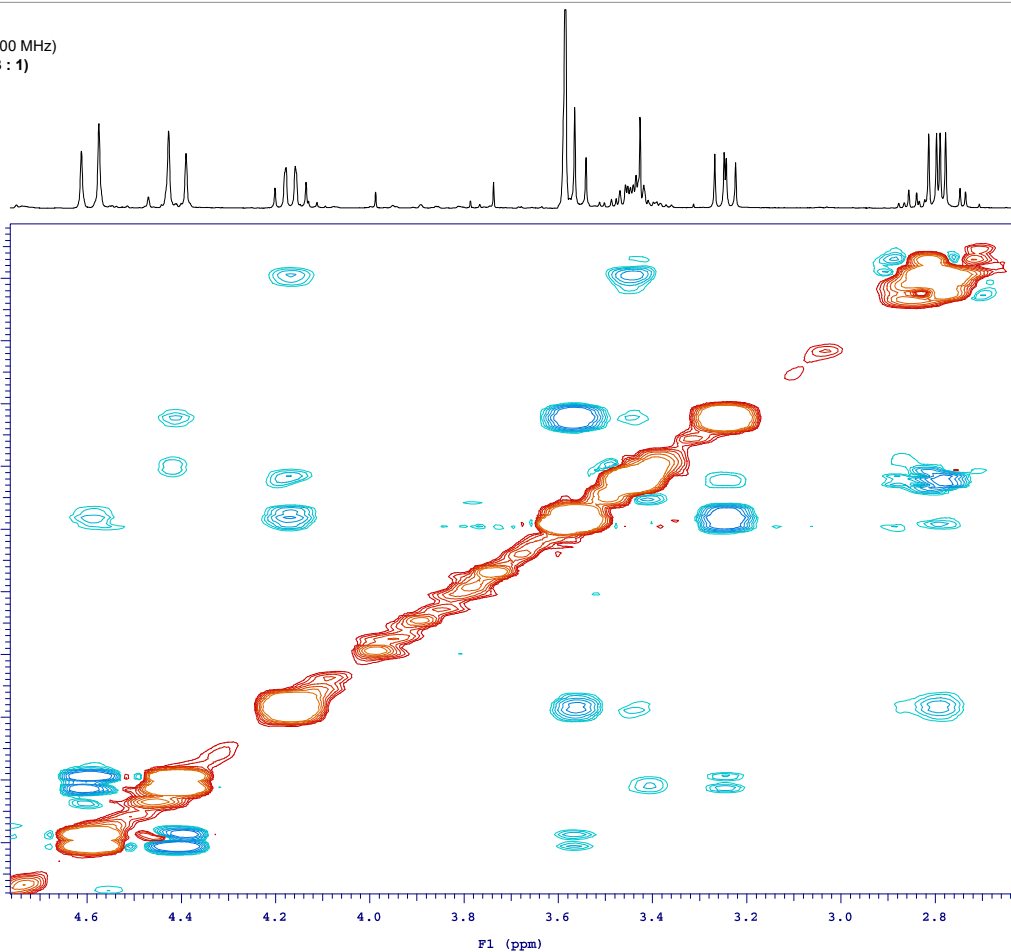

Data file: /home/vnmr1/vnmr/sy/data/wang9MePhCyc\_NOESY.fid

Plot date: 2023-01-09

wang9MePhCymix

| SAMPLE         |             | ssol4         | y        |
|----------------|-------------|---------------|----------|
| date           | Sep 28 2022 | PF GfG        | y        |
| solvent        | cdcl3       | hsghf         | 5820     |
| sample         |             |               |          |
| ACQUISITION    |             | SPECIAL       |          |
| temp           | not used    |               |          |
| gain           | 20          |               |          |
| spin           | 0           |               |          |
| F2 PROCESSING  |             |               |          |
| gf             | 0.069       |               |          |
| gfs            | not used    |               |          |
| fn             | 2048        |               |          |
| 2D ACQUISITION |             | F1 PROCESSING |          |
| var1           | 4042.9      | gf1           | 0.029    |
| nt             | 128         | gfs1          | not used |
|                |             | proc1         | lp       |
|                |             | int           | 2048     |
| TRANSMITTER    |             | DISPLAY       |          |
| tn             | H1          | sp            | 926.8    |
| slq            | 390.954     | wp            | 963.3    |
| col            | -304.6      | sp1           | 926.8    |
| tpwr           | 59          | wp1           | 963.3    |
| pw             | 12.000      | rl            | 320.8    |
|                |             | rfs           | 0        |
|                |             | rf1           | 320.8    |
|                |             | rfp1          | 0        |
| NOESY          |             | PLOT          |          |
| mixN           | 1,200       | wc            | 200.0    |
|                |             | sc            | 10.0     |
|                |             | wc2           | 200.0    |
|                |             | sc2           | 8.5      |
|                |             | vs            | 221      |
|                |             | th            | 3        |
|                |             | al            | ph       |
| PRESATURATION  |             |               |          |
| satmode        | n           |               |          |
| wet            | n           |               |          |
| DECOUPLER      |             |               |          |
| dm             | C13         |               |          |
| dm             | nnn         |               |          |
| FLAGS          |             |               |          |
| hs             | nm          |               |          |

NOESY (CDCl<sub>3</sub>, 400 MHz)  
5h (trans/cis = 1.2 : 1)

(cis-5h)  
4

(cis-5h)  
3

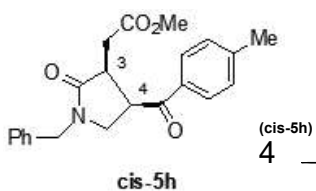

(cis-5h)  
3

(cis-5h)  
4

(cis-5h)  
3

(cis-5h)  
4

(cis-5h)  
3

(cis-5h)  
4

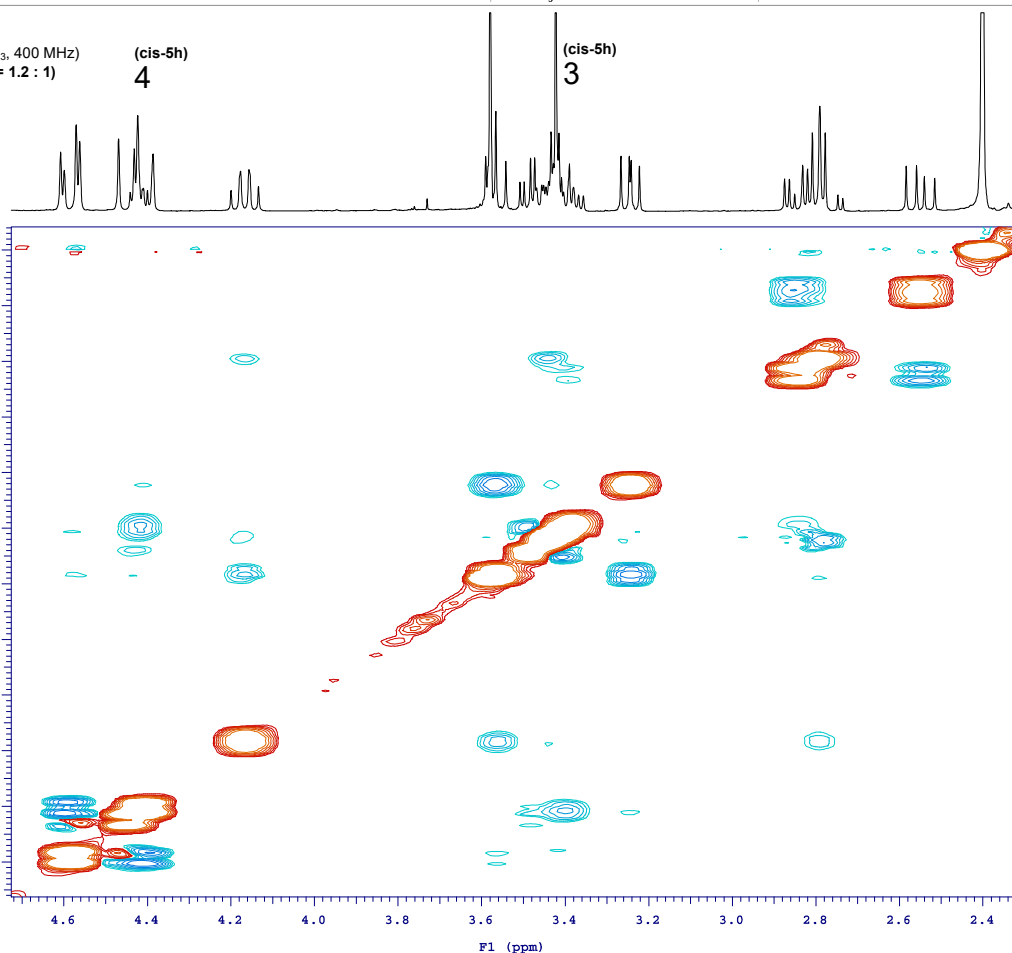

SSS4

Data file: /home/vnmr1/vnmr/sy/data/wang9MePhCymix\_NOESY.fid

Plot date: 2023-01-09

wang9iPhCOcyc

| SAMPLE         |            | ssout         | y        |
|----------------|------------|---------------|----------|
| date           | Sep 7 2022 | PF GfG        | y        |
| solvent        | cdcl3      | hsghl         | 5820     |
| sample         |            |               |          |
| ACQUISITION    |            | SPECIAL       |          |
| temp           | not used   |               |          |
| gain           | 38         |               |          |
| spin           | 0          |               |          |
| F2 PROCESSING  |            |               |          |
| gf             | 0.069      |               |          |
| gfs            | not used   |               |          |
| fn             | 2048       |               |          |
| 2D ACQUISITION |            | F1 PROCESSING |          |
| sw1            | 4056.8     | gf1           | 0.029    |
| nt             | 128        | gfs1          | not used |
|                |            | proc1         | lp       |
|                |            | int           | 2048     |
| TRANSMITTER    |            | DISPLAY       |          |
| tn             | H1         | sc            | 200.0    |
| slq            | 390.954    | sc2           | 10.0     |
| tol            | -258.2     | vc            | 200.0    |
| tpwr           | 59         | vc2           | 8.5      |
| pw             | 12.000     | vs            | 107      |
|                |            | th            | 2        |
|                |            | all           | ph       |
| NOESY          |            | PLOT          |          |
| mixN           | 1,200      | vc            | 200.0    |
|                |            | sc            | 10.0     |
|                |            | vc2           | 200.0    |
|                |            | vc2           | 8.5      |
|                |            | vs            | 107      |
|                |            | th            | 2        |
|                |            | all           | ph       |
| PRESATURATION  |            | PLOT          |          |
| satmode        | n          | vc            | 200.0    |
| wet            | n          | sc            | 10.0     |
|                |            | vc2           | 200.0    |
|                |            | vc2           | 8.5      |
|                |            | vs            | 107      |
|                |            | th            | 2        |
|                |            | all           | ph       |
| DECOUPLER      |            | PLOT          |          |
| dm             | C13        | vc            | 200.0    |
| dm             | nnn        | sc            | 10.0     |
|                |            | vc2           | 200.0    |
|                |            | vc2           | 8.5      |
|                |            | vs            | 107      |
|                |            | th            | 2        |
|                |            | all           | ph       |
| FLAGS          |            | PLOT          |          |
| hs             | nm         | vc            | 200.0    |
|                |            | sc            | 10.0     |
|                |            | vc2           | 200.0    |
|                |            | vc2           | 8.5      |
|                |            | vs            | 107      |
|                |            | th            | 2        |
|                |            | all           | ph       |

NOESY (CDCl<sub>3</sub>, 400 MHz)  
5i

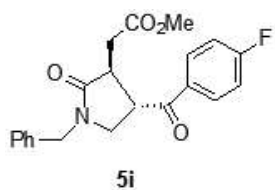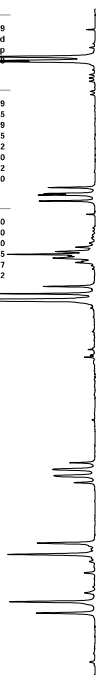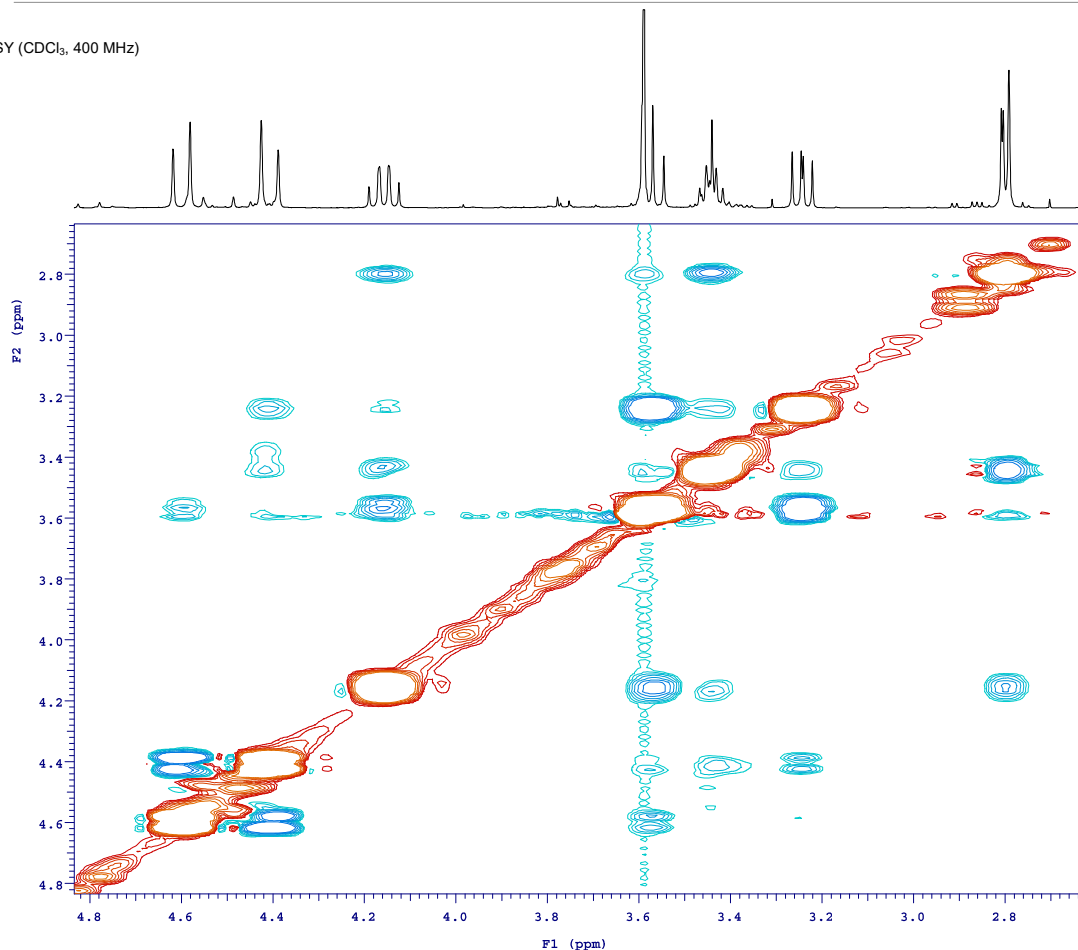

Data file: /home/vnmr1/vnmr/sys/data/wang9iPhCOcyc\_NOESY.fid

Plot date: 2023-01-09

torii4ClPhCOcyc

| SAMPLE         |             | ssout         | y        |
|----------------|-------------|---------------|----------|
| date           | Oct 24 2022 | PF GfG        | y        |
| solvent        | cdcl3       | hsghl         | 5820     |
| sample         |             |               |          |
| ACQUISITION    |             | SPECIAL       |          |
| temp           | not used    |               |          |
| gain           | 42          |               |          |
| spin           | 0           |               |          |
| F2 PROCESSING  |             |               |          |
| gf             | 0.069       |               |          |
| gfs            | not used    |               |          |
| fn             | 2048        |               |          |
| 2D ACQUISITION |             | F1 PROCESSING |          |
| sw1            | 4128.0      | gf1           | 0.029    |
| nt             | 128         | gfs1          | not used |
|                |             | proc1         | lp       |
|                |             | int           | 2048     |
| TRANSMITTER    |             | DISPLAY       |          |
| tn             | H1          | sc            | 200.0    |
| slq            | 390.954     | sc2           | 10.0     |
| tol            | -205.7      | vc            | 200.0    |
| tpwr           | 59          | vc2           | 8.5      |
| pw             | 12.000      | vs            | 104      |
|                |             | th            | 2        |
|                |             | all           | ph       |
| NOESY          |             | PLOT          |          |
| mixN           | 1,200       | vc            | 200.0    |
|                |             | sc            | 10.0     |
|                |             | vc2           | 200.0    |
|                |             | vc2           | 8.5      |
|                |             | vs            | 104      |
|                |             | th            | 2        |
|                |             | all           | ph       |
| PRESATURATION  |             | PLOT          |          |
| satmode        | n           | vc            | 200.0    |
| wet            | n           | sc            | 10.0     |
|                |             | vc2           | 200.0    |
|                |             | vc2           | 8.5      |
|                |             | vs            | 104      |
|                |             | th            | 2        |
|                |             | all           | ph       |
| DECOUPLER      |             | PLOT          |          |
| dm             | C13         | vc            | 200.0    |
| dm             | nnn         | sc            | 10.0     |
|                |             | vc2           | 200.0    |
|                |             | vc2           | 8.5      |
|                |             | vs            | 104      |
|                |             | th            | 2        |
|                |             | all           | ph       |
| FLAGS          |             | PLOT          |          |
| hs             | nm          | vc            | 200.0    |
|                |             | sc            | 10.0     |
|                |             | vc2           | 200.0    |
|                |             | vc2           | 8.5      |
|                |             | vs            | 104      |
|                |             | th            | 2        |
|                |             | all           | ph       |

NOESY (CDCl<sub>3</sub>, 400 MHz)  
5j

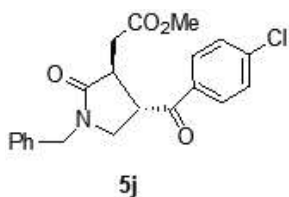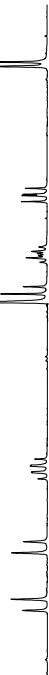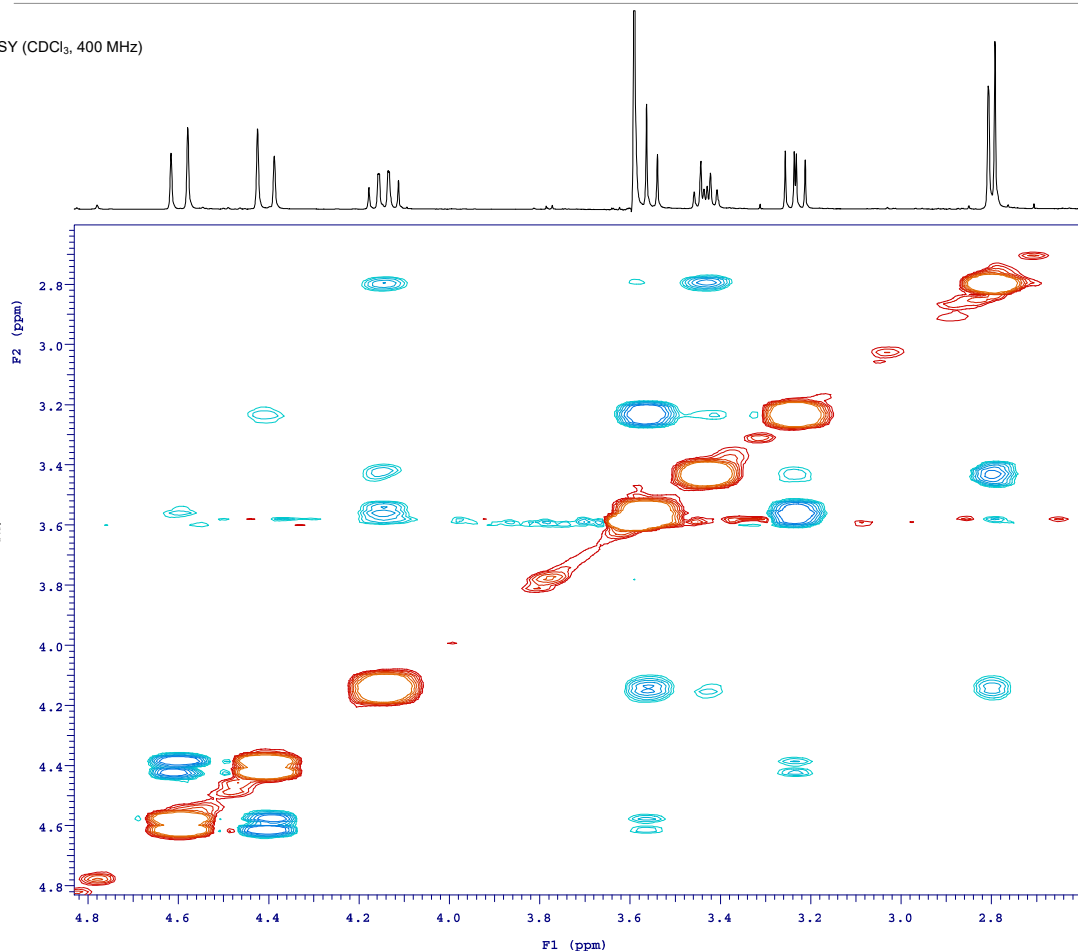

SSS5

Data file: /home/vnmr1/vnmr/sys/data/torii4ClPhCOcyc\_NOESY.fid

Plot date: 2023-01-07

miyake12ZCICOPh

| SAMPLE         |            | ssol4         | y        |
|----------------|------------|---------------|----------|
| date           | Dec 9 2022 | PF01g         | y        |
| solvent        | cdcl3      | hsghl         | 5820     |
| sample         |            |               |          |
| ACQUISITION    |            | SPECIAL       |          |
| sw             | 3807.3     | temp          | not used |
| al             | 0.150      | gain          | 38       |
| rp             | 1140       | spin          | 0        |
| fb             | not used   | F2 PROCESSING |          |
| ss             | 32         | gf            | 0.060    |
| d1             | 1.000      | gfs           | not used |
| nt             | 32         | fn            | 2048     |
| 2D ACQUISITION |            | F1 PROCESSING |          |
| sw1            | 3807.3     | gf1           | 0.031    |
| nt             | 128        | gfs1          | not used |
| proc1          |            | proc1         | lp       |
| init           |            | int           | 2048     |
| TRANSMITTER    |            | DISPLAY       |          |
| tn             | H1         | sp            | 1000.5   |
| slrq           | 390.953    | wp            | 910.9    |
| tol            | -458.9     | sp1           | 1000.5   |
| tpwr           | 59         | wp1           | 910.9    |
| pw             | 12.000     | rf            | 356.6    |
| NOESY          |            | rfs           | 0        |
| mixN           | 1.200      | rf1           | 356.6    |
| rp1            |            | rfs1          | 0        |
| PRESATURATION  |            | PLOT          |          |
| satmode        | n          | wc            | 200.0    |
| wet            | n          | sc            | 10.0     |
| DECOUPLER      |            | wc2           | 200.0    |
| dm             | C13        | sc2           | 8.5      |
| dm             | nnn        | wp            | 173      |
| th             |            | rf            | 2        |
| al             | ph         |               |          |
| FLAGS          |            |               |          |
| hs             | nm         |               |          |

NOESY (CDCl<sub>3</sub>, 400 MHz)  
5k

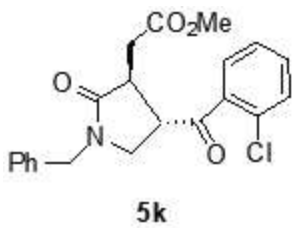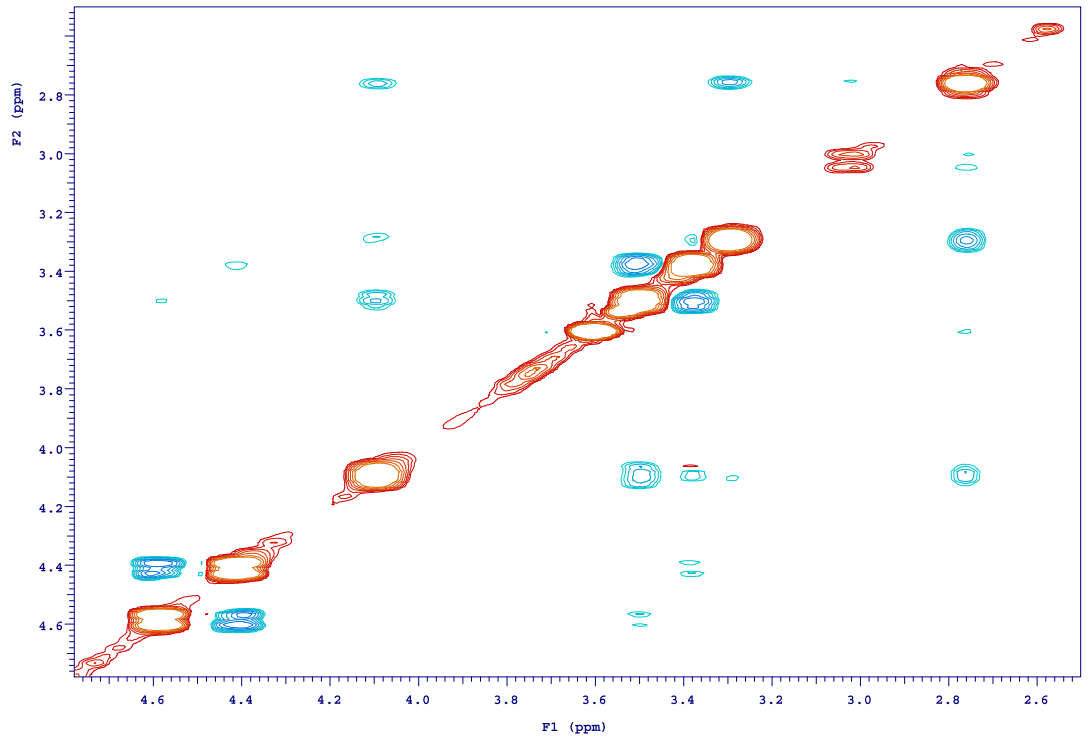

Data file: home\vnmr1\wnmrsys\data\miyake12ZCICOPh\_NOESY.fid

Plot date: 2023-01-07

NOESY (CDCl<sub>3</sub>, 400 MHz)  
5l

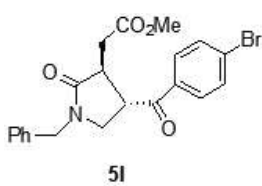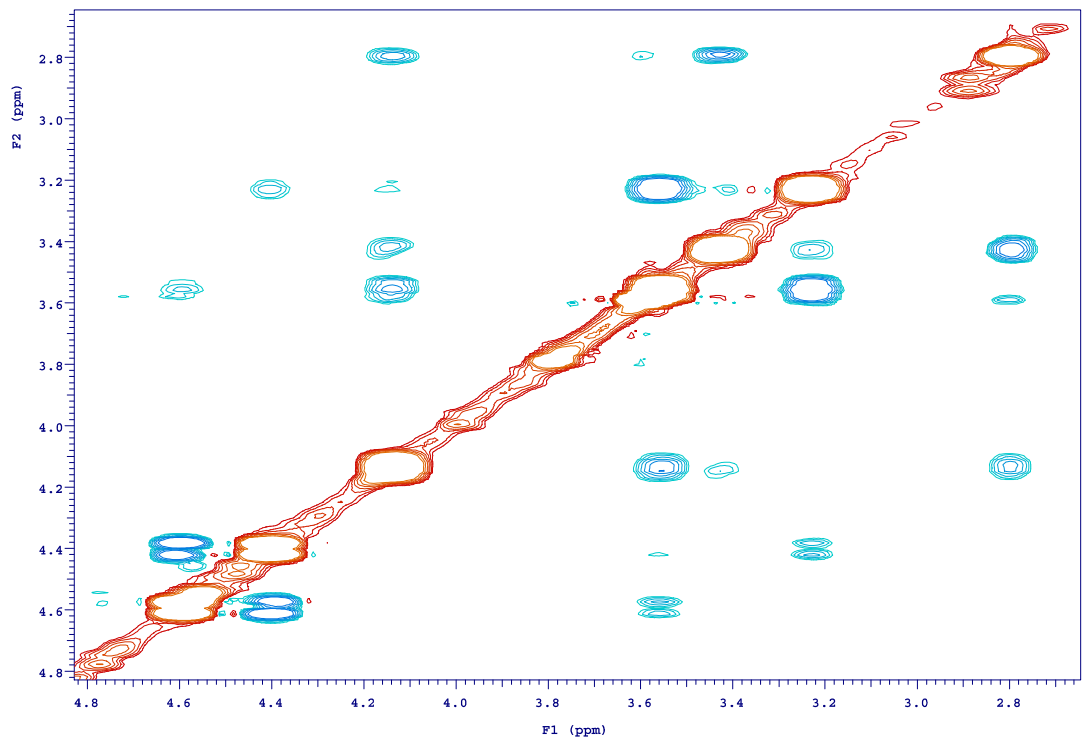

SSS6

Data file: home\vnmr1\wnmrsys\data\wang1018PNCOCyc\_NOESY.fid

Plot date: 2023-01-13

NOESY (CDCl<sub>3</sub>, 400 MHz)  
7a

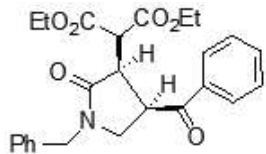

7a

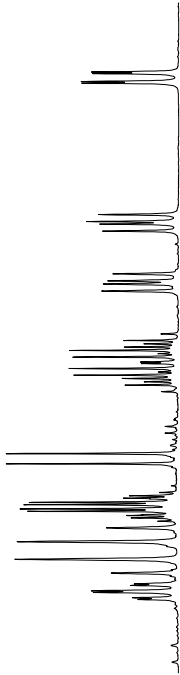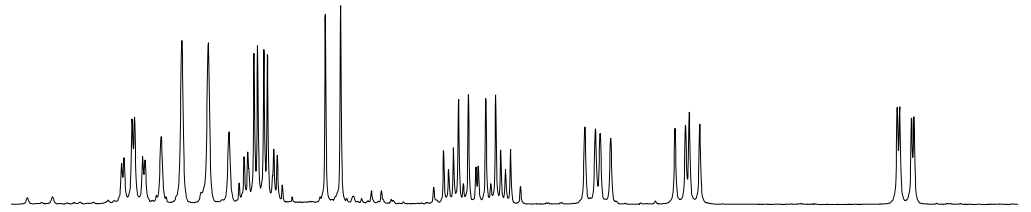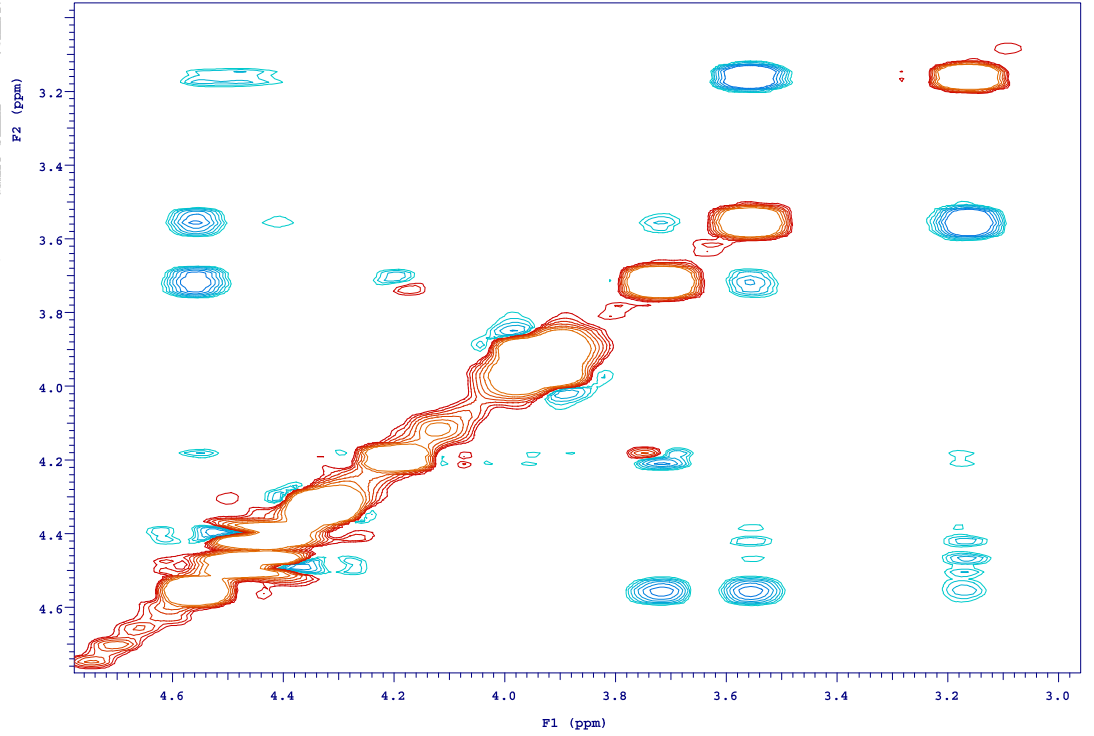

Data file: home\vnmr1\vnmr\sys\data\wang10\GEPHCycR\_NOESY.fid

Plot date: 2023-01-11

NOESY (CDCl<sub>3</sub>, 400 MHz)  
7b

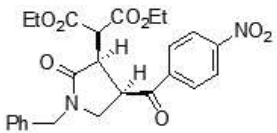

7b

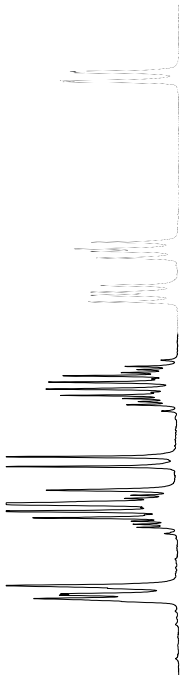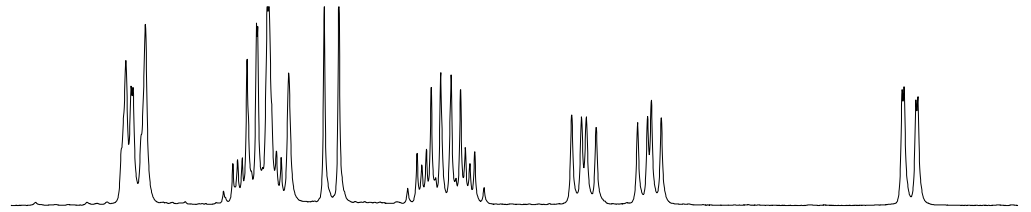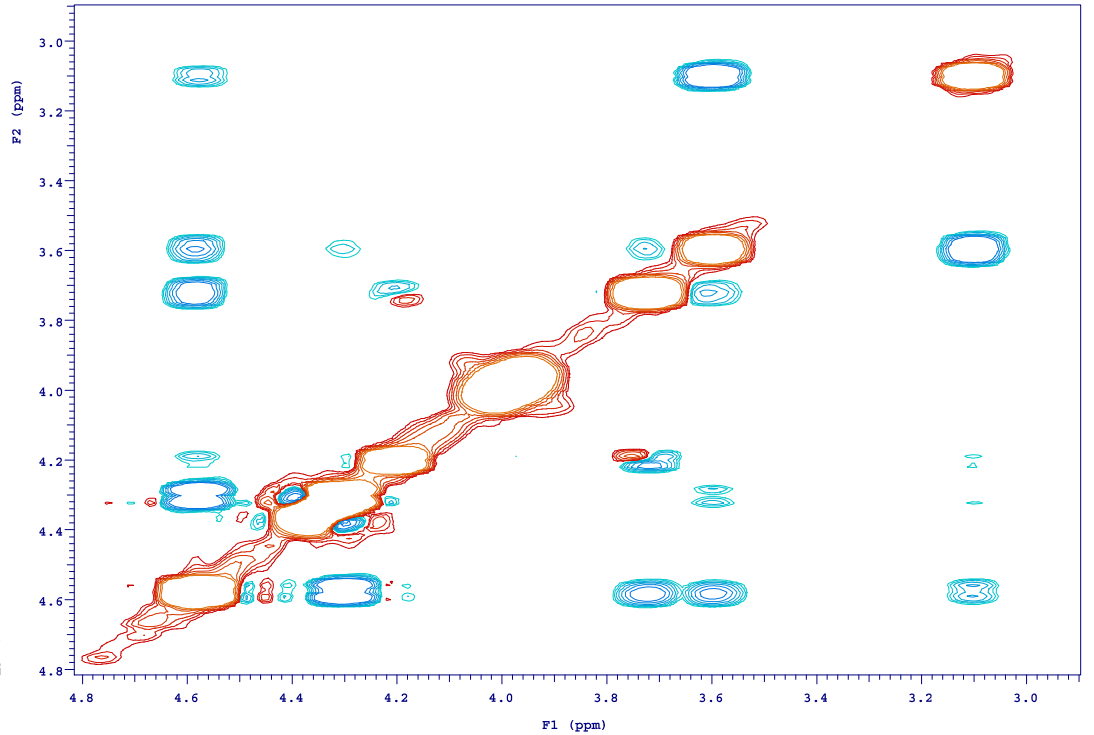

SSS7

Data file: home\vnmr1\vnmr\sys\data\wang10\GEpNO2PhCycR\_NOESY.fid

Plot date: 2023-01-11

wang10/Et2CCHCyc

NOESY (CDCl<sub>3</sub>, 400 MHz)  
9\_1

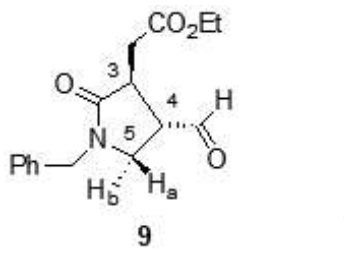

CHO

F2 (ppm)

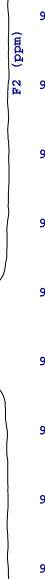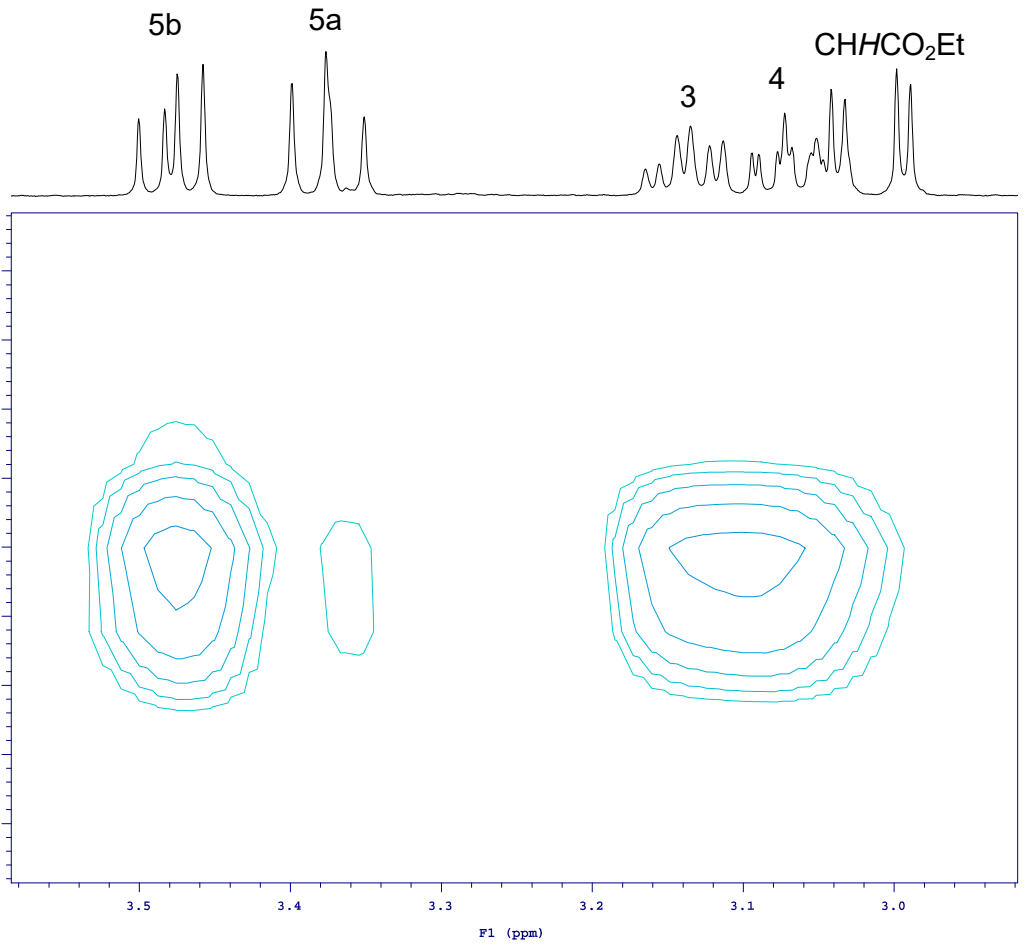

Data file: home/vnmr1/vnmr/sys/data/wang10/Et2CCHCyc\_NOESY.tid

Plot date: 2023-01-20

NOESY (CDCl<sub>3</sub>, 400 MHz)  
9\_2

wang10/Et2CCHCyc

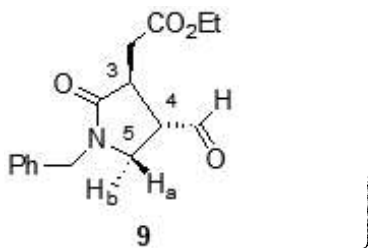

CHHCO<sub>2</sub>Et

CHHCO<sub>2</sub>Et  
4

3

5a

5b

F2 (ppm)

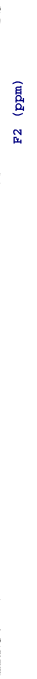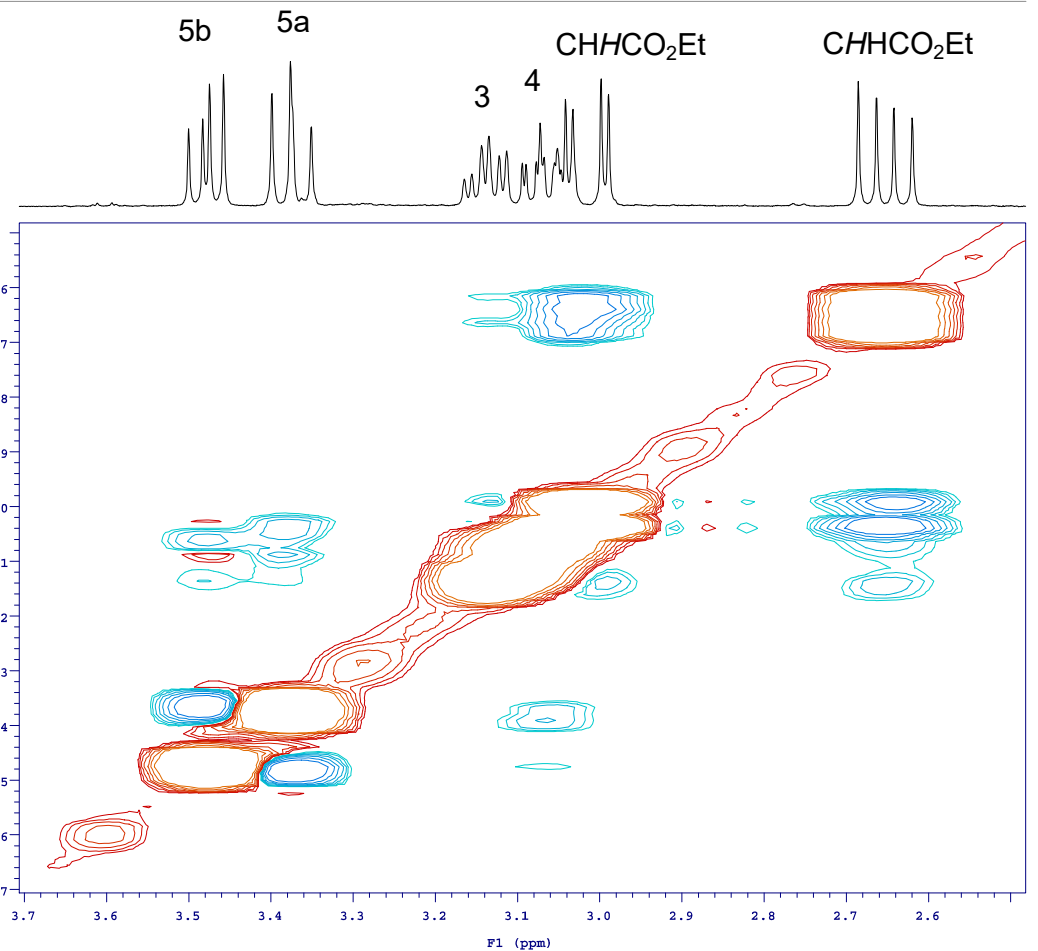

SSS8

Data file: home/vnmr1/vnmr/sys/data/wang10/Et2CCHCyc\_NOESY.tid

Plot date: 2023-01-20
