# Supplementary material for: Intramolecular cyclization reactions of arylpropargyl amides of electron-deficient α,β-alkenyl carboxylates and related compounds
Source: Royal Society of Chemistry journal article supplement (doi:10.1039/d3ob00129f), 2023-01-01
Supplement: d3ob00129f3.pdf [file d3ob00129f3.pdf]

## **Intramolecular Cyclization Reactions of Arylpropargyl Amides of Electron-deficient $\alpha,\beta$ -Alkenyl Carboxylates and Related Compounds**

Zhichao Wang,<sup>a</sup> Shoko Yamazaki,<sup>\*b</sup> Tsumoru Morimoto,<sup>c</sup> Hiroshi Takashima,<sup>d</sup> Ayane Nakaoku,<sup>d</sup> Makoto Shimizu,<sup>d</sup> and Akiya Ogawa<sup>a</sup>

<sup>a</sup>*Department of Applied Chemistry, Graduate School of Engineering, Osaka Prefecture University, Gakuen-cho 1-1, Nakaku, Sakai, Osaka 599-8531, Japan,* <sup>b</sup>*Department of Chemistry, Nara University of Education, Takabatake-cho, Nara 630-8528, Japan,* <sup>c</sup>*Graduate School of Materials Science, Nara Institute of Science and Technology (NAIST), Takayama, Ikoma, Nara 630-0192, Japan,* <sup>d</sup>*Department of Chemistry, Faculty of Science, Nara Women's University, Nara 630-8506, Japan*

*yamazaks@cc.nara-edu.ac.jp*

|                                                                  |                 |
|------------------------------------------------------------------|-----------------|
| I-1. Figure S1. Optimized structures in Scheme 12                | Page S2         |
| I-2. Figure S2. Optimized structures in Scheme 13                | Page S2         |
| I-3. Figure S3. Optimized structures in Scheme 14                | Page S3         |
| I-4. Figure S4. Optimized structures in Scheme 15                | Page S4         |
| I-5. Figure S5. Optimized structures in Scheme 16                | Page S5         |
| I-6. Cartesian coordinates of the optimized geometries           | Pages S6-S30    |
| II. Copies of the <sup>1</sup> H and <sup>13</sup> C NMR spectra | Pages SS1-SS51  |
| III. Copies of the 2D NOESY spectra                              | Pages SSS1-SSS8 |

I-1. Figure S1. Optimized structures in Scheme 12.

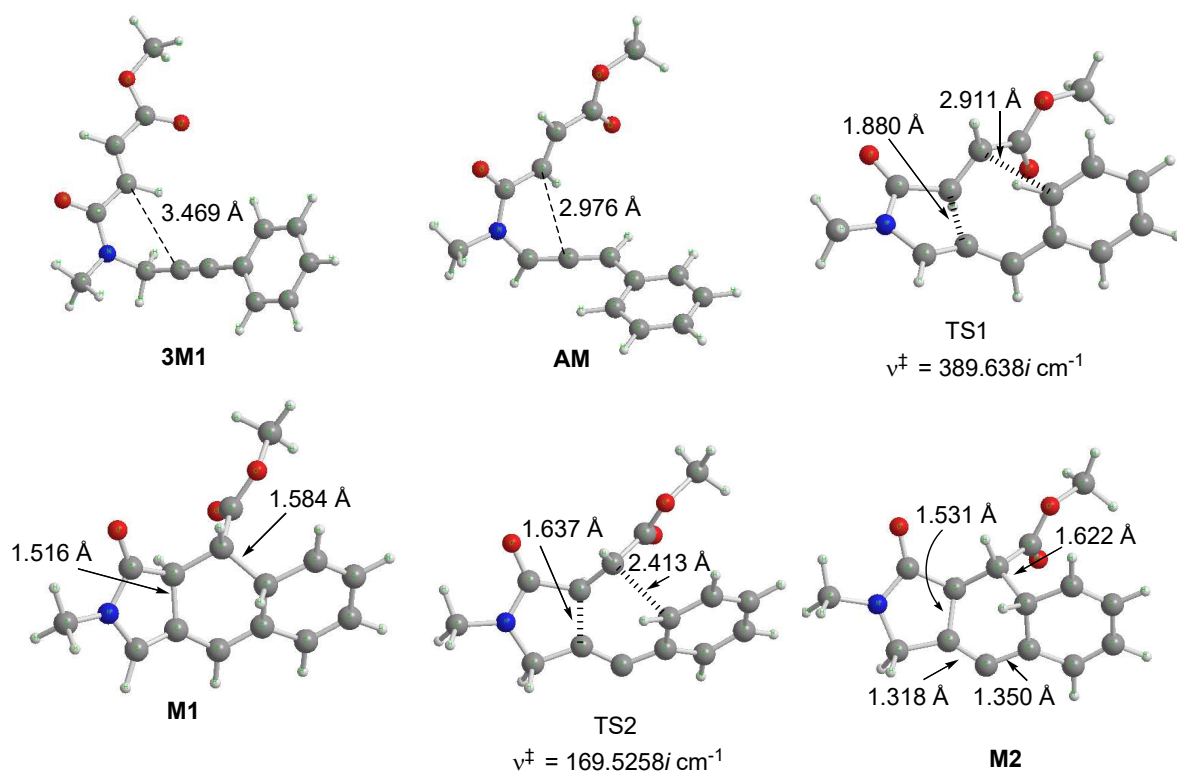

I-2. Figure S2. Optimized structures in Scheme 13.

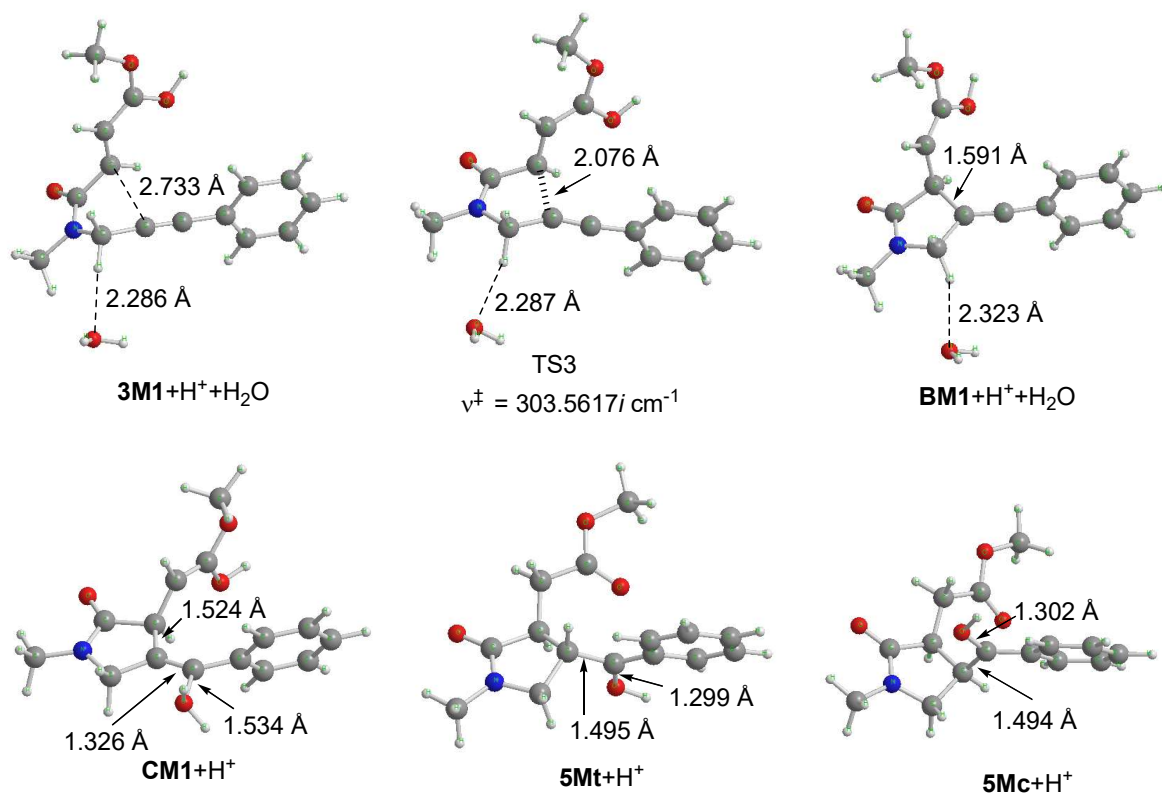

I-3. Figure S3. Optimized structures in Scheme 14

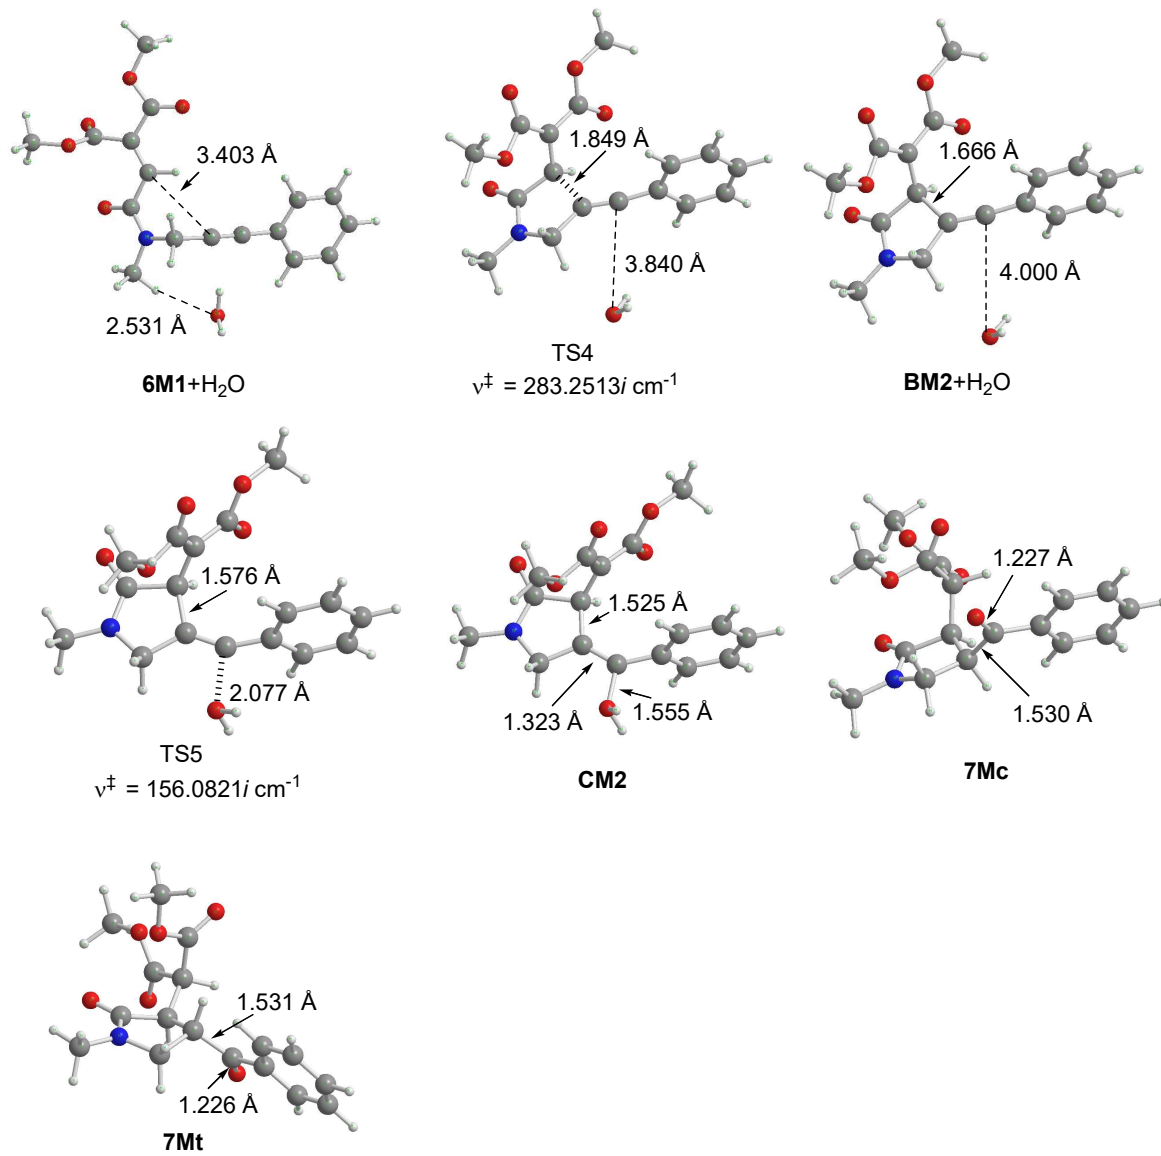

I-4. Figure S4. Optimized structures in Scheme 15

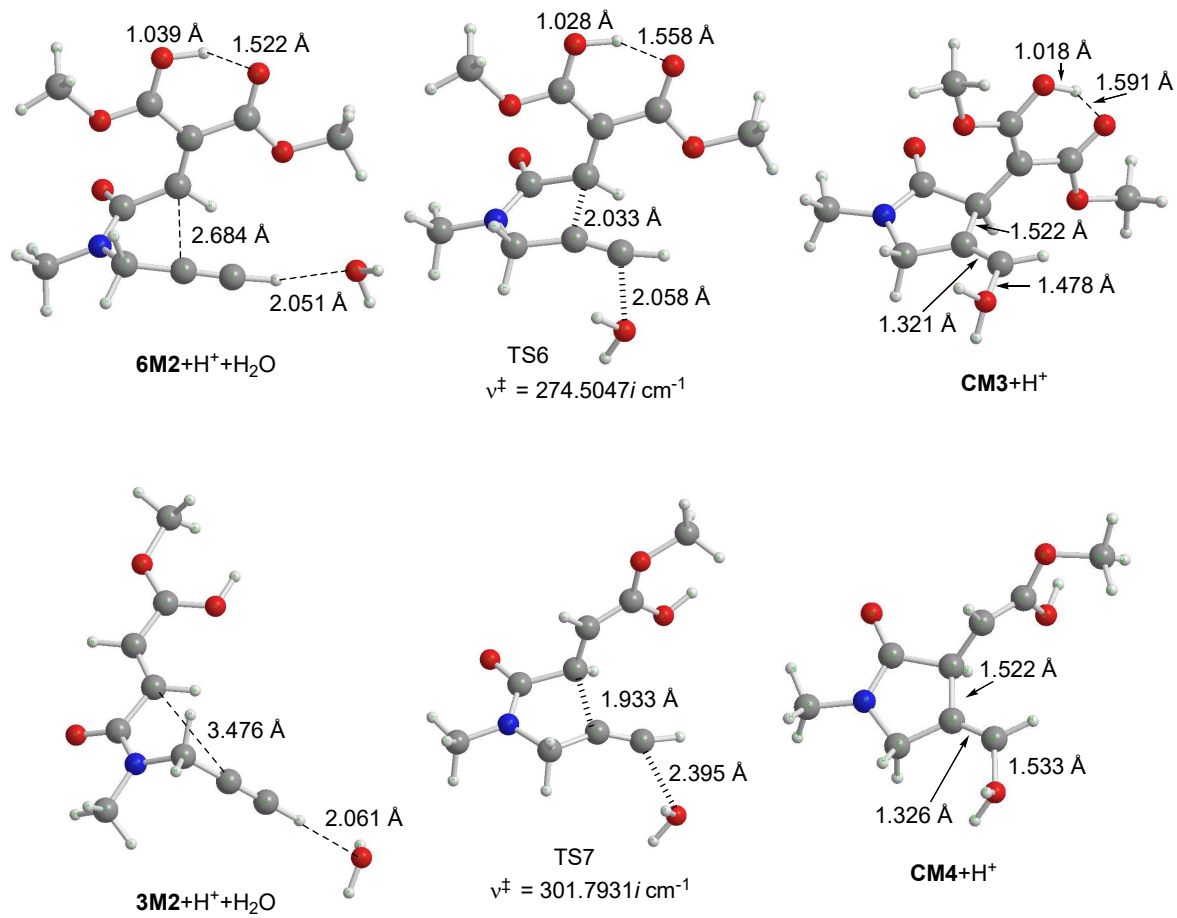

I-5. Figure S5. Optimized structures in Scheme 16

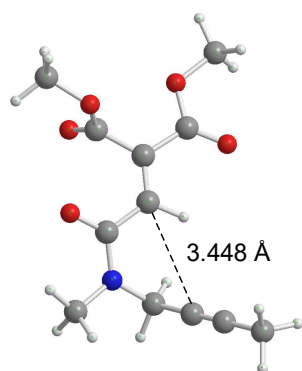

**6M3**

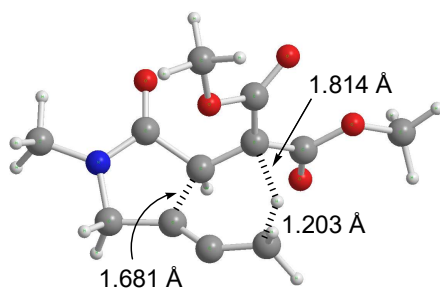

TS8

$$v^\ddagger = 275.1644i \text{ cm}^{-1}$$

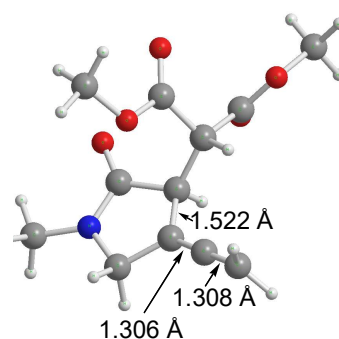

**10M1**

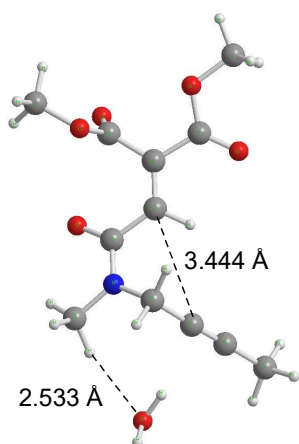

**6M3+H<sub>2</sub>O**

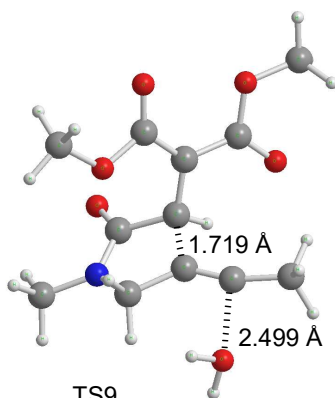

TS9

$$v^\ddagger = 73.3411i \text{ cm}^{-1}$$

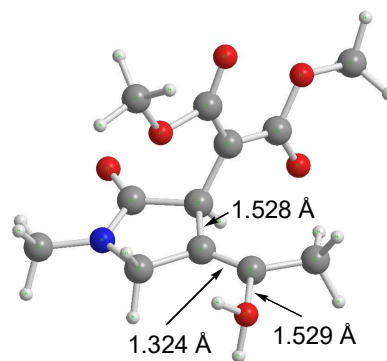

**CM5**

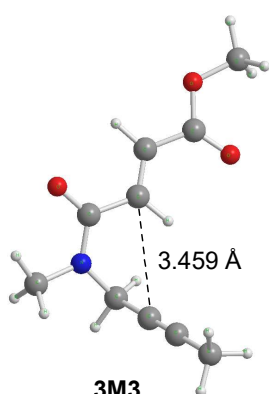

**3M3**

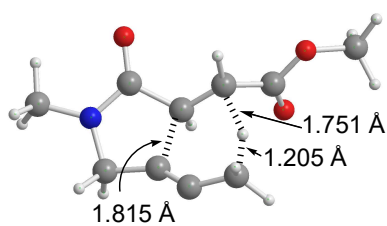

TS10

$$v^\ddagger = 490.6018i \text{ cm}^{-1}$$

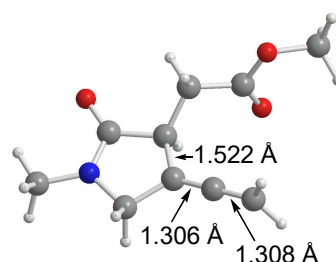

**10M2**

## I-6. Cartesian coordinates of the optimized geometries

Scheme 12

3M1 PhCCTS6pcm.for3.log

Standard orientation:

| Center Number | Atomic Number | Atomic Type | Coordinates (Angstroms) |           |           |
|---------------|---------------|-------------|-------------------------|-----------|-----------|
|               |               |             | X                       | Y         | Z         |
| 1             | 1             | 0           | 3.912434                | -0.542603 | -0.941143 |
| 2             | 6             | 0           | 3.209993                | -0.021359 | -0.299606 |
| 3             | 6             | 0           | 2.055996                | -0.594247 | 0.062588  |
| 4             | 1             | 0           | 1.367917                | -0.032288 | 0.685067  |
| 5             | 6             | 0           | 3.553954                | 1.347386  | 0.156996  |
| 6             | 6             | 0           | 1.705582                | -1.961780 | -0.437644 |
| 7             | 8             | 0           | 2.348795                | -2.479626 | -1.352473 |
| 8             | 7             | 0           | 0.640581                | -2.594380 | 0.155634  |
| 9             | 6             | 0           | -0.115035               | -2.057549 | 1.294526  |
| 10            | 1             | 0           | -0.473666               | -2.916204 | 1.875032  |
| 11            | 6             | 0           | -1.250506               | -1.209178 | 0.910963  |
| 12            | 6             | 0           | -2.174470               | -0.496002 | 0.580474  |
| 13            | 6             | 0           | -3.262044               | 0.348814  | 0.194860  |
| 14            | 1             | 0           | 0.560393                | -1.513404 | 1.961051  |
| 15            | 8             | 0           | 2.868116                | 2.047302  | 0.879296  |
| 16            | 8             | 0           | 4.749300                | 1.727636  | -0.340358 |
| 17            | 6             | 0           | 5.185970                | 3.046169  | 0.032302  |
| 18            | 1             | 0           | 6.154951                | 3.179632  | -0.448337 |
| 19            | 1             | 0           | 5.280689                | 3.124653  | 1.118417  |
| 20            | 1             | 0           | 4.474862                | 3.797715  | -0.320319 |
| 21            | 6             | 0           | 0.148701                | -3.846726 | -0.407597 |
| 22            | 1             | 0           | 0.245213                | -4.661677 | 0.320412  |
| 23            | 1             | 0           | 0.738583                | -4.081312 | -1.291727 |
| 24            | 1             | 0           | -0.907323               | -3.744294 | -0.684126 |
| 25            | 6             | 0           | -4.585988               | -0.130508 | 0.224261  |
| 26            | 6             | 0           | -5.641214               | 0.697554  | -0.150910 |
| 27            | 6             | 0           | -5.394519               | 2.010498  | -0.560476 |
| 28            | 6             | 0           | -4.084116               | 2.494487  | -0.593189 |
| 29            | 6             | 0           | -3.022950               | 1.673663  | -0.218881 |
| 30            | 1             | 0           | -4.774037               | -1.151362 | 0.542524  |
| 31            | 1             | 0           | -6.658651               | 0.317288  | -0.124093 |
| 32            | 1             | 0           | -6.219926               | 2.653693  | -0.852746 |
| 33            | 1             | 0           | -3.887778               | 3.514718  | -0.910953 |
| 34            | 1             | 0           | -2.003541               | 2.046283  | -0.242213 |

SCF Done: E(RB3LYP) = -860.994426995 A.U. after 1 cycles  
 Zero-point correction= 0.271403 (Hartree/Particle)  
 Thermal correction to Energy= 0.290628  
 Thermal correction to Enthalpy= 0.291572  
 Thermal correction to Gibbs Free Energy= 0.218696  
 Sum of electronic and zero-point Energies= -860.723024  
 Sum of electronic and thermal Energies= -860.703799  
 Sum of electronic and thermal Enthalpies= -860.702855  
 Sum of electronic and thermal Free Energies= -860.775731  
 SCF Done: E(RB3LYP) = -861.255694412 A.U. after 15 cycles

AM PhCCTS4pcm.for.log

Standard orientation:

| Center Number | Atomic Number | Atomic Type | Coordinates (Angstroms) |           |           |
|---------------|---------------|-------------|-------------------------|-----------|-----------|
|               |               |             | X                       | Y         | Z         |
| 1             | 1             | 0           | 2.997396                | -0.129256 | -1.503917 |
| 2             | 6             | 0           | 2.669752                | 0.101405  | -0.495750 |
| 3             | 6             | 0           | 1.930829                | -0.765452 | 0.207969  |
| 4             | 1             | 0           | 1.622919                | -0.510038 | 1.215329  |
| 5             | 6             | 0           | 3.061234                | 1.405653  | 0.088582  |
| 6             | 6             | 0           | 1.570349                | -2.094872 | -0.362971 |
| 7             | 8             | 0           | 2.176421                | -2.574018 | -1.320439 |
| 8             | 7             | 0           | 0.572064                | -2.805541 | 0.279738  |
| 9             | 6             | 0           | -0.392467               | -2.242578 | 1.155405  |
| 10            | 1             | 0           | -0.716421               | -2.927138 | 1.940155  |
| 11            | 6             | 0           | -0.902369               | -1.034753 | 1.076890  |

|    |   |   |           |           |           |
|----|---|---|-----------|-----------|-----------|
| 12 | 6 | 0 | -1.387783 | 0.187389  | 1.058582  |
| 13 | 6 | 0 | -2.628937 | 0.630031  | 0.396505  |
| 14 | 1 | 0 | -0.823277 | 0.969834  | 1.571329  |
| 15 | 8 | 0 | 2.732430  | 1.819286  | 1.186044  |
| 16 | 8 | 0 | 3.843517  | 2.096536  | -0.767575 |
| 17 | 6 | 0 | 4.287323  | 3.382722  | -0.302949 |
| 18 | 1 | 0 | 4.898163  | 3.789678  | -1.108642 |
| 19 | 1 | 0 | 4.877439  | 3.276386  | 0.611017  |
| 20 | 1 | 0 | 3.431879  | 4.033217  | -0.102738 |
| 21 | 6 | 0 | 0.342521  | -4.187777 | -0.143497 |
| 22 | 1 | 0 | -0.066476 | -4.751444 | 0.699897  |
| 23 | 1 | 0 | 1.288552  | -4.625098 | -0.460903 |
| 24 | 1 | 0 | -0.366255 | -4.236660 | -0.978843 |
| 25 | 6 | 0 | -3.460183 | -0.258016 | -0.308679 |
| 26 | 6 | 0 | -4.623489 | 0.197780  | -0.921085 |
| 27 | 6 | 0 | -4.980601 | 1.548402  | -0.841904 |
| 28 | 6 | 0 | -4.163393 | 2.439012  | -0.144220 |
| 29 | 6 | 0 | -2.996941 | 1.983098  | 0.469875  |
| 30 | 1 | 0 | -3.183686 | -1.307055 | -0.371512 |
| 31 | 1 | 0 | -5.255456 | -0.500532 | -1.463332 |
| 32 | 1 | 0 | -5.889395 | 1.901432  | -1.321457 |
| 33 | 1 | 0 | -4.432475 | 3.489691  | -0.077517 |
| 34 | 1 | 0 | -2.361359 | 2.679073  | 1.012217  |

```

-----
SCF Done: E(RB3LYP) = -861.000464082 A.U. after 1 cycles
Zero-point correction= 0.270711 (Hartree/Particle)
Thermal correction to Energy= 0.289617
Thermal correction to Enthalpy= 0.290561
Thermal correction to Gibbs Free Energy= 0.219991
Sum of electronic and zero-point Energies= -860.729753
Sum of electronic and thermal Energies= -860.710847
Sum of electronic and thermal Enthalpies= -860.709903
Sum of electronic and thermal Free Energies= -860.780473
SCF Done: E(RB3LYP) = -861.259533173 A.U. after 15 cycles

```

TS1 PhCCTS4pcm.log

Standard orientation:

| Center<br>Number | Atomic<br>Number | Atomic<br>Type | Coordinates (Angstroms) |           |           |
|------------------|------------------|----------------|-------------------------|-----------|-----------|
|                  |                  |                | X                       | Y         | Z         |
| 1                | 1                | 0              | 0.476137                | 1.415735  | -1.394588 |
| 2                | 6                | 0              | 0.370184                | 1.242778  | -0.330136 |
| 3                | 6                | 0              | 1.379576                | 0.630407  | 0.427903  |
| 4                | 1                | 0              | 1.280578                | 0.820177  | 1.499058  |
| 5                | 6                | 0              | -0.817080               | 1.732772  | 0.346483  |
| 6                | 6                | 0              | 2.829733                | 0.749060  | -0.038243 |
| 7                | 8                | 0              | 3.392980                | 1.807937  | -0.268907 |
| 8                | 7                | 0              | 3.426508                | -0.488453 | -0.117960 |
| 9                | 6                | 0              | 2.553527                | -1.550036 | 0.148191  |
| 10               | 1                | 0              | 2.915827                | -2.552043 | -0.058493 |
| 11               | 6                | 0              | 1.310612                | -1.245949 | 0.522800  |
| 12               | 6                | 0              | 0.139999                | -1.813054 | 0.975830  |
| 13               | 6                | 0              | -1.104936               | -1.656393 | 0.294291  |
| 14               | 1                | 0              | 0.106759                | -2.246445 | 1.977078  |
| 15               | 8                | 0              | -1.043547               | 1.619098  | 1.546904  |
| 16               | 8                | 0              | -1.669392               | 2.363359  | -0.508275 |
| 17               | 6                | 0              | -2.857670               | 2.889979  | 0.094676  |
| 18               | 1                | 0              | -3.425235               | 3.342565  | -0.719801 |
| 19               | 1                | 0              | -2.610948               | 3.643538  | 0.848437  |
| 20               | 1                | 0              | -3.438574               | 2.093641  | 0.567828  |
| 21               | 6                | 0              | 4.804503                | -0.670040 | -0.541869 |
| 22               | 1                | 0              | 5.399130                | -1.132853 | 0.253032  |
| 23               | 1                | 0              | 5.210018                | 0.316748  | -0.766978 |
| 24               | 1                | 0              | 4.855136                | -1.297959 | -1.438580 |
| 25               | 6                | 0              | -1.156532               | -1.136296 | -1.025200 |
| 26               | 6                | 0              | -2.387549               | -0.921986 | -1.654067 |
| 27               | 6                | 0              | -3.572250               | -1.227848 | -0.993505 |
| 28               | 6                | 0              | -3.538552               | -1.767617 | 0.307577  |
| 29               | 6                | 0              | -2.329143               | -1.977825 | 0.941289  |
| 30               | 1                | 0              | -0.233216               | -0.995882 | -1.572602 |
| 31               | 1                | 0              | -2.412656               | -0.526258 | -2.665277 |
| 32               | 1                | 0              | -4.527473               | -1.066710 | -1.485656 |
| 33               | 1                | 0              | -4.467524               | -2.012457 | 0.814949  |

```

34          1          0      -2.300372  -2.373481  1.953405
-----
SCF Done:  E(RB3LYP) = -860.969728322      A.U. after   1 cycles
Zero-point correction=                0.269576 (Hartree/Particle)
Thermal correction to Energy=         0.287342
Thermal correction to Enthalpy=       0.288286
Thermal correction to Gibbs Free Energy= 0.222691
Sum of electronic and zero-point Energies= -860.700153
Sum of electronic and thermal Energies= -860.682386
Sum of electronic and thermal Enthalpies= -860.681442
Sum of electronic and thermal Free Energies= -860.747037
SCF Done:  E(RB3LYP) = -861.228970358      A.U. after  17 cycles

```

M1 PhCCTS4pcm.rev.log  
Standard orientation:

| Center Number | Atomic Number | Atomic Type | Coordinates (Angstroms) |           |           |
|---------------|---------------|-------------|-------------------------|-----------|-----------|
|               |               |             | X                       | Y         | Z         |
| 1             | 1             | 0           | 0.099332                | 1.184691  | -1.320206 |
| 2             | 6             | 0           | -0.129653               | 0.627398  | -0.406801 |
| 3             | 6             | 0           | 1.168999                | 0.258406  | 0.334674  |
| 4             | 1             | 0           | 1.090698                | 0.686762  | 1.345856  |
| 5             | 6             | 0           | -1.000658               | 1.524878  | 0.465875  |
| 6             | 6             | 0           | 2.492251                | 0.788704  | -0.218272 |
| 7             | 8             | 0           | 2.735531                | 1.893258  | -0.680524 |
| 8             | 7             | 0           | 3.407268                | -0.240388 | -0.044548 |
| 9             | 6             | 0           | 2.756281                | -1.423275 | 0.354986  |
| 10            | 1             | 0           | 3.329573                | -2.338930 | 0.432236  |
| 11            | 6             | 0           | 1.432089                | -1.221853 | 0.532586  |
| 12            | 6             | 0           | 0.317177                | -2.087237 | 0.809895  |
| 13            | 6             | 0           | -0.883165               | -1.780015 | 0.240602  |
| 14            | 1             | 0           | 0.422827                | -2.958326 | 1.453535  |
| 15            | 8             | 0           | -1.037043               | 1.502615  | 1.679560  |
| 16            | 8             | 0           | -1.751630               | 2.353369  | -0.284255 |
| 17            | 6             | 0           | -2.664312               | 3.197616  | 0.442538  |
| 18            | 1             | 0           | -3.171653               | 3.796641  | -0.313541 |
| 19            | 1             | 0           | -2.117434               | 3.838438  | 1.138230  |
| 20            | 1             | 0           | -3.382697               | 2.590431  | 0.998790  |
| 21            | 6             | 0           | 4.802611                | -0.144291 | -0.428655 |
| 22            | 1             | 0           | 5.457132                | -0.348551 | 0.425583  |
| 23            | 1             | 0           | 4.974753                | 0.874568  | -0.779350 |
| 24            | 1             | 0           | 5.039504                | -0.847675 | -1.235613 |
| 25            | 6             | 0           | -0.915377               | -0.681012 | -0.829536 |
| 26            | 6             | 0           | -2.294271               | -0.395180 | -1.369855 |
| 27            | 6             | 0           | -3.370992               | -1.121408 | -1.019904 |
| 28            | 6             | 0           | -3.273693               | -2.215417 | -0.064030 |
| 29            | 6             | 0           | -2.092247               | -2.518300 | 0.526638  |
| 30            | 1             | 0           | -0.314420               | -1.061631 | -1.673537 |
| 31            | 1             | 0           | -2.382965               | 0.418854  | -2.083789 |
| 32            | 1             | 0           | -4.342001               | -0.899617 | -1.456137 |
| 33            | 1             | 0           | -4.169993               | -2.778879 | 0.179951  |
| 34            | 1             | 0           | -2.028628               | -3.322090 | 1.257135  |

```

SCF Done:  E(RB3LYP) = -861.021504772      A.U. after   1 cycles
Zero-point correction=                0.274408 (Hartree/Particle)
Thermal correction to Energy=         0.291307
Thermal correction to Enthalpy=       0.292251
Thermal correction to Gibbs Free Energy= 0.228807
Sum of electronic and zero-point Energies= -860.747097
Sum of electronic and thermal Energies= -860.730198
Sum of electronic and thermal Enthalpies= -860.729254
Sum of electronic and thermal Free Energies= -860.792698
SCF Done:  E(RB3LYP) = -861.276209196      A.U. after  15 cycles

```

TS2 PhCCTS6pcm.log  
Standard orientation:

| Center Number | Atomic Number | Atomic Type | Coordinates (Angstroms) |          |          |
|---------------|---------------|-------------|-------------------------|----------|----------|
|               |               |             | X                       | Y        | Z        |
| 1             | 1             | 0           | -0.260992               | 1.176671 | 1.368754 |
| 2             | 6             | 0           | -0.073553               | 0.835594 | 0.356954 |



|    |   |   |           |           |           |
|----|---|---|-----------|-----------|-----------|
| 3  | 6 | 0 | -1.176486 | 0.286921  | -0.417031 |
| 4  | 1 | 0 | -1.007745 | 0.478184  | -1.483125 |
| 5  | 6 | 0 | 1.019249  | 1.491511  | -0.356396 |
| 6  | 6 | 0 | -2.570517 | 0.834257  | -0.027564 |
| 7  | 8 | 0 | -2.829956 | 2.018304  | 0.131285  |
| 8  | 7 | 0 | -3.468242 | -0.188112 | 0.065430  |
| 9  | 6 | 0 | -2.939384 | -1.521762 | -0.151054 |
| 10 | 1 | 0 | -3.195985 | -2.187304 | 0.684306  |
| 11 | 6 | 0 | -1.450475 | -1.320145 | -0.268312 |
| 12 | 6 | 0 | -0.423657 | -2.102481 | -0.225858 |
| 13 | 6 | 0 | 0.913954  | -1.894434 | 0.028480  |
| 14 | 1 | 0 | -3.358954 | -1.966227 | -1.066898 |
| 15 | 8 | 0 | 1.246295  | 1.401043  | -1.555214 |
| 16 | 8 | 0 | 1.785157  | 2.239216  | 0.483018  |
| 17 | 6 | 0 | 2.879342  | 2.928074  | -0.137151 |
| 18 | 1 | 0 | 3.392094  | 3.451866  | 0.670752  |
| 19 | 1 | 0 | 2.515104  | 3.642805  | -0.880581 |
| 20 | 1 | 0 | 3.555865  | 2.221840  | -0.625418 |
| 21 | 6 | 0 | -4.877087 | 0.029350  | 0.322464  |
| 22 | 1 | 0 | -5.486267 | -0.321674 | -0.520128 |
| 23 | 1 | 0 | -5.031344 | 1.100340  | 0.459667  |
| 24 | 1 | 0 | -5.192601 | -0.504318 | 1.227515  |
| 25 | 6 | 0 | 1.201941  | -1.047791 | 1.160935  |
| 26 | 6 | 0 | 2.548937  | -0.683570 | 1.430388  |
| 27 | 6 | 0 | 3.549319  | -1.059080 | 0.564445  |
| 28 | 6 | 0 | 3.262235  | -1.857124 | -0.581577 |
| 29 | 6 | 0 | 1.983180  | -2.278182 | -0.840521 |
| 30 | 1 | 0 | 0.470140  | -0.979751 | 1.954322  |
| 31 | 1 | 0 | 2.777552  | -0.114346 | 2.326124  |
| 32 | 1 | 0 | 4.578875  | -0.776574 | 0.766970  |
| 33 | 1 | 0 | 4.071400  | -2.134434 | -1.251187 |
| 34 | 1 | 0 | 1.756584  | -2.885642 | -1.711007 |

```

-----
SCF Done: E(RB3LYP) = -860.942136252      A.U. after 1 cycles
Zero-point correction=                    0.271239 (Hartree/Particle)
Thermal correction to Energy=             0.288370
Thermal correction to Enthalpy=           0.289314
Thermal correction to Gibbs Free Energy=  0.225753
Sum of electronic and zero-point Energies= -860.670897
Sum of electronic and thermal Energies=   -860.653767
Sum of electronic and thermal Enthalpies= -860.652822
Sum of electronic and thermal Free Energies= -860.716384
SCF Done: E(RB3LYP) = -861.201013082      A.U. after 16 cycles

```

M2 PhCCTS6pcm.rev.log

Standard orientation:

| Center<br>Number | Atomic<br>Number | Atomic<br>Type | Coordinates (Angstroms) |           |           |
|------------------|------------------|----------------|-------------------------|-----------|-----------|
|                  |                  |                | X                       | Y         | Z         |
| 1                | 1                | 0              | -0.133723               | 1.183354  | 1.201231  |
| 2                | 6                | 0              | 0.141053                | 0.549348  | 0.354823  |
| 3                | 6                | 0              | -1.132415               | 0.257587  | -0.489677 |
| 4                | 1                | 0              | -0.992782               | 0.694014  | -1.486014 |
| 5                | 6                | 0              | 1.166529                | 1.308680  | -0.471687 |
| 6                | 6                | 0              | -2.418159               | 0.860438  | 0.101812  |
| 7                | 8                | 0              | -2.544832               | 2.004215  | 0.522804  |
| 8                | 7                | 0              | -3.401788               | -0.087023 | 0.056308  |
| 9                | 6                | 0              | -2.975431               | -1.399163 | -0.419189 |
| 10               | 1                | 0              | -3.242739               | -2.188471 | 0.297076  |
| 11               | 6                | 0              | -1.482776               | -1.231078 | -0.566444 |
| 12               | 6                | 0              | -0.476340               | -2.081344 | -0.523906 |
| 13               | 6                | 0              | 0.785760                | -1.849033 | -0.104418 |
| 14               | 1                | 0              | -3.465672               | -1.643559 | -1.374932 |
| 15               | 8                | 0              | 1.370318                | 1.148131  | -1.657950 |
| 16               | 8                | 0              | 1.843006                | 2.193177  | 0.287276  |
| 17               | 6                | 0              | 2.884263                | 2.923094  | -0.386648 |
| 18               | 1                | 0              | 3.296617                | 3.600541  | 0.361102  |
| 19               | 1                | 0              | 2.472993                | 3.484194  | -1.229102 |
| 20               | 1                | 0              | 3.654076                | 2.238036  | -0.751031 |
| 21               | 6                | 0              | -4.769101               | 0.175228  | 0.452778  |
| 22               | 1                | 0              | -5.456921               | 0.010275  | -0.386161 |
| 23               | 1                | 0              | -4.831754               | 1.216177  | 0.773733  |
| 24               | 1                | 0              | -5.067912               | -0.478922 | 1.281568  |
| 25               | 6                | 0              | 0.821583                | -0.779546 | 0.989855  |

|    |   |   |          |           |           |
|----|---|---|----------|-----------|-----------|
| 26 | 6 | 0 | 2.186991 | -0.543082 | 1.564203  |
| 27 | 6 | 0 | 3.291018 | -1.081491 | 1.006542  |
| 28 | 6 | 0 | 3.210492 | -1.952877 | -0.152619 |
| 29 | 6 | 0 | 2.011955 | -2.332296 | -0.672841 |
| 30 | 1 | 0 | 0.142241 | -1.049520 | 1.805319  |
| 31 | 1 | 0 | 2.258874 | 0.058402  | 2.466814  |
| 32 | 1 | 0 | 4.268537 | -0.896243 | 1.444703  |
| 33 | 1 | 0 | 4.134271 | -2.320534 | -0.590849 |
| 34 | 1 | 0 | 1.955931 | -3.009559 | -1.520157 |

```

-----
SCF Done: E(RB3LYP) = -860.963197763 A.U. after 1 cycles
Zero-point correction= 0.274055 (Hartree/Particle)
Thermal correction to Energy= 0.291056
Thermal correction to Enthalpy= 0.292000
Thermal correction to Gibbs Free Energy= 0.228721
Sum of electronic and zero-point Energies= -860.689143
Sum of electronic and thermal Energies= -860.672142
Sum of electronic and thermal Enthalpies= -860.671197
Sum of electronic and thermal Free Energies= -860.734476
SCF Done: E(RB3LYP) = -861.219516401 A.U. after 16 cycles

```

Scheme 13  
3Ml+H++H2O PhCCHwTS3pcm.rev.log

Standard orientation:

| Center<br>Number | Atomic<br>Number | Atomic<br>Type | Coordinates (Angstroms) |           |           |
|------------------|------------------|----------------|-------------------------|-----------|-----------|
|                  |                  |                | X                       | Y         | Z         |
| 1                | 7                | 0              | -2.488090               | -1.318989 | -0.233171 |
| 2                | 6                | 0              | -1.598186               | -1.495489 | 0.932795  |
| 3                | 6                | 0              | -0.191531               | -1.228484 | 0.627940  |
| 4                | 6                | 0              | -1.312529               | 0.756967  | -0.878678 |
| 5                | 6                | 0              | -2.379880               | -0.282216 | -1.084305 |
| 6                | 6                | 0              | 0.994897                | -1.063878 | 0.423084  |
| 7                | 6                | 0              | -1.506723               | 1.853199  | -0.103582 |
| 8                | 8                | 0              | -3.093978               | -0.079330 | -2.071894 |
| 9                | 6                | 0              | -3.585717               | -2.274412 | -0.393666 |
| 10               | 1                | 0              | -4.345522               | -2.115866 | 0.380654  |
| 11               | 1                | 0              | -3.196627               | -3.291201 | -0.306504 |
| 12               | 1                | 0              | -4.035441               | -2.122561 | -1.374039 |
| 13               | 6                | 0              | -0.570702               | 2.935044  | -0.120508 |
| 14               | 6                | 0              | 2.384747                | -0.852600 | 0.169757  |
| 15               | 6                | 0              | 3.113252                | 0.084071  | 0.930327  |
| 16               | 6                | 0              | 4.468985                | 0.284612  | 0.682045  |
| 17               | 6                | 0              | 5.114872                | -0.439060 | -0.324782 |
| 18               | 6                | 0              | 4.399378                | -1.369095 | -1.084707 |
| 19               | 6                | 0              | 3.043989                | -1.579350 | -0.841933 |
| 20               | 8                | 0              | -0.666675               | 4.022959  | 0.568723  |
| 21               | 8                | 0              | 0.486757                | 2.847756  | -0.877833 |
| 22               | 6                | 0              | -1.792559               | 4.288295  | 1.464504  |
| 23               | 1                | 0              | -1.806444               | 3.539761  | 2.256667  |
| 24               | 1                | 0              | -2.718765               | 4.294036  | 0.889906  |
| 25               | 1                | 0              | -1.582935               | 5.274811  | 1.869482  |
| 26               | 1                | 0              | -0.461456               | 0.700189  | -1.550129 |
| 27               | 1                | 0              | -2.368668               | 1.940600  | 0.545288  |
| 28               | 1                | 0              | -1.706321               | -2.540868 | 1.247544  |
| 29               | 1                | 0              | -1.935036               | -0.864620 | 1.766279  |
| 30               | 1                | 0              | 2.608105                | 0.644930  | 1.710572  |
| 31               | 1                | 0              | 5.022676                | 1.007394  | 1.274337  |
| 32               | 1                | 0              | 6.172055                | -0.279082 | -0.516189 |
| 33               | 1                | 0              | 4.898759                | -1.932871 | -1.867363 |
| 34               | 1                | 0              | 2.485639                | -2.302141 | -1.428672 |
| 35               | 1                | 0              | 1.040641                | 3.652378  | -0.803088 |
| 36               | 8                | 0              | -1.863481               | -4.820431 | 1.322494  |
| 37               | 1                | 0              | -0.903458               | -4.955018 | 1.367337  |
| 38               | 1                | 0              | -2.145318               | -4.890205 | 2.248452  |

```

-----
SCF Done: E(RB3LYP) = -937.821674796 A.U. after 1 cycles
Zero-point correction= 0.306411 (Hartree/Particle)
Thermal correction to Energy= 0.330104
Thermal correction to Enthalpy= 0.331048
Thermal correction to Gibbs Free Energy= 0.248189
Sum of electronic and zero-point Energies= -937.515264
Sum of electronic and thermal Energies= -937.491571

```

Sum of electronic and thermal Enthalpies= -937.490627  
 Sum of electronic and thermal Free Energies= -937.573486  
 SCF Done: E(RB3LYP) = -938.118821628 A.U. after 17 cycles

TS3 PhCCHwTS3pcm.log  
 Standard orientation:

| Center Number | Atomic Number | Atomic Type | Coordinates (Angstroms) |           |           |
|---------------|---------------|-------------|-------------------------|-----------|-----------|
|               |               |             | X                       | Y         | Z         |
| 1             | 7             | 0           | -2.937241               | -0.561111 | 0.072412  |
| 2             | 6             | 0           | -1.955439               | -1.162067 | 0.970636  |
| 3             | 6             | 0           | -0.596247               | -0.862499 | 0.463952  |
| 4             | 6             | 0           | -1.070174               | 0.794530  | -0.694130 |
| 5             | 6             | 0           | -2.531362               | 0.375748  | -0.803529 |
| 6             | 6             | 0           | 0.609551                | -1.114643 | 0.359614  |
| 7             | 6             | 0           | -0.785443               | 1.988259  | -0.020469 |
| 8             | 8             | 0           | -3.224093               | 0.934738  | -1.652463 |
| 9             | 6             | 0           | -4.323487               | -1.001808 | 0.146474  |
| 10            | 1             | 0           | -4.759994               | -0.722542 | 1.112326  |
| 11            | 1             | 0           | -4.370680               | -2.088595 | 0.033222  |
| 12            | 1             | 0           | -4.877544               | -0.514524 | -0.655912 |
| 13            | 6             | 0           | 0.393758                | 2.690924  | -0.264405 |
| 14            | 6             | 0           | 1.996191                | -1.269632 | 0.172288  |
| 15            | 6             | 0           | 2.906413                | -0.640716 | 1.055467  |
| 16            | 6             | 0           | 4.273527                | -0.803567 | 0.870354  |
| 17            | 6             | 0           | 4.749615                | -1.586317 | -0.188284 |
| 18            | 6             | 0           | 3.857641                | -2.213570 | -1.066307 |
| 19            | 6             | 0           | 2.487671                | -2.063509 | -0.891426 |
| 20            | 8             | 0           | 0.747322                | 3.830965  | 0.278387  |
| 21            | 8             | 0           | 1.282922                | 2.211472  | -1.115591 |
| 22            | 6             | 0           | -0.128959               | 4.506924  | 1.217140  |
| 23            | 1             | 0           | -0.284080               | 3.879902  | 2.097043  |
| 24            | 1             | 0           | -1.076129               | 4.747673  | 0.731074  |
| 25            | 1             | 0           | 0.403561                | 5.416103  | 1.487115  |
| 26            | 1             | 0           | -0.468348               | 0.545384  | -1.562115 |
| 27            | 1             | 0           | -1.471621               | 2.369277  | 0.724244  |
| 28            | 1             | 0           | -2.117348               | -2.247284 | 0.991007  |
| 29            | 1             | 0           | -2.075192               | -0.773379 | 1.991535  |
| 30            | 1             | 0           | 2.524229                | -0.037038 | 1.872000  |
| 31            | 1             | 0           | 4.971797                | -0.321923 | 1.547672  |
| 32            | 1             | 0           | 5.819478                | -1.709162 | -0.328569 |
| 33            | 1             | 0           | 4.234714                | -2.819617 | -1.884095 |
| 34            | 1             | 0           | 1.785691                | -2.546521 | -1.563107 |
| 35            | 1             | 0           | 2.038424                | 2.826068  | -1.192584 |
| 36            | 8             | 0           | -3.026795               | -4.299422 | 0.552617  |
| 37            | 1             | 0           | -2.231148               | -4.693265 | 0.160612  |
| 38            | 1             | 0           | -3.019512               | -4.633148 | 1.463785  |

SCF Done: E(RB3LYP) = -937.816612331 A.U. after 1 cycles  
 Zero-point correction= 0.305674 (Hartree/Particle)  
 Thermal correction to Energy= 0.328555  
 Thermal correction to Enthalpy= 0.329500  
 Thermal correction to Gibbs Free Energy= 0.249165  
 Sum of electronic and zero-point Energies= -937.510938  
 Sum of electronic and thermal Energies= -937.488057  
 Sum of electronic and thermal Enthalpies= -937.487113  
 Sum of electronic and thermal Free Energies= -937.567447  
 SCF Done: E(RB3LYP) = -938.111554393 A.U. after 16 cycles

BM1+H++H2O PhCCHwTS3pcm.for.log  
 Standard orientation:

| Center Number | Atomic Number | Atomic Type | Coordinates (Angstroms) |           |           |
|---------------|---------------|-------------|-------------------------|-----------|-----------|
|               |               |             | X                       | Y         | Z         |
| 1             | 7             | 0           | -2.383038               | -1.657389 | 0.149873  |
| 2             | 6             | 0           | -1.139240               | -1.741118 | 0.898491  |
| 3             | 6             | 0           | -0.259958               | -0.704827 | 0.212910  |
| 4             | 6             | 0           | -1.216964               | 0.272535  | -0.598613 |
| 5             | 6             | 0           | -2.482043               | -0.616135 | -0.710001 |

|    |   |   |           |           |           |
|----|---|---|-----------|-----------|-----------|
| 6  | 6 | 0 | 1.010788  | -0.606972 | 0.163691  |
| 7  | 6 | 0 | -1.505267 | 1.546399  | 0.098887  |
| 8  | 8 | 0 | -3.421603 | -0.360904 | -1.452575 |
| 9  | 6 | 0 | -3.424313 | -2.655706 | 0.325878  |
| 10 | 1 | 0 | -3.847146 | -2.597390 | 1.335624  |
| 11 | 1 | 0 | -3.009291 | -3.655804 | 0.169465  |
| 12 | 1 | 0 | -4.207457 | -2.454307 | -0.406423 |
| 13 | 6 | 0 | -0.982358 | 2.725443  | -0.325061 |
| 14 | 6 | 0 | 2.366061  | -0.401505 | 0.087526  |
| 15 | 6 | 0 | 3.012565  | 0.445871  | 1.040535  |
| 16 | 6 | 0 | 4.377582  | 0.647901  | 0.957342  |
| 17 | 6 | 0 | 5.113858  | 0.020879  | -0.060583 |
| 18 | 6 | 0 | 4.495905  | -0.815144 | -1.004974 |
| 19 | 6 | 0 | 3.132803  | -1.034060 | -0.939816 |
| 20 | 8 | 0 | -1.185176 | 3.938410  | 0.203043  |
| 21 | 8 | 0 | -0.156029 | 2.781817  | -1.384329 |
| 22 | 6 | 0 | -2.066615 | 4.065298  | 1.330942  |
| 23 | 1 | 0 | -1.677691 | 3.502559  | 2.184600  |
| 24 | 1 | 0 | -3.069832 | 3.714718  | 1.071803  |
| 25 | 1 | 0 | -2.088802 | 5.129086  | 1.563326  |
| 26 | 1 | 0 | -0.800980 | 0.445322  | -1.591441 |
| 27 | 1 | 0 | -2.131829 | 1.526456  | 0.980525  |
| 28 | 1 | 0 | -0.718350 | -2.749839 | 0.834501  |
| 29 | 1 | 0 | -1.285288 | -1.478324 | 1.955314  |
| 30 | 1 | 0 | 2.418166  | 0.917033  | 1.815458  |
| 31 | 1 | 0 | 4.879803  | 1.288662  | 1.673937  |
| 32 | 1 | 0 | 6.185619  | 0.185191  | -0.118649 |
| 33 | 1 | 0 | 5.088566  | -1.287066 | -1.781087 |
| 34 | 1 | 0 | 2.629621  | -1.675673 | -1.654737 |
| 35 | 1 | 0 | 0.061894  | 3.715081  | -1.559141 |
| 36 | 8 | 0 | -0.733873 | -5.037276 | 0.431756  |
| 37 | 1 | 0 | 0.082851  | -5.090328 | -0.089585 |
| 38 | 1 | 0 | -0.451984 | -5.303184 | 1.321316  |

```

-----
SCF Done: E(RB3LYP) = -937.826490416 A.U. after 1 cycles
Zero-point correction= 0.306852 (Hartree/Particle)
Thermal correction to Energy= 0.329827
Thermal correction to Enthalpy= 0.330771
Thermal correction to Gibbs Free Energy= 0.250478
Sum of electronic and zero-point Energies= -937.519639
Sum of electronic and thermal Energies= -937.496664
Sum of electronic and thermal Enthalpies= -937.495719
Sum of electronic and thermal Free Energies= -937.576012
SCF Done: E(RB3LYP) = -938.121627182 A.U. after 16 cycles

```

CM1+H+ PhCCHwlpcm.log  
Standard orientation:

| Center<br>Number | Atomic<br>Number | Atomic<br>Type | Coordinates (Angstroms) |           |           |
|------------------|------------------|----------------|-------------------------|-----------|-----------|
|                  |                  |                | X                       | Y         | Z         |
| 1                | 7                | 0              | 3.344142                | -0.570236 | 0.008287  |
| 2                | 6                | 0              | 2.452560                | -1.695076 | -0.215302 |
| 3                | 6                | 0              | 1.073561                | -1.098117 | -0.012307 |
| 4                | 6                | 0              | 1.205895                | 0.359719  | 0.412951  |
| 5                | 6                | 0              | 2.731514                | 0.597903  | 0.341333  |
| 6                | 6                | 0              | -0.080307               | -1.728147 | -0.184496 |
| 7                | 6                | 0              | 0.409864                | 1.351226  | -0.386906 |
| 8                | 8                | 0              | 3.290154                | 1.665852  | 0.564017  |
| 9                | 6                | 0              | 4.781331                | -0.716417 | -0.112811 |
| 10               | 1                | 0              | 5.053346                | -1.037310 | -1.125147 |
| 11               | 1                | 0              | 5.157872                | -1.455926 | 0.603584  |
| 12               | 1                | 0              | 5.234456                | 0.253731  | 0.095189  |
| 13               | 6                | 0              | -0.426377               | 2.232065  | 0.191477  |
| 14               | 6                | 0              | -1.488711               | -1.383775 | 0.028699  |
| 15               | 6                | 0              | -2.398778               | -1.367354 | -1.044246 |
| 16               | 6                | 0              | -3.734952               | -1.045983 | -0.819723 |
| 17               | 6                | 0              | -4.172854               | -0.732814 | 0.470936  |
| 18               | 6                | 0              | -3.274249               | -0.746001 | 1.539908  |
| 19               | 6                | 0              | -1.937109               | -1.077330 | 1.324568  |
| 20               | 8                | 0              | -1.197172               | 3.156733  | -0.421263 |
| 21               | 8                | 0              | -0.593353               | 2.292174  | 1.534949  |
| 22               | 6                | 0              | -1.211950               | 3.180771  | -1.852175 |
| 23               | 1                | 0              | -1.539091               | 2.214206  | -2.249319 |

|    |   |   |           |           |           |
|----|---|---|-----------|-----------|-----------|
| 24 | 1 | 0 | -0.220230 | 3.427459  | -2.245465 |
| 25 | 1 | 0 | -1.923561 | 3.958852  | -2.127850 |
| 26 | 1 | 0 | 0.932814  | 0.454347  | 1.471004  |
| 27 | 1 | 0 | 0.542972  | 1.360764  | -1.460699 |
| 28 | 1 | 0 | 2.647785  | -2.507704 | 0.498314  |
| 29 | 1 | 0 | 2.585123  | -2.106195 | -1.224821 |
| 30 | 1 | 0 | -2.058736 | -1.589798 | -2.051781 |
| 31 | 1 | 0 | -4.432425 | -1.031468 | -1.651608 |
| 32 | 1 | 0 | -5.214895 | -0.478866 | 0.641863  |
| 33 | 1 | 0 | -3.614603 | -0.507285 | 2.542891  |
| 34 | 1 | 0 | -1.239268 | -1.104591 | 2.155210  |
| 35 | 1 | 0 | -1.332654 | 2.897383  | 1.718624  |
| 36 | 8 | 0 | 0.117981  | -3.170417 | -0.669375 |
| 37 | 1 | 0 | -0.447759 | -3.807325 | -0.175900 |
| 38 | 1 | 0 | -0.057635 | -3.287365 | -1.630159 |

-----  
SCF Done: E(RB3LYP) = -937.838474774 A.U. after 1 cycles  
Zero-point correction= 0.311799 (Hartree/Particle)  
Thermal correction to Energy= 0.332160  
Thermal correction to Enthalpy= 0.333104  
Thermal correction to Gibbs Free Energy= 0.261272  
Sum of electronic and zero-point Energies= -937.526675  
Sum of electronic and thermal Energies= -937.506315  
Sum of electronic and thermal Enthalpies= -937.505371  
Sum of electronic and thermal Free Energies= -937.577203  
SCF Done: E(RB3LYP) = -938.126500910 A.U. after 15 cycles

5Mt+H+ PhCCHwtpcm.log  
Standard orientation:

| Center<br>Number | Atomic<br>Number | Atomic<br>Type | Coordinates (Angstroms) |           |           |
|------------------|------------------|----------------|-------------------------|-----------|-----------|
|                  |                  |                | X                       | Y         | Z         |
| 1                | 7                | 0              | 2.964073                | -1.516855 | -0.186832 |
| 2                | 6                | 0              | 1.614913                | -2.015216 | 0.018555  |
| 3                | 6                | 0              | 0.739719                | -0.727467 | -0.122337 |
| 4                | 6                | 0              | 1.713724                | 0.417932  | 0.268815  |
| 5                | 6                | 0              | 3.095767                | -0.172715 | -0.041396 |
| 6                | 6                | 0              | -0.494734               | -0.793777 | 0.717530  |
| 7                | 6                | 0              | 1.486320                | 1.747413  | -0.444877 |
| 8                | 8                | 0              | 4.135477                | 0.473242  | -0.120818 |
| 9                | 6                | 0              | 4.087606                | -2.419808 | -0.355991 |
| 10               | 1                | 0              | 3.939366                | -3.052653 | -1.237338 |
| 11               | 1                | 0              | 4.208187                | -3.061768 | 0.524737  |
| 12               | 1                | 0              | 4.985627                | -1.814549 | -0.487997 |
| 13               | 6                | 0              | 0.163226                | 2.382438  | -0.080689 |
| 14               | 6                | 0              | -1.829403               | -0.998790 | 0.214895  |
| 15               | 6                | 0              | -2.035345               | -1.430007 | -1.116840 |
| 16               | 6                | 0              | -3.321822               | -1.672180 | -1.580132 |
| 17               | 6                | 0              | -4.418780               | -1.465570 | -0.738920 |
| 18               | 6                | 0              | -4.232428               | -1.020282 | 0.576657  |
| 19               | 6                | 0              | -2.952363               | -0.793780 | 1.054525  |
| 20               | 8                | 0              | 0.089163                | 3.649799  | -0.489348 |
| 21               | 8                | 0              | -0.741909               | 1.805127  | 0.504004  |
| 22               | 6                | 0              | -1.153591               | 4.340876  | -0.226284 |
| 23               | 1                | 0              | -1.333604               | 4.395119  | 0.849403  |
| 24               | 1                | 0              | -1.983015               | 3.824450  | -0.713926 |
| 25               | 1                | 0              | -1.021850               | 5.337658  | -0.644307 |
| 26               | 1                | 0              | 1.678452                | 0.579949  | 1.352691  |
| 27               | 1                | 0              | 1.514036                | 1.618908  | -1.534953 |
| 28               | 1                | 0              | 1.510119                | -2.476527 | 1.008839  |
| 29               | 1                | 0              | 1.352460                | -2.759561 | -0.738542 |
| 30               | 1                | 0              | -1.196397               | -1.606981 | -1.778625 |
| 31               | 1                | 0              | -3.470282               | -2.018729 | -2.597084 |
| 32               | 1                | 0              | -5.423623               | -1.644839 | -1.108525 |
| 33               | 1                | 0              | -5.087588               | -0.844184 | 1.220029  |
| 34               | 1                | 0              | -2.840839               | -0.408732 | 2.064192  |
| 35               | 1                | 0              | 2.299578                | 2.437119  | -0.199136 |
| 36               | 8                | 0              | -0.243253               | -0.761226 | 1.991714  |
| 37               | 1                | 0              | -1.033903               | -0.892605 | 2.551826  |
| 38               | 1                | 0              | 0.462078                | -0.604033 | -1.168941 |

-----  
SCF Done: E(RB3LYP) = -937.939109500 A.U. after 1 cycles  
Zero-point correction= 0.315284 (Hartree/Particle)

Thermal correction to Energy= 0.334552  
 Thermal correction to Enthalpy= 0.335496  
 Thermal correction to Gibbs Free Energy= 0.265980  
 Sum of electronic and zero-point Energies= -937.623825  
 Sum of electronic and thermal Energies= -937.604557  
 Sum of electronic and thermal Enthalpies= -937.603613  
 Sum of electronic and thermal Free Energies= -937.673130  
 SCF Done: E(RB3LYP) = -938.211682078 A.U. after 16 cycles

5Mc+H+ PhCCHwcpm.log  
 Standard orientation:

| Center Number | Atomic Number | Atomic Type | Coordinates (Angstroms) |           |           |
|---------------|---------------|-------------|-------------------------|-----------|-----------|
|               |               |             | X                       | Y         | Z         |
| 1             | 7             | 0           | -2.895261               | -1.370665 | -0.349024 |
| 2             | 6             | 0           | -1.726646               | -1.725899 | -1.133511 |
| 3             | 6             | 0           | -0.693415               | -0.590316 | -0.813946 |
| 4             | 6             | 0           | -1.621656               | 0.597754  | -0.412408 |
| 5             | 6             | 0           | -2.905694               | -0.082444 | 0.083563  |
| 6             | 6             | 0           | 0.228293                | -1.065133 | 0.262297  |
| 7             | 6             | 0           | -1.108936               | 1.666569  | 0.549633  |
| 8             | 8             | 0           | -3.793898               | 0.465112  | 0.728257  |
| 9             | 6             | 0           | -4.007079               | -2.286875 | -0.177006 |
| 10            | 1             | 0           | -3.672528               | -3.204835 | 0.318152  |
| 11            | 1             | 0           | -4.451451               | -2.548071 | -1.144565 |
| 12            | 1             | 0           | -4.755849               | -1.790848 | 0.442257  |
| 13            | 6             | 0           | -0.027549               | 2.536675  | -0.058524 |
| 14            | 6             | 0           | 1.645517                | -1.225417 | 0.115471  |
| 15            | 6             | 0           | 2.347504                | -0.488394 | -0.872656 |
| 16            | 6             | 0           | 3.724333                | -0.619134 | -0.983151 |
| 17            | 6             | 0           | 4.414960                | -1.498882 | -0.143398 |
| 18            | 6             | 0           | 3.732383                | -2.246409 | 0.826964  |
| 19            | 6             | 0           | 2.362815                | -2.106583 | 0.968172  |
| 20            | 8             | 0           | 0.239561                | 3.592154  | 0.720236  |
| 21            | 8             | 0           | 0.539129                | 2.309716  | -1.113523 |
| 22            | 6             | 0           | 1.278331                | 4.481113  | 0.254802  |
| 23            | 1             | 0           | 1.003019                | 4.911851  | -0.710353 |
| 24            | 1             | 0           | 2.223434                | 3.941860  | 0.159740  |
| 25            | 1             | 0           | 1.354729                | 5.258640  | 1.013624  |
| 26            | 1             | 0           | -1.885421               | 1.094651  | -1.354966 |
| 27            | 1             | 0           | -0.728363               | 1.238287  | 1.484516  |
| 28            | 1             | 0           | -1.940823               | -1.719119 | -2.209626 |
| 29            | 1             | 0           | -1.367192               | -2.724580 | -0.866691 |
| 30            | 1             | 0           | 1.826353                | 0.227671  | -1.495994 |
| 31            | 1             | 0           | 4.261973                | -0.036268 | -1.723034 |
| 32            | 1             | 0           | 5.490298                | -1.607406 | -0.244833 |
| 33            | 1             | 0           | 4.272656                | -2.939866 | 1.461930  |
| 34            | 1             | 0           | 1.850722                | -2.730416 | 1.695262  |
| 35            | 1             | 0           | -1.954424               | 2.297922  | 0.842326  |
| 36            | 8             | 0           | -0.387110               | -1.383294 | 1.364579  |
| 37            | 1             | 0           | 0.214242                | -1.668563 | 2.082848  |
| 38            | 1             | 0           | -0.114969               | -0.355515 | -1.701625 |

SCF Done: E(RB3LYP) = -937.933475662 A.U. after 1 cycles  
 Zero-point correction= 0.315059 (Hartree/Particle)  
 Thermal correction to Energy= 0.334416  
 Thermal correction to Enthalpy= 0.335361  
 Thermal correction to Gibbs Free Energy= 0.264686  
 Sum of electronic and zero-point Energies= -937.618416  
 Sum of electronic and thermal Energies= -937.599059  
 Sum of electronic and thermal Enthalpies= -937.598115  
 Sum of electronic and thermal Free Energies= -937.668790  
 SCF Done: E(RB3LYP) = -938.206022014 A.U. after 18 cycles

Scheme 14  
 6M1+H2O diEPhCCwTS1pcm.for3.log  
 Standard orientation:

| Center Number | Atomic Number | Atomic Type | Coordinates (Angstroms) |   |   |
|---------------|---------------|-------------|-------------------------|---|---|
|               |               |             | X                       | Y | Z |

|    |   |   |           |           |           |
|----|---|---|-----------|-----------|-----------|
| 1  | 6 | 0 | 3.692555  | -0.117385 | 0.638602  |
| 2  | 6 | 0 | 2.470117  | 0.525500  | 0.033900  |
| 3  | 6 | 0 | 1.324470  | -0.125510 | -0.218144 |
| 4  | 1 | 0 | 0.492599  | 0.458686  | -0.597312 |
| 5  | 6 | 0 | 2.527644  | 1.996154  | -0.251594 |
| 6  | 6 | 0 | 1.151186  | -1.581980 | 0.073174  |
| 7  | 8 | 0 | 1.914206  | -2.156564 | 0.858804  |
| 8  | 7 | 0 | 0.107718  | -2.217091 | -0.535391 |
| 9  | 6 | 0 | -0.728366 | -1.602702 | -1.578305 |
| 10 | 1 | 0 | -1.062762 | -2.410910 | -2.237826 |
| 11 | 1 | 0 | -0.119487 | -0.943298 | -2.203752 |
| 12 | 6 | 0 | -1.889107 | -0.864453 | -1.059052 |
| 13 | 6 | 0 | -2.830294 | -0.218155 | -0.642513 |
| 14 | 6 | 0 | -3.927658 | 0.570043  | -0.166900 |
| 15 | 8 | 0 | 1.581117  | 2.660702  | -0.627927 |
| 16 | 8 | 0 | 4.033217  | 0.058766  | 1.789513  |
| 17 | 8 | 0 | 4.373609  | -0.829752 | -0.266210 |
| 18 | 6 | 0 | 5.555100  | -1.497860 | 0.225601  |
| 19 | 1 | 0 | 5.990190  | -1.992781 | -0.641669 |
| 20 | 1 | 0 | 5.278775  | -2.230307 | 0.987681  |
| 21 | 1 | 0 | 6.254908  | -0.773174 | 0.647446  |
| 22 | 8 | 0 | 3.762809  | 2.480871  | -0.059358 |
| 23 | 6 | 0 | 3.939055  | 3.889686  | -0.320446 |
| 24 | 1 | 0 | 4.988511  | 4.092569  | -0.112578 |
| 25 | 1 | 0 | 3.294471  | 4.477276  | 0.336854  |
| 26 | 1 | 0 | 3.701448  | 4.111509  | -1.363151 |
| 27 | 6 | 0 | -0.189311 | -3.608623 | -0.196467 |
| 28 | 1 | 0 | -1.259826 | -3.719200 | 0.004082  |
| 29 | 1 | 0 | 0.380429  | -3.879307 | 0.690567  |
| 30 | 1 | 0 | 0.090628  | -4.274294 | -1.021849 |
| 31 | 6 | 0 | -3.913224 | 1.968766  | -0.335706 |
| 32 | 6 | 0 | -4.979916 | 2.739759  | 0.120682  |
| 33 | 6 | 0 | -6.069567 | 2.131243  | 0.750237  |
| 34 | 6 | 0 | -6.089635 | 0.744386  | 0.922552  |
| 35 | 6 | 0 | -5.029236 | -0.036914 | 0.468131  |
| 36 | 1 | 0 | -3.064713 | 2.438160  | -0.823822 |
| 37 | 1 | 0 | -4.960071 | 3.817374  | -0.014344 |
| 38 | 1 | 0 | -6.899154 | 2.735729  | 1.105762  |
| 39 | 1 | 0 | -6.934342 | 0.268622  | 1.412579  |
| 40 | 1 | 0 | -5.039361 | -1.114286 | 0.603678  |
| 41 | 8 | 0 | -3.730109 | -3.312785 | 0.377412  |
| 42 | 1 | 0 | -3.306941 | -2.511962 | 0.021188  |
| 43 | 1 | 0 | -4.140983 | -3.712389 | -0.406183 |

```

-----
SCF Done: E(RB3LYP) = -1165.29495720 A.U. after 1 cycles
Zero-point correction= 0.338215 (Hartree/Particle)
Thermal correction to Energy= 0.365377
Thermal correction to Enthalpy= 0.366322
Thermal correction to Gibbs Free Energy= 0.275589
Sum of electronic and zero-point Energies= -1164.956742
Sum of electronic and thermal Energies= -1164.929580
Sum of electronic and thermal Enthalpies= -1164.928636
Sum of electronic and thermal Free Energies= -1165.019368
SCF Done: E(RB3LYP) = -1165.66294833 A.U. after 15 cycles

```

TS4 diEPhCCwTS1pcm.log  
Standard orientation:

| Center<br>Number | Atomic<br>Number | Atomic<br>Type | Coordinates (Angstroms) |           |           |
|------------------|------------------|----------------|-------------------------|-----------|-----------|
|                  |                  |                | X                       | Y         | Z         |
| 1                | 6                | 0              | -2.109081               | 1.562231  | 0.671522  |
| 2                | 6                | 0              | -1.134523               | 1.260636  | -0.374839 |
| 3                | 6                | 0              | -0.990588               | -0.039403 | -0.932115 |
| 4                | 1                | 0              | -0.379548               | -0.019301 | -1.832290 |
| 5                | 6                | 0              | -0.144896               | 2.231619  | -0.844738 |
| 6                | 6                | 0              | -2.219421               | -0.936274 | -1.124706 |
| 7                | 8                | 0              | -3.118570               | -0.609690 | -1.895343 |
| 8                | 7                | 0              | -2.149540               | -2.097013 | -0.437354 |
| 9                | 6                | 0              | -1.042620               | -2.241528 | 0.490454  |
| 10               | 1                | 0              | -0.608537               | -3.245562 | 0.422943  |
| 11               | 1                | 0              | -1.373406               | -2.062968 | 1.523192  |
| 12               | 6                | 0              | -0.012695               | -1.225588 | 0.094508  |
| 13               | 6                | 0              | 1.219645                | -1.033638 | 0.198388  |

|    |   |   |           |           |           |
|----|---|---|-----------|-----------|-----------|
| 14 | 6 | 0 | 2.561467  | -0.646139 | 0.281622  |
| 15 | 8 | 0 | 0.745789  | 1.949080  | -1.647419 |
| 16 | 8 | 0 | -2.466517 | 2.662099  | 1.069825  |
| 17 | 8 | 0 | -2.632671 | 0.413415  | 1.202157  |
| 18 | 6 | 0 | -3.664313 | 0.594072  | 2.183133  |
| 19 | 1 | 0 | -3.974056 | -0.410942 | 2.470844  |
| 20 | 1 | 0 | -4.509193 | 1.145534  | 1.761810  |
| 21 | 1 | 0 | -3.281303 | 1.135816  | 3.052099  |
| 22 | 8 | 0 | -0.255222 | 3.473120  | -0.319547 |
| 23 | 6 | 0 | 0.732747  | 4.417684  | -0.759228 |
| 24 | 1 | 0 | 0.485643  | 5.351781  | -0.253716 |
| 25 | 1 | 0 | 0.690355  | 4.550412  | -1.843638 |
| 26 | 1 | 0 | 1.737596  | 4.089357  | -0.479192 |
| 27 | 6 | 0 | -3.231766 | -3.063224 | -0.430436 |
| 28 | 1 | 0 | -2.847371 | -4.066414 | -0.642864 |
| 29 | 1 | 0 | -3.947081 | -2.774614 | -1.201353 |
| 30 | 1 | 0 | -3.735244 | -3.077510 | 0.544417  |
| 31 | 6 | 0 | 2.989164  | 0.215866  | 1.324892  |
| 32 | 6 | 0 | 4.324313  | 0.585847  | 1.414461  |
| 33 | 6 | 0 | 5.249266  | 0.109912  | 0.476760  |
| 34 | 6 | 0 | 4.840416  | -0.743296 | -0.556506 |
| 35 | 6 | 0 | 3.510220  | -1.125817 | -0.658086 |
| 36 | 1 | 0 | 2.261883  | 0.576635  | 2.044648  |
| 37 | 1 | 0 | 4.650011  | 1.245781  | 2.212526  |
| 38 | 1 | 0 | 6.292198  | 0.403154  | 0.552137  |
| 39 | 1 | 0 | 5.564550  | -1.107987 | -1.278346 |
| 40 | 1 | 0 | 3.181244  | -1.787591 | -1.452671 |
| 41 | 8 | 0 | 1.048459  | -4.868702 | 0.130052  |
| 42 | 1 | 0 | 1.487251  | -4.316283 | -0.536269 |
| 43 | 1 | 0 | 1.517632  | -4.642535 | 0.948889  |

-----  
SCF Done: E(RB3LYP) = -1165.26667678 A.U. after 1 cycles  
Zero-point correction= 0.335747 (Hartree/Particle)  
Thermal correction to Energy= 0.362685  
Thermal correction to Enthalpy= 0.363630  
Thermal correction to Gibbs Free Energy= 0.274234  
Sum of electronic and zero-point Energies= -1164.930929  
Sum of electronic and thermal Energies= -1164.903991  
Sum of electronic and thermal Enthalpies= -1164.903047  
Sum of electronic and thermal Free Energies= -1164.992442  
SCF Done: E(RB3LYP) = -1165.63589612 A.U. after 16 cycles

BM2+H2O diEPHCwTS2pcm.for.log

Standard orientation:

| Center<br>Number | Atomic<br>Number | Atomic<br>Type | Coordinates (Angstroms) |           |           |
|------------------|------------------|----------------|-------------------------|-----------|-----------|
|                  |                  |                | X                       | Y         | Z         |
| 1                | 6                | 0              | -2.203881               | 1.378175  | 0.746428  |
| 2                | 6                | 0              | -1.263262               | 1.203224  | -0.342892 |
| 3                | 6                | 0              | -0.962244               | -0.103286 | -0.913282 |
| 4                | 1                | 0              | -0.437661               | 0.036549  | -1.858995 |
| 5                | 6                | 0              | -0.410116               | 2.268060  | -0.836729 |
| 6                | 6                | 0              | -2.134988               | -1.080594 | -1.131826 |
| 7                | 8                | 0              | -3.080620               | -0.827424 | -1.870703 |
| 8                | 7                | 0              | -1.931200               | -2.242208 | -0.466167 |
| 9                | 6                | 0              | -0.787109               | -2.259904 | 0.424912  |
| 10               | 1                | 0              | -0.219449               | -3.191433 | 0.325923  |
| 11               | 1                | 0              | -1.098332               | -2.133288 | 1.471056  |
| 12               | 6                | 0              | 0.051406                | -1.075886 | -0.018347 |
| 13               | 6                | 0              | 1.286837                | -0.822974 | 0.103836  |
| 14               | 6                | 0              | 2.607270                | -0.422873 | 0.237440  |
| 15               | 8                | 0              | 0.523603                | 2.073736  | -1.624031 |
| 16               | 8                | 0              | -2.619619               | 2.424313  | 1.233368  |
| 17               | 8                | 0              | -2.630002               | 0.163166  | 1.234294  |
| 18               | 6                | 0              | -3.613971               | 0.223001  | 2.273825  |
| 19               | 1                | 0              | -3.849309               | -0.814071 | 2.516392  |
| 20               | 1                | 0              | -4.512851               | 0.744160  | 1.932359  |
| 21               | 1                | 0              | -3.219933               | 0.736272  | 3.155561  |
| 22               | 8                | 0              | -0.684018               | 3.513303  | -0.369817 |
| 23               | 6                | 0              | 0.188751                | 4.549867  | -0.838641 |
| 24               | 1                | 0              | -0.174531               | 5.467647  | -0.374135 |
| 25               | 1                | 0              | 0.147124                | 4.636511  | -1.928137 |
| 26               | 1                | 0              | 1.222971                | 4.358810  | -0.537828 |



|    |   |   |           |           |           |
|----|---|---|-----------|-----------|-----------|
| 27 | 6 | 0 | -2.905642 | -3.315055 | -0.437760 |
| 28 | 1 | 0 | -2.427052 | -4.272257 | -0.670226 |
| 29 | 1 | 0 | -3.668067 | -3.095966 | -1.186640 |
| 30 | 1 | 0 | -3.378406 | -3.387750 | 0.549879  |
| 31 | 6 | 0 | 2.996907  | 0.396752  | 1.335267  |
| 32 | 6 | 0 | 4.321755  | 0.779005  | 1.474540  |
| 33 | 6 | 0 | 5.274387  | 0.362213  | 0.534298  |
| 34 | 6 | 0 | 4.906646  | -0.444965 | -0.552171 |
| 35 | 6 | 0 | 3.588526  | -0.842832 | -0.705418 |
| 36 | 1 | 0 | 2.245646  | 0.710329  | 2.052128  |
| 37 | 1 | 0 | 4.621113  | 1.402850  | 2.310642  |
| 38 | 1 | 0 | 6.310369  | 0.666684  | 0.649369  |
| 39 | 1 | 0 | 5.655516  | -0.760334 | -1.271545 |
| 40 | 1 | 0 | 3.286752  | -1.469498 | -1.538024 |
| 41 | 8 | 0 | 1.439144  | -4.819392 | 0.037827  |
| 42 | 1 | 0 | 1.975555  | -4.225092 | -0.510652 |
| 43 | 1 | 0 | 1.803404  | -4.687862 | 0.927654  |

```

-----
SCF Done: E(RB3LYP) = -1165.26746346 A.U. after 1 cycles
Zero-point correction= 0.336715 (Hartree/Particle)
Thermal correction to Energy= 0.363828
Thermal correction to Enthalpy= 0.364773
Thermal correction to Gibbs Free Energy= 0.275059
Sum of electronic and zero-point Energies= -1164.930748
Sum of electronic and thermal Energies= -1164.903635
Sum of electronic and thermal Enthalpies= -1164.902691
Sum of electronic and thermal Free Energies= -1164.992405
SCF Done: E(RB3LYP) = -1165.63707191 A.U. after 16 cycles

```

TS5 diEPhCCwTS2pcm.log  
Standard orientation:

| Center<br>Number | Atomic<br>Number | Atomic<br>Type | Coordinates (Angstroms) |           |           |
|------------------|------------------|----------------|-------------------------|-----------|-----------|
|                  |                  |                | X                       | Y         | Z         |
| 1                | 6                | 0              | -0.957652               | 1.561085  | 1.133495  |
| 2                | 6                | 0              | -0.453505               | 1.263031  | -0.174440 |
| 3                | 6                | 0              | -0.955913               | 0.077612  | -0.927402 |
| 4                | 1                | 0              | -0.482698               | 0.111807  | -1.914278 |
| 5                | 6                | 0              | 0.555395                | 2.028028  | -0.854619 |
| 6                | 6                | 0              | -2.482934               | 0.026682  | -1.159561 |
| 7                | 8                | 0              | -3.134373               | 0.939199  | -1.656411 |
| 8                | 7                | 0              | -2.973239               | -1.185374 | -0.790288 |
| 9                | 6                | 0              | -2.019548               | -2.066902 | -0.148250 |
| 10               | 1                | 0              | -2.004301               | -3.052942 | -0.624798 |
| 11               | 1                | 0              | -2.251754               | -2.206236 | 0.915741  |
| 12               | 6                | 0              | -0.698848               | -1.352348 | -0.316365 |
| 13               | 6                | 0              | 0.503934                | -1.766526 | -0.087799 |
| 14               | 6                | 0              | 1.884215                | -1.506280 | 0.057144  |
| 15               | 8                | 0              | 1.011824                | 1.758361  | -1.976928 |
| 16               | 8                | 0              | -0.686342               | 2.489022  | 1.896903  |
| 17               | 8                | 0              | -1.886252               | 0.599514  | 1.530943  |
| 18               | 6                | 0              | -2.475166               | 0.807160  | 2.814660  |
| 19               | 1                | 0              | -3.177761               | -0.016425 | 2.956336  |
| 20               | 1                | 0              | -3.007192               | 1.762674  | 2.859047  |
| 21               | 1                | 0              | -1.719431               | 0.791928  | 3.606449  |
| 22               | 8                | 0              | 1.011665                | 3.131511  | -0.181214 |
| 23               | 6                | 0              | 2.009222                | 3.893288  | -0.865262 |
| 24               | 1                | 0              | 2.261112                | 4.715833  | -0.192765 |
| 25               | 1                | 0              | 1.630262                | 4.289907  | -1.812514 |
| 26               | 1                | 0              | 2.901039                | 3.292856  | -1.070328 |
| 27               | 6                | 0              | -4.379432               | -1.527016 | -0.852762 |
| 28               | 1                | 0              | -4.526994               | -2.459174 | -1.409993 |
| 29               | 1                | 0              | -4.898208               | -0.712936 | -1.361075 |
| 30               | 1                | 0              | -4.797231               | -1.650492 | 0.154407  |
| 31               | 6                | 0              | 2.325186                | -0.731070 | 1.157728  |
| 32               | 6                | 0              | 3.673188                | -0.411635 | 1.280430  |
| 33               | 6                | 0              | 4.587678                | -0.871030 | 0.327344  |
| 34               | 6                | 0              | 4.163234                | -1.647556 | -0.760347 |
| 35               | 6                | 0              | 2.820512                | -1.966661 | -0.900699 |
| 36               | 1                | 0              | 1.601312                | -0.388284 | 1.888576  |
| 37               | 1                | 0              | 4.013712                | 0.190187  | 2.116958  |
| 38               | 1                | 0              | 5.640159                | -0.623527 | 0.430350  |
| 39               | 1                | 0              | 4.883656                | -1.994379 | -1.494194 |
| 40               | 1                | 0              | 2.475018                | -2.560289 | -1.740896 |

|    |   |   |          |           |          |
|----|---|---|----------|-----------|----------|
| 41 | 8 | 0 | 0.216520 | -3.672365 | 0.687458 |
| 42 | 1 | 0 | 0.592891 | -4.281684 | 0.026555 |
| 43 | 1 | 0 | 0.817363 | -3.732301 | 1.452678 |

```

-----
SCF Done: E(RB3LYP) = -1165.26320681 A.U. after 1 cycles
Zero-point correction= 0.338770 (Hartree/Particle)
Thermal correction to Energy= 0.363631
Thermal correction to Enthalpy= 0.364575
Thermal correction to Gibbs Free Energy= 0.282440
Sum of electronic and zero-point Energies= -1164.924436
Sum of electronic and thermal Energies= -1164.899576
Sum of electronic and thermal Enthalpies= -1164.898632
Sum of electronic and thermal Free Energies= -1164.980767
SCF Done: E(RB3LYP) = -1165.62928936 A.U. after 18 cycles

```

CM2 diEPhCCwTS2pcm.rev.log  
Standard orientation:

| Center Number | Atomic Number | Atomic Type | Coordinates (Angstroms) |           |           |
|---------------|---------------|-------------|-------------------------|-----------|-----------|
|               |               |             | X                       | Y         | Z         |
| 1             | 6             | 0           | -0.720195               | 1.506509  | 1.202785  |
| 2             | 6             | 0           | -0.281647               | 1.202618  | -0.119163 |
| 3             | 6             | 0           | -0.923118               | 0.069052  | -0.885468 |
| 4             | 1             | 0           | -0.412566               | 0.047594  | -1.857118 |
| 5             | 6             | 0           | 0.741312                | 1.907662  | -0.825757 |
| 6             | 6             | 0           | -2.424174               | 0.247438  | -1.181968 |
| 7             | 8             | 0           | -2.940965               | 1.247053  | -1.673306 |
| 8             | 7             | 0           | -3.085551               | -0.898518 | -0.854705 |
| 9             | 6             | 0           | -2.270351               | -1.903359 | -0.199233 |
| 10            | 1             | 0           | -2.346534               | -2.871370 | -0.710734 |
| 11            | 1             | 0           | -2.583616               | -2.050898 | 0.843777  |
| 12            | 6             | 0           | -0.871366               | -1.326778 | -0.274559 |
| 13            | 6             | 0           | 0.237232                | -1.949305 | 0.093063  |
| 14            | 6             | 0           | 1.670827                | -1.636900 | 0.106070  |
| 15            | 8             | 0           | 1.126197                | 1.647439  | -1.979751 |
| 16            | 8             | 0           | -0.339588               | 2.371360  | 1.997198  |
| 17            | 8             | 0           | -1.746690               | 0.634984  | 1.593114  |
| 18            | 6             | 0           | -2.268816               | 0.852327  | 2.901670  |
| 19            | 1             | 0           | -3.053939               | 0.105402  | 3.038490  |
| 20            | 1             | 0           | -2.691782               | 1.857212  | 3.002545  |
| 21            | 1             | 0           | -1.497280               | 0.723408  | 3.668116  |
| 22            | 8             | 0           | 1.320683                | 2.951435  | -0.140306 |
| 23            | 6             | 0           | 2.339646                | 3.654091  | -0.851486 |
| 24            | 1             | 0           | 2.682279                | 4.439191  | -0.173606 |
| 25            | 1             | 0           | 1.952901                | 4.102622  | -1.772394 |
| 26            | 1             | 0           | 3.176515                | 2.997282  | -1.110638 |
| 27            | 6             | 0           | -4.519220               | -1.058746 | -0.971530 |
| 28            | 1             | 0           | -4.764101               | -1.956747 | -1.550805 |
| 29            | 1             | 0           | -4.913407               | -0.178704 | -1.481936 |
| 30            | 1             | 0           | -4.987445               | -1.143134 | 0.017796  |
| 31            | 6             | 0           | 2.242820                | -0.966705 | 1.201943  |
| 32            | 6             | 0           | 3.610018                | -0.696314 | 1.217979  |
| 33            | 6             | 0           | 4.415004                | -1.093808 | 0.146473  |
| 34            | 6             | 0           | 3.854091                | -1.760429 | -0.945841 |
| 35            | 6             | 0           | 2.486713                | -2.032495 | -0.968510 |
| 36            | 1             | 0           | 1.611176                | -0.650795 | 2.025966  |
| 37            | 1             | 0           | 4.046611                | -0.173229 | 2.063493  |
| 38            | 1             | 0           | 5.479984                | -0.880192 | 0.161428  |
| 39            | 1             | 0           | 4.478822                | -2.063623 | -1.780624 |
| 40            | 1             | 0           | 2.044911                | -2.542174 | -1.819844 |
| 41            | 8             | 0           | -0.064159               | -3.360114 | 0.672278  |
| 42            | 1             | 0           | 0.404862                | -4.066112 | 0.173888  |
| 43            | 1             | 0           | 0.214992                | -3.432490 | 1.612527  |

```

-----
SCF Done: E(RB3LYP) = -1165.26985428 A.U. after 1 cycles
Zero-point correction= 0.341559 (Hartree/Particle)
Thermal correction to Energy= 0.366096
Thermal correction to Enthalpy= 0.367040
Thermal correction to Gibbs Free Energy= 0.285713
Sum of electronic and zero-point Energies= -1164.928295
Sum of electronic and thermal Energies= -1164.903758
Sum of electronic and thermal Enthalpies= -1164.902814
Sum of electronic and thermal Free Energies= -1164.984141

```

SCF Done: E(RB3LYP) = -1165.63493466 A.U. after 16 cycles

7Mc diEPhCCwplpcm.log  
Standard orientation:

| Center Number | Atomic Number | Atomic Type | Coordinates (Angstroms) |           |           |
|---------------|---------------|-------------|-------------------------|-----------|-----------|
|               |               |             | X                       | Y         | Z         |
| 1             | 6             | 0           | -0.923013               | 0.549906  | 1.451005  |
| 2             | 6             | 0           | -0.527279               | 0.916868  | 0.022049  |
| 3             | 6             | 0           | -0.426859               | -0.226985 | -1.024300 |
| 4             | 1             | 0           | -0.134913               | 0.276029  | -1.950405 |
| 5             | 6             | 0           | -1.418089               | 2.030961  | -0.552176 |
| 6             | 6             | 0           | -1.778088               | -0.912334 | -1.280381 |
| 7             | 8             | 0           | -2.794002               | -0.332286 | -1.661660 |
| 8             | 7             | 0           | -1.649832               | -2.238316 | -1.036274 |
| 9             | 6             | 0           | -0.380920               | -2.612906 | -0.425761 |
| 10            | 1             | 0           | -0.002189               | -3.540382 | -0.867663 |
| 11            | 1             | 0           | -0.496015               | -2.764112 | 0.652858  |
| 12            | 6             | 0           | 0.546048                | -1.417421 | -0.733556 |
| 13            | 6             | 0           | 1.585738                | -1.162544 | 0.359529  |
| 14            | 6             | 0           | 2.822738                | -0.393768 | 0.025441  |
| 15            | 8             | 0           | -1.184146               | 2.578227  | -1.609013 |
| 16            | 8             | 0           | -0.465538               | 1.108296  | 2.426846  |
| 17            | 8             | 0           | -1.836612               | -0.428158 | 1.503151  |
| 18            | 6             | 0           | -2.270713               | -0.817103 | 2.823981  |
| 19            | 1             | 0           | -3.003354               | -1.607356 | 2.666987  |
| 20            | 1             | 0           | -2.724345               | 0.033829  | 3.336636  |
| 21            | 1             | 0           | -1.421728               | -1.187146 | 3.402711  |
| 22            | 8             | 0           | -2.435351               | 2.344965  | 0.257296  |
| 23            | 6             | 0           | -3.317827               | 3.388963  | -0.209971 |
| 24            | 1             | 0           | -4.060609               | 3.512729  | 0.576702  |
| 25            | 1             | 0           | -3.792726               | 3.083907  | -1.144847 |
| 26            | 1             | 0           | -2.759575               | 4.314713  | -0.363655 |
| 27            | 6             | 0           | -2.767099               | -3.160393 | -1.081735 |
| 28            | 1             | 0           | -2.502294               | -4.052229 | -1.659730 |
| 29            | 1             | 0           | -3.608208               | -2.653762 | -1.557327 |
| 30            | 1             | 0           | -3.057729               | -3.471605 | -0.070103 |
| 31            | 6             | 0           | 3.737916                | -0.136407 | 1.062940  |
| 32            | 6             | 0           | 4.904941                | 0.578388  | 0.816494  |
| 33            | 6             | 0           | 5.175695                | 1.051041  | -0.472557 |
| 34            | 6             | 0           | 4.274575                | 0.804903  | -1.510482 |
| 35            | 6             | 0           | 3.104893                | 0.085506  | -1.265628 |
| 36            | 1             | 0           | 3.511863                | -0.507188 | 2.056932  |
| 37            | 1             | 0           | 5.604366                | 0.770101  | 1.625009  |
| 38            | 1             | 0           | 6.086897                | 1.609960  | -0.666166 |
| 39            | 1             | 0           | 4.481644                | 1.170664  | -2.511726 |
| 40            | 1             | 0           | 2.421822                | -0.094713 | -2.088744 |
| 41            | 8             | 0           | 1.392575                | -1.567516 | 1.501719  |
| 42            | 1             | 0           | 0.462850                | 1.376892  | 0.107701  |
| 43            | 1             | 0           | 1.071701                | -1.630384 | -1.667324 |

SCF Done: E(RB3LYP) = -1165.39236964 A.U. after 1 cycles  
Zero-point correction= 0.345586 (Hartree/Particle)  
Thermal correction to Energy= 0.369193  
Thermal correction to Enthalpy= 0.370138  
Thermal correction to Gibbs Free Energy= 0.289939  
Sum of electronic and zero-point Energies= -1165.046784  
Sum of electronic and thermal Energies= -1165.023176  
Sum of electronic and thermal Enthalpies= -1165.022232  
Sum of electronic and thermal Free Energies= -1165.102430  
SCF Done: E(RB3LYP) = -1165.73904242 A.U. after 16 cycles

7Mt diEPhCCwpl2pcm.log  
Standard orientation:

| Center Number | Atomic Number | Atomic Type | Coordinates (Angstroms) |           |           |
|---------------|---------------|-------------|-------------------------|-----------|-----------|
|               |               |             | X                       | Y         | Z         |
| 1             | 6             | 0           | -1.590230               | -1.194887 | -1.214672 |
| 2             | 6             | 0           | -1.463823               | -0.968427 | 0.289717  |
| 3             | 6             | 0           | -0.684185               | 0.283223  | 0.737165  |

|    |   |   |           |           |           |
|----|---|---|-----------|-----------|-----------|
| 4  | 1 | 0 | -0.609367 | 0.210655  | 1.829021  |
| 5  | 6 | 0 | -2.824594 | -1.007871 | 1.000928  |
| 6  | 6 | 0 | -1.373060 | 1.616119  | 0.438849  |
| 7  | 8 | 0 | -2.580313 | 1.836299  | 0.512455  |
| 8  | 7 | 0 | -0.407886 | 2.524554  | 0.138598  |
| 9  | 6 | 0 | 0.947427  | 1.993885  | 0.199490  |
| 10 | 1 | 0 | 1.448543  | 2.317559  | 1.123245  |
| 11 | 1 | 0 | 1.541027  | 2.351732  | -0.647204 |
| 12 | 6 | 0 | 0.732992  | 0.451500  | 0.167591  |
| 13 | 6 | 0 | 1.806985  | -0.304328 | 0.954498  |
| 14 | 6 | 0 | 3.184625  | -0.412098 | 0.387968  |
| 15 | 8 | 0 | -2.938784 | -0.932551 | 2.206143  |
| 16 | 8 | 0 | -1.565401 | -2.295257 | -1.727723 |
| 17 | 8 | 0 | -1.727468 | -0.050950 | -1.901134 |
| 18 | 6 | 0 | -1.880390 | -0.183665 | -3.330551 |
| 19 | 1 | 0 | -1.950097 | 0.834781  | -3.710032 |
| 20 | 1 | 0 | -2.790141 | -0.742997 | -3.559998 |
| 21 | 1 | 0 | -1.016524 | -0.696787 | -3.758457 |
| 22 | 8 | 0 | -3.844064 | -1.186242 | 0.151801  |
| 23 | 6 | 0 | -5.158925 | -1.244993 | 0.745613  |
| 24 | 1 | 0 | -5.844127 | -1.411024 | -0.084506 |
| 25 | 1 | 0 | -5.383697 | -0.301633 | 1.248113  |
| 26 | 1 | 0 | -5.214405 | -2.067111 | 1.462253  |
| 27 | 6 | 0 | -0.663265 | 3.942940  | -0.017850 |
| 28 | 1 | 0 | -0.220324 | 4.514687  | 0.807269  |
| 29 | 1 | 0 | -1.743960 | 4.092720  | -0.020025 |
| 30 | 1 | 0 | -0.242116 | 4.306356  | -0.961729 |
| 31 | 6 | 0 | 4.188287  | -0.978010 | 1.194861  |
| 32 | 6 | 0 | 5.490640  | -1.100369 | 0.722495  |
| 33 | 6 | 0 | 5.810077  | -0.662003 | -0.567518 |
| 34 | 6 | 0 | 4.821812  | -0.102086 | -1.379784 |
| 35 | 6 | 0 | 3.515742  | 0.023766  | -0.906226 |
| 36 | 1 | 0 | 3.924364  | -1.313236 | 2.192271  |
| 37 | 1 | 0 | 6.258365  | -1.536027 | 1.355392  |
| 38 | 1 | 0 | 6.826832  | -0.758176 | -0.937823 |
| 39 | 1 | 0 | 5.065746  | 0.235271  | -2.382731 |
| 40 | 1 | 0 | 2.762507  | 0.454307  | -1.557222 |
| 41 | 8 | 0 | 1.537495  | -0.792185 | 2.046781  |
| 42 | 1 | 0 | -0.924366 | -1.843517 | 0.668603  |
| 43 | 1 | 0 | 0.754538  | 0.131478  | -0.878653 |

```

-----
SCF Done: E(RB3LYP) = -1165.39679424      A.U. after 1 cycles
Zero-point correction=                    0.345090 (Hartree/Particle)
Thermal correction to Energy=             0.368892
Thermal correction to Enthalpy=           0.369836
Thermal correction to Gibbs Free Energy=  0.288758
Sum of electronic and zero-point Energies= -1165.051704
Sum of electronic and thermal Energies=   -1165.027902
Sum of electronic and thermal Enthalpies= -1165.026958
Sum of electronic and thermal Free Energies= -1165.108036
SCF Done: E(RB3LYP) = -1165.74443350      A.U. after 14 cycles

```

Scheme 15  
6M2+H++H2O diEHCHwTSlpcm.for3.log  
Standard orientation:

| Center<br>Number | Atomic<br>Number | Atomic<br>Type | Coordinates (Angstroms) |           |           |
|------------------|------------------|----------------|-------------------------|-----------|-----------|
|                  |                  |                | X                       | Y         | Z         |
| 1                | 6                | 0              | -0.807035               | -1.804872 | -0.286546 |
| 2                | 6                | 0              | 0.186314                | -0.906111 | 0.290732  |
| 3                | 6                | 0              | -0.111150               | 0.324775  | 0.790712  |
| 4                | 1                | 0              | 0.700034                | 0.879082  | 1.249625  |
| 5                | 6                | 0              | 1.588798                | -1.408799 | 0.281979  |
| 6                | 6                | 0              | -1.479491               | 0.896821  | 1.048231  |
| 7                | 8                | 0              | -1.961720               | 0.555360  | 2.131118  |
| 8                | 7                | 0              | -2.029735               | 1.758946  | 0.171934  |
| 9                | 6                | 0              | -1.426538               | 2.081054  | -1.134569 |
| 10               | 1                | 0              | -1.887151               | 3.015377  | -1.470720 |
| 11               | 1                | 0              | -1.695850               | 1.313396  | -1.872771 |
| 12               | 6                | 0              | 0.026902                | 2.249715  | -1.074843 |
| 13               | 6                | 0              | 1.227453                | 2.405025  | -1.045322 |
| 14               | 1                | 0              | 2.301324                | 2.492667  | -0.965136 |
| 15               | 8                | 0              | 1.875834                | -2.546831 | -0.114501 |

|    |   |   |           |           |           |
|----|---|---|-----------|-----------|-----------|
| 16 | 8 | 0 | -0.498155 | -2.981418 | -0.693830 |
| 17 | 8 | 0 | -2.026260 | -1.400111 | -0.378011 |
| 18 | 6 | 0 | -3.043104 | -2.296645 | -0.938126 |
| 19 | 1 | 0 | -3.964360 | -1.723685 | -0.880833 |
| 20 | 1 | 0 | -3.094450 | -3.199298 | -0.330033 |
| 21 | 1 | 0 | -2.779865 | -2.529521 | -1.969570 |
| 22 | 8 | 0 | 2.469661  | -0.529203 | 0.695406  |
| 23 | 6 | 0 | 3.878295  | -0.895740 | 0.674671  |
| 24 | 1 | 0 | 4.405866  | 0.055679  | 0.653128  |
| 25 | 1 | 0 | 4.092782  | -1.487190 | -0.215302 |
| 26 | 1 | 0 | 4.106255  | -1.466332 | 1.576612  |
| 27 | 6 | 0 | -3.369757 | 2.287134  | 0.427607  |
| 28 | 1 | 0 | -3.346840 | 3.380997  | 0.411921  |
| 29 | 1 | 0 | -3.696476 | 1.942305  | 1.407428  |
| 30 | 1 | 0 | -4.068394 | 1.930281  | -0.336784 |
| 31 | 8 | 0 | 4.286007  | 2.306579  | -0.483698 |
| 32 | 1 | 0 | 4.812450  | 2.223368  | -1.294798 |
| 33 | 1 | 0 | 4.611934  | 3.126695  | -0.079397 |
| 34 | 1 | 0 | 0.523811  | -3.095581 | -0.545917 |

-----  
SCF Done: E(RB3LYP) = -934.641891758 A.U. after 1 cycles  
Zero-point correction= 0.266762 (Hartree/Particle)  
Thermal correction to Energy= 0.289544  
Thermal correction to Enthalpy= 0.290488  
Thermal correction to Gibbs Free Energy= 0.213240  
Sum of electronic and zero-point Energies= -934.375129  
Sum of electronic and thermal Energies= -934.352348  
Sum of electronic and thermal Enthalpies= -934.351403  
Sum of electronic and thermal Free Energies= -934.428652  
SCF Done: E(RB3LYP) = -934.948717142 A.U. after 16 cycles

TS6 diEHCHwTS1pcm.log

Standard orientation:

| Center<br>Number | Atomic<br>Number | Atomic<br>Type | Coordinates (Angstroms) |           |           |
|------------------|------------------|----------------|-------------------------|-----------|-----------|
|                  |                  |                | X                       | Y         | Z         |
| 1                | 6                | 0              | 0.569519                | -1.643398 | -0.686445 |
| 2                | 6                | 0              | 0.914516                | -0.566295 | 0.181143  |
| 3                | 6                | 0              | -0.038660               | 0.191785  | 0.895101  |
| 4                | 1                | 0              | 0.383402                | 0.834638  | 1.659558  |
| 5                | 6                | 0              | 2.338084                | -0.221114 | 0.240594  |
| 6                | 6                | 0              | -1.375402               | -0.412745 | 1.330818  |
| 7                | 8                | 0              | -1.344495               | -1.261243 | 2.215917  |
| 8                | 7                | 0              | -2.469605               | 0.079564  | 0.721594  |
| 9                | 6                | 0              | -2.292102               | 1.055276  | -0.343934 |
| 10               | 1                | 0              | -3.037407               | 1.851814  | -0.245405 |
| 11               | 1                | 0              | -2.421811               | 0.588552  | -1.329979 |
| 12               | 6                | 0              | -0.934787               | 1.634357  | -0.222987 |
| 13               | 6                | 0              | -0.093608               | 2.521913  | -0.378842 |
| 14               | 1                | 0              | 0.797791                | 3.110916  | -0.391564 |
| 15               | 8                | 0              | 3.225028                | -0.884899 | -0.320780 |
| 16               | 8                | 0              | 1.458375                | -2.362136 | -1.297091 |
| 17               | 8                | 0              | -0.687009               | -1.925066 | -0.881148 |
| 18               | 6                | 0              | -1.036550               | -3.047494 | -1.745032 |
| 19               | 1                | 0              | -2.122943               | -3.079865 | -1.721142 |
| 20               | 1                | 0              | -0.605912               | -3.964722 | -1.342858 |
| 21               | 1                | 0              | -0.669937               | -2.856752 | -2.753940 |
| 22               | 8                | 0              | 2.599233                | 0.878430  | 0.936710  |
| 23               | 6                | 0              | 3.990517                | 1.270214  | 1.045769  |
| 24               | 1                | 0              | 3.980235                | 2.181277  | 1.640823  |
| 25               | 1                | 0              | 4.402976                | 1.457385  | 0.053074  |
| 26               | 1                | 0              | 4.558927                | 0.484684  | 1.546490  |
| 27               | 6                | 0              | -3.800975               | -0.439562 | 0.997552  |
| 28               | 1                | 0              | -4.469416               | 0.374528  | 1.294911  |
| 29               | 1                | 0              | -3.720268               | -1.162147 | 1.809536  |
| 30               | 1                | 0              | -4.208993               | -0.932455 | 0.108271  |
| 31               | 8                | 0              | -0.824834               | 4.511236  | -1.719946 |
| 32               | 1                | 0              | -1.203306               | 4.050800  | -2.486645 |
| 33               | 1                | 0              | -1.604032               | 4.766918  | -1.199635 |
| 34               | 1                | 0              | 2.374224                | -1.970699 | -1.044362 |

-----  
SCF Done: E(RB3LYP) = -934.626685424 A.U. after 1 cycles  
Zero-point correction= 0.266771 (Hartree/Particle)

Thermal correction to Energy= 0.288568  
 Thermal correction to Enthalpy= 0.289512  
 Thermal correction to Gibbs Free Energy= 0.214618  
 Sum of electronic and zero-point Energies= -934.359915  
 Sum of electronic and thermal Energies= -934.338117  
 Sum of electronic and thermal Enthalpies= -934.337173  
 Sum of electronic and thermal Free Energies= -934.412067  
 SCF Done: E(RB3LYP) = -934.931661475 A.U. after 16 cycles

CM3+H+ diEHCCHWTS1pcm.rev.log  
 Standard orientation:

| Center Number | Atomic Number | Atomic Type | Coordinates (Angstroms) |           |           |
|---------------|---------------|-------------|-------------------------|-----------|-----------|
|               |               |             | X                       | Y         | Z         |
| 1             | 6             | 0           | 0.801687                | -1.503378 | -0.320785 |
| 2             | 6             | 0           | 0.988318                | -0.187351 | 0.078366  |
| 3             | 6             | 0           | -0.189164               | 0.698181  | 0.385774  |
| 4             | 1             | 0           | 0.204871                | 1.646406  | 0.772922  |
| 5             | 6             | 0           | 2.349335                | 0.265274  | 0.203935  |
| 6             | 6             | 0           | -1.144362               | 0.177404  | 1.484430  |
| 7             | 8             | 0           | -0.798095               | -0.337421 | 2.539350  |
| 8             | 7             | 0           | -2.422361               | 0.441356  | 1.099252  |
| 9             | 6             | 0           | -2.559832               | 1.029349  | -0.222900 |
| 10            | 1             | 0           | -2.969552               | 2.048764  | -0.168014 |
| 11            | 1             | 0           | -3.241096               | 0.433935  | -0.845344 |
| 12            | 6             | 0           | -1.141932               | 1.030831  | -0.753229 |
| 13            | 6             | 0           | -0.723452               | 1.265899  | -1.983955 |
| 14            | 1             | 0           | 0.275263                | 1.254518  | -2.389351 |
| 15            | 8             | 0           | 3.350505                | -0.448664 | -0.021782 |
| 16            | 8             | 0           | 1.780575                | -2.341611 | -0.586736 |
| 17            | 8             | 0           | -0.433015               | -1.965103 | -0.456084 |
| 18            | 6             | 0           | -0.618318               | -3.341394 | -0.861731 |
| 19            | 1             | 0           | -1.697705               | -3.480479 | -0.890199 |
| 20            | 1             | 0           | -0.164022               | -4.016150 | -0.133890 |
| 21            | 1             | 0           | -0.184120               | -3.506602 | -1.849625 |
| 22            | 8             | 0           | 2.482794                | 1.546670  | 0.585668  |
| 23            | 6             | 0           | 3.828808                | 2.042795  | 0.721135  |
| 24            | 1             | 0           | 3.720902                | 3.082805  | 1.027232  |
| 25            | 1             | 0           | 4.357832                | 1.977171  | -0.232259 |
| 26            | 1             | 0           | 4.370984                | 1.474842  | 1.480463  |
| 27            | 6             | 0           | -3.583734               | 0.163631  | 1.921861  |
| 28            | 1             | 0           | -4.130485               | 1.086850  | 2.145256  |
| 29            | 1             | 0           | -3.233696               | -0.285727 | 2.852054  |
| 30            | 1             | 0           | -4.259775               | -0.532699 | 1.412411  |
| 31            | 8             | 0           | -1.673900               | 1.584861  | -3.070042 |
| 32            | 1             | 0           | -2.355676               | 0.903337  | -3.262400 |
| 33            | 1             | 0           | -2.086608               | 2.476056  | -3.026867 |
| 34            | 1             | 0           | 2.634366                | -1.809815 | -0.427543 |

SCF Done: E(RB3LYP) = -934.677974779 A.U. after 1 cycles  
 Zero-point correction= 0.275289 (Hartree/Particle)  
 Thermal correction to Energy= 0.294482  
 Thermal correction to Enthalpy= 0.295426  
 Thermal correction to Gibbs Free Energy= 0.227546  
 Sum of electronic and zero-point Energies= -934.402686  
 Sum of electronic and thermal Energies= -934.383493  
 Sum of electronic and thermal Enthalpies= -934.382549  
 Sum of electronic and thermal Free Energies= -934.450429  
 SCF Done: E(RB3LYP) = -934.976229730 A.U. after 16 cycles

3M2+H++H2O HCCHWTS2pcm.for4.log  
 Standard orientation:

| Center Number | Atomic Number | Atomic Type | Coordinates (Angstroms) |           |           |
|---------------|---------------|-------------|-------------------------|-----------|-----------|
|               |               |             | X                       | Y         | Z         |
| 1             | 6             | 0           | -2.813537               | -0.595489 | 0.000714  |
| 2             | 6             | 0           | -1.953602               | 0.536795  | 0.254428  |
| 3             | 6             | 0           | -0.629000               | 0.493370  | 0.027748  |
| 4             | 1             | 0           | -0.161458               | -0.416029 | -0.335105 |
| 5             | 1             | 0           | -2.435311               | 1.430577  | 0.632715  |
| 6             | 6             | 0           | 0.209141                | 1.699332  | 0.357136  |

|    |   |   |           |           |           |
|----|---|---|-----------|-----------|-----------|
| 7  | 8 | 0 | -0.217772 | 2.527719  | 1.165655  |
| 8  | 7 | 0 | 1.425432  | 1.787306  | -0.243985 |
| 9  | 6 | 0 | 1.887432  | 0.884122  | -1.311533 |
| 10 | 1 | 0 | 2.501041  | 1.483549  | -1.993389 |
| 11 | 1 | 0 | 1.034067  | 0.548781  | -1.907652 |
| 12 | 6 | 0 | 2.657869  | -0.261678 | -0.813082 |
| 13 | 6 | 0 | 3.282712  | -1.209561 | -0.396231 |
| 14 | 1 | 0 | 3.845619  | -2.054867 | -0.029573 |
| 15 | 8 | 0 | -2.287177 | -1.711274 | -0.399790 |
| 16 | 8 | 0 | -4.072006 | -0.415002 | 0.191771  |
| 17 | 6 | 0 | -5.066130 | -1.462972 | -0.051876 |
| 18 | 1 | 0 | -6.015019 | -0.989789 | 0.184606  |
| 19 | 1 | 0 | -4.881962 | -2.302009 | 0.620985  |
| 20 | 1 | 0 | -5.036660 | -1.753068 | -1.103673 |
| 21 | 6 | 0 | 2.346453  | 2.852755  | 0.146830  |
| 22 | 1 | 0 | 3.331620  | 2.421897  | 0.351387  |
| 23 | 1 | 0 | 1.963603  | 3.337703  | 1.042660  |
| 24 | 1 | 0 | 2.441423  | 3.592689  | -0.656034 |
| 25 | 8 | 0 | 4.934204  | -3.631432 | 0.730724  |
| 26 | 1 | 0 | 5.622495  | -3.168758 | 1.235240  |
| 27 | 1 | 0 | 4.345129  | -3.978090 | 1.419977  |
| 28 | 1 | 0 | -2.918632 | -2.443857 | -0.545957 |

-----  
SCF Done: E(RB3LYP) = -706.755844921 A.U. after 1 cycles  
Zero-point correction= 0.224796 (Hartree/Particle)  
Thermal correction to Energy= 0.243554  
Thermal correction to Enthalpy= 0.244498  
Thermal correction to Gibbs Free Energy= 0.174680  
Sum of electronic and zero-point Energies= -706.531049  
Sum of electronic and thermal Energies= -706.512291  
Sum of electronic and thermal Enthalpies= -706.511346  
Sum of electronic and thermal Free Energies= -706.581165  
SCF Done: E(RB3LYP) = -706.996237116 A.U. after 16 cycles

TS7 HCCHwTS2pcm.log  
Standard orientation:

| Center<br>Number | Atomic<br>Number | Atomic<br>Type | Coordinates (Angstroms) |           |           |
|------------------|------------------|----------------|-------------------------|-----------|-----------|
|                  |                  |                | X                       | Y         | Z         |
| 1                | 6                | 0              | 2.270099                | -0.327030 | -0.001697 |
| 2                | 6                | 0              | 0.997735                | -0.791213 | -0.292579 |
| 3                | 6                | 0              | -0.086546               | -0.557786 | 0.583055  |
| 4                | 1                | 0              | 0.158303                | -0.335372 | 1.616952  |
| 5                | 1                | 0              | 0.855648                | -1.282061 | -1.247493 |
| 6                | 6                | 0              | -1.284497               | -1.499666 | 0.435560  |
| 7                | 8                | 0              | -1.219330               | -2.634558 | 0.895858  |
| 8                | 7                | 0              | -2.317669               | -0.968901 | -0.252523 |
| 9                | 6                | 0              | -2.216252               | 0.425126  | -0.657996 |
| 10               | 1                | 0              | -3.142015               | 0.956804  | -0.412845 |
| 11               | 1                | 0              | -2.050124               | 0.513500  | -1.740133 |
| 12               | 6                | 0              | -1.082141               | 1.025389  | 0.094406  |
| 13               | 6                | 0              | -0.561362               | 2.052714  | 0.557287  |
| 14               | 1                | 0              | 0.122186                | 2.712971  | 1.047040  |
| 15               | 8                | 0              | 2.459186                | 0.403208  | 1.089460  |
| 16               | 8                | 0              | 3.254114                | -0.600179 | -0.835942 |
| 17               | 6                | 0              | 4.587763                | -0.082708 | -0.618572 |
| 18               | 1                | 0              | 5.165811                | -0.438254 | -1.468817 |
| 19               | 1                | 0              | 5.013706                | -0.488006 | 0.303825  |
| 20               | 1                | 0              | 4.578675                | 1.010495  | -0.611405 |
| 21               | 6                | 0              | -3.507895               | -1.733981 | -0.587632 |
| 22               | 1                | 0              | -4.393492               | -1.287034 | -0.123198 |
| 23               | 1                | 0              | -3.372407               | -2.748802 | -0.213329 |
| 24               | 1                | 0              | -3.649076               | -1.758992 | -1.673476 |
| 25               | 8                | 0              | -1.613241               | 4.113952  | -0.058756 |
| 26               | 1                | 0              | -1.681258               | 4.011082  | -1.022643 |
| 27               | 1                | 0              | -2.522222               | 3.972810  | 0.254585  |
| 28               | 1                | 0              | 3.392691                | 0.618714  | 1.262664  |

-----  
SCF Done: E(RB3LYP) = -706.728580623 A.U. after 1 cycles  
Zero-point correction= 0.224411 (Hartree/Particle)  
Thermal correction to Energy= 0.241677  
Thermal correction to Enthalpy= 0.242621  
Thermal correction to Gibbs Free Energy= 0.178783

Sum of electronic and zero-point Energies= -706.504170  
 Sum of electronic and thermal Energies= -706.486904  
 Sum of electronic and thermal Enthalpies= -706.485960  
 Sum of electronic and thermal Free Energies= -706.549797  
 SCF Done: E(RB3LYP) = -706.965060602 A.U. after 15 cycles

CM4+H+ HCCHwTS2pcm.rev.log  
 Standard orientation:

| Center Number | Atomic Number | Atomic Type | Coordinates (Angstroms) |           |           |
|---------------|---------------|-------------|-------------------------|-----------|-----------|
|               |               |             | X                       | Y         | Z         |
| 1             | 6             | 0           | 2.264713                | -0.451407 | 0.092608  |
| 2             | 6             | 0           | 1.051892                | -0.353394 | -0.470912 |
| 3             | 6             | 0           | -0.216821               | -0.263432 | 0.320320  |
| 4             | 1             | 0           | 0.021992                | -0.377261 | 1.387074  |
| 5             | 1             | 0           | 0.992487                | -0.360473 | -1.553377 |
| 6             | 6             | 0           | -1.253303               | -1.364561 | 0.001872  |
| 7             | 8             | 0           | -1.002531               | -2.554113 | -0.144294 |
| 8             | 7             | 0           | -2.487549               | -0.791669 | -0.049002 |
| 9             | 6             | 0           | -2.505797               | 0.650167  | 0.147748  |
| 10            | 1             | 0           | -2.991817               | 0.912590  | 1.099588  |
| 11            | 1             | 0           | -3.060015               | 1.145797  | -0.659450 |
| 12            | 6             | 0           | -1.034272               | 1.008503  | 0.152559  |
| 13            | 6             | 0           | -0.464797               | 2.190448  | 0.003586  |
| 14            | 1             | 0           | 0.581420                | 2.450489  | -0.026251 |
| 15            | 8             | 0           | 2.454828                | -0.313238 | 1.436013  |
| 16            | 8             | 0           | 3.370351                | -0.704270 | -0.651641 |
| 17            | 6             | 0           | 4.468328                | 0.219057  | -0.496413 |
| 18            | 1             | 0           | 5.237146                | -0.117558 | -1.192019 |
| 19            | 1             | 0           | 4.867608                | 0.207658  | 0.521910  |
| 20            | 1             | 0           | 4.148873                | 1.234302  | -0.755474 |
| 21            | 6             | 0           | -3.715653               | -1.541366 | -0.229505 |
| 22            | 1             | 0           | -4.367787               | -1.435215 | 0.645312  |
| 23            | 1             | 0           | -3.449390               | -2.591241 | -0.358446 |
| 24            | 1             | 0           | -4.254883               | -1.190039 | -1.116480 |
| 25            | 8             | 0           | -1.262675               | 3.425281  | -0.122494 |
| 26            | 1             | 0           | -1.438553               | 3.716027  | -1.046388 |
| 27            | 1             | 0           | -2.088655               | 3.464827  | 0.406535  |
| 28            | 1             | 0           | 3.168904                | -0.911590 | 1.718630  |

SCF Done: E(RB3LYP) = -706.772286704 A.U. after 1 cycles  
 Zero-point correction= 0.230867 (Hartree/Particle)  
 Thermal correction to Energy= 0.246480  
 Thermal correction to Enthalpy= 0.247424  
 Thermal correction to Gibbs Free Energy= 0.186953  
 Sum of electronic and zero-point Energies= -706.541419  
 Sum of electronic and thermal Energies= -706.525807  
 Sum of electronic and thermal Enthalpies= -706.524863  
 Sum of electronic and thermal Free Energies= -706.585333  
 SCF Done: E(RB3LYP) = -707.002812173 A.U. after 17 cycles

Scheme 16  
 6M3 diEMeCCTS3pcm.for.log  
 Standard orientation:

| Center Number | Atomic Number | Atomic Type | Coordinates (Angstroms) |           |           |
|---------------|---------------|-------------|-------------------------|-----------|-----------|
|               |               |             | X                       | Y         | Z         |
| 1             | 6             | 0           | 2.082804                | 0.902220  | -0.098528 |
| 2             | 6             | 0           | 1.107065                | -0.246774 | -0.170647 |
| 3             | 6             | 0           | -0.224084               | -0.096946 | -0.234314 |
| 4             | 1             | 0           | -0.824889               | -0.996713 | -0.312756 |
| 5             | 6             | 0           | 1.671974                | -1.633248 | -0.231597 |
| 6             | 6             | 0           | -0.880908               | 1.242830  | -0.129022 |
| 7             | 8             | 0           | -0.262155               | 2.202733  | 0.347382  |
| 8             | 7             | 0           | -2.174579               | 1.335061  | -0.549216 |
| 9             | 6             | 0           | -2.904454               | 0.247324  | -1.221433 |
| 10            | 1             | 0           | -2.211985               | -0.326868 | -1.843591 |
| 11            | 1             | 0           | -3.604756               | 0.720244  | -1.919309 |
| 12            | 6             | 0           | -3.629309               | -0.633773 | -0.296560 |
| 13            | 6             | 0           | -4.215452               | -1.361185 | 0.473390  |
| 14            | 6             | 0           | -4.925342               | -2.238515 | 1.401937  |



|    |   |   |           |           |           |
|----|---|---|-----------|-----------|-----------|
| 15 | 8 | 0 | 1.005126  | -2.649289 | -0.273581 |
| 16 | 8 | 0 | 2.465771  | 1.521904  | -1.068796 |
| 17 | 8 | 0 | 2.520473  | 1.084157  | 1.152273  |
| 18 | 6 | 0 | 3.485886  | 2.142552  | 1.330190  |
| 19 | 1 | 0 | 3.733414  | 2.133282  | 2.390876  |
| 20 | 1 | 0 | 3.047161  | 3.101983  | 1.046554  |
| 21 | 1 | 0 | 4.375365  | 1.951482  | 0.725610  |
| 22 | 8 | 0 | 3.013260  | -1.607507 | -0.238887 |
| 23 | 6 | 0 | 3.673486  | -2.889779 | -0.300905 |
| 24 | 1 | 0 | 4.739126  | -2.665953 | -0.303134 |
| 25 | 1 | 0 | 3.387367  | -3.416574 | -1.213841 |
| 26 | 1 | 0 | 3.407185  | -3.492098 | 0.570410  |
| 27 | 6 | 0 | -2.922213 | 2.568964  | -0.323961 |
| 28 | 1 | 0 | -3.135034 | 3.070946  | -1.275064 |
| 29 | 1 | 0 | -2.329297 | 3.228293  | 0.307061  |
| 30 | 1 | 0 | -3.870333 | 2.336822  | 0.172648  |
| 31 | 1 | 0 | -5.994681 | -2.000142 | 1.435374  |
| 32 | 1 | 0 | -4.528059 | -2.138785 | 2.418673  |
| 33 | 1 | 0 | -4.825056 | -3.289346 | 1.106589  |

-----  
SCF Done: E(RB3LYP) = -897.129599284 A.U. after 1 cycles  
Zero-point correction= 0.260397 (Hartree/Particle)  
Thermal correction to Energy= 0.281445  
Thermal correction to Enthalpy= 0.282389  
Thermal correction to Gibbs Free Energy= 0.206601  
Sum of electronic and zero-point Energies= -896.869203  
Sum of electronic and thermal Energies= -896.848155  
Sum of electronic and thermal Enthalpies= -896.847210  
Sum of electronic and thermal Free Energies= -896.922998  
SCF Done: E(RB3LYP) = -897.407712689 A.U. after 15 cycles

TS8 diEMeCCTS3pcm.log  
Standard orientation:

| Center<br>Number | Atomic<br>Number | Atomic<br>Type | Coordinates (Angstroms) |           |           |
|------------------|------------------|----------------|-------------------------|-----------|-----------|
|                  |                  |                | X                       | Y         | Z         |
| 1                | 6                | 0              | 0.768326                | 1.422591  | 0.082221  |
| 2                | 6                | 0              | 0.815834                | -0.042865 | -0.086931 |
| 3                | 6                | 0              | -0.424352               | -0.784540 | -0.244541 |
| 4                | 1                | 0              | -0.191168               | -1.748566 | -0.711972 |
| 5                | 6                | 0              | 2.034566                | -0.745275 | -0.535610 |
| 6                | 6                | 0              | -1.586149               | -0.151172 | -1.043426 |
| 7                | 8                | 0              | -1.425949               | 0.535966  | -2.044979 |
| 8                | 7                | 0              | -2.779982               | -0.559395 | -0.542877 |
| 9                | 6                | 0              | -2.719113               | -1.377333 | 0.659484  |
| 10               | 1                | 0              | -2.968288               | -2.425782 | 0.440196  |
| 11               | 1                | 0              | -3.420126               | -1.011670 | 1.417144  |
| 12               | 6                | 0              | -1.300175               | -1.229501 | 1.119468  |
| 13               | 6                | 0              | -0.605904               | -1.269083 | 2.182867  |
| 14               | 6                | 0              | 0.645329                | -0.910754 | 2.699329  |
| 15               | 8                | 0              | 2.040267                | -1.900521 | -0.950340 |
| 16               | 8                | 0              | 1.607745                | 2.243838  | -0.246697 |
| 17               | 8                | 0              | -0.393786               | 1.784328  | 0.696518  |
| 18               | 6                | 0              | -0.605292               | 3.197207  | 0.846811  |
| 19               | 1                | 0              | -1.571403               | 3.297027  | 1.341840  |
| 20               | 1                | 0              | -0.625447               | 3.689822  | -0.128960 |
| 21               | 1                | 0              | 0.183443                | 3.642556  | 1.458571  |
| 22               | 8                | 0              | 3.168817                | -0.027963 | -0.398136 |
| 23               | 6                | 0              | 4.377918                | -0.697168 | -0.793857 |
| 24               | 1                | 0              | 5.176061                | 0.026983  | -0.629452 |
| 25               | 1                | 0              | 4.336042                | -0.983339 | -1.847959 |
| 26               | 1                | 0              | 4.543596                | -1.590164 | -0.185351 |
| 27               | 6                | 0              | -4.049355               | -0.279326 | -1.187231 |
| 28               | 1                | 0              | -4.539696               | -1.210105 | -1.495799 |
| 29               | 1                | 0              | -3.852028               | 0.335139  | -2.066181 |
| 30               | 1                | 0              | -4.715891               | 0.260814  | -0.505501 |
| 31               | 1                | 0              | 0.656235                | -0.048188 | 3.372501  |
| 32               | 1                | 0              | 1.061848                | -0.485750 | 1.654412  |
| 33               | 1                | 0              | 1.300146                | -1.714886 | 3.044222  |

-----  
SCF Done: E(RB3LYP) = -897.090962350 A.U. after 1 cycles  
Zero-point correction= 0.258107 (Hartree/Particle)  
Thermal correction to Energy= 0.276814

Thermal correction to Enthalpy= 0.277759  
 Thermal correction to Gibbs Free Energy= 0.210830  
 Sum of electronic and zero-point Energies= -896.832855  
 Sum of electronic and thermal Energies= -896.814148  
 Sum of electronic and thermal Enthalpies= -896.813204  
 Sum of electronic and thermal Free Energies= -896.880132  
 SCF Done: E(RB3LYP) = -897.366117586 A.U. after 17 cycles

10M1 diEMeCCTS3pcm.rev.log  
 Standard orientation:

| Center Number | Atomic Number | Atomic Type | Coordinates (Angstroms) |           |           |
|---------------|---------------|-------------|-------------------------|-----------|-----------|
|               |               |             | X                       | Y         | Z         |
| 1             | 6             | 0           | 0.799462                | 0.958853  | 0.995675  |
| 2             | 6             | 0           | 0.878965                | -0.315979 | 0.148998  |
| 3             | 6             | 0           | -0.402263               | -0.597651 | -0.671028 |
| 4             | 1             | 0           | -0.078046               | -1.017582 | -1.633076 |
| 5             | 6             | 0           | 2.127099                | -0.255706 | -0.728470 |
| 6             | 6             | 0           | -1.231327               | 0.646238  | -1.025189 |
| 7             | 8             | 0           | -0.771828               | 1.733125  | -1.370588 |
| 8             | 7             | 0           | -2.546240               | 0.329681  | -0.915124 |
| 9             | 6             | 0           | -2.813943               | -1.014795 | -0.417017 |
| 10            | 1             | 0           | -3.278384               | -1.632378 | -1.199403 |
| 11            | 1             | 0           | -3.500459               | -0.983729 | 0.437273  |
| 12            | 6             | 0           | -1.429037               | -1.520711 | -0.030180 |
| 13            | 6             | 0           | -1.182379               | -2.552131 | 0.731920  |
| 14            | 6             | 0           | -0.922885               | -3.575509 | 1.504616  |
| 15            | 8             | 0           | 2.131796                | -0.059131 | -1.926285 |
| 16            | 8             | 0           | 1.626074                | 1.846277  | 1.006693  |
| 17            | 8             | 0           | -0.304494               | 0.943850  | 1.757105  |
| 18            | 6             | 0           | -0.514163               | 2.105410  | 2.589131  |
| 19            | 1             | 0           | -1.438770               | 1.910068  | 3.130602  |
| 20            | 1             | 0           | -0.612756               | 2.998807  | 1.968528  |
| 21            | 1             | 0           | 0.319945                | 2.229071  | 3.283082  |
| 22            | 8             | 0           | 3.227523                | -0.477217 | 0.002987  |
| 23            | 6             | 0           | 4.482945                | -0.408538 | -0.705219 |
| 24            | 1             | 0           | 5.248566                | -0.617736 | 0.040755  |
| 25            | 1             | 0           | 4.623078                | 0.588062  | -1.130080 |
| 26            | 1             | 0           | 4.509508                | -1.154295 | -1.502908 |
| 27            | 6             | 0           | -3.620070               | 1.238055  | -1.263969 |
| 28            | 1             | 0           | -4.240268               | 0.815172  | -2.063074 |
| 29            | 1             | 0           | -3.174443               | 2.173002  | -1.606672 |
| 30            | 1             | 0           | -4.257251               | 1.435968  | -0.393993 |
| 31            | 1             | 0           | -0.832348               | -3.468935 | 2.584862  |
| 32            | 1             | 0           | 1.020097                | -1.144821 | 0.853578  |
| 33            | 1             | 0           | -0.791792               | -4.578890 | 1.101481  |

SCF Done: E(RB3LYP) = -897.160564856 A.U. after 1 cycles  
 Zero-point correction= 0.262464 (Hartree/Particle)  
 Thermal correction to Energy= 0.281763  
 Thermal correction to Enthalpy= 0.282707  
 Thermal correction to Gibbs Free Energy= 0.213417  
 Sum of electronic and zero-point Energies= -896.898101  
 Sum of electronic and thermal Energies= -896.878802  
 Sum of electronic and thermal Enthalpies= -896.877858  
 Sum of electronic and thermal Free Energies= -896.947148  
 SCF Done: E(RB3LYP) = -897.435421604 A.U. after 15 cycles

6M3+H2O diEMeCCwTSlpcm.for4.log  
 Standard orientation:

| Center Number | Atomic Number | Atomic Type | Coordinates (Angstroms) |           |           |
|---------------|---------------|-------------|-------------------------|-----------|-----------|
|               |               |             | X                       | Y         | Z         |
| 1             | 6             | 0           | -2.452853               | -0.870375 | -0.437682 |
| 2             | 6             | 0           | -1.559730               | 0.290190  | -0.079836 |
| 3             | 6             | 0           | -0.231979               | 0.191128  | 0.084466  |
| 4             | 1             | 0           | 0.316698                | 1.106637  | 0.280384  |
| 5             | 6             | 0           | -2.191767               | 1.643519  | 0.046810  |
| 6             | 6             | 0           | 0.501169                | -1.103852 | -0.072568 |
| 7             | 8             | 0           | 0.000744                | -2.026860 | -0.726554 |

|    |   |   |           |           |           |
|----|---|---|-----------|-----------|-----------|
| 8  | 7 | 0 | 1.734672  | -1.191140 | 0.502858  |
| 9  | 6 | 0 | 2.298736  | -0.161202 | 1.387964  |
| 10 | 1 | 0 | 2.921406  | -0.678415 | 2.126509  |
| 11 | 1 | 0 | 1.495896  | 0.313293  | 1.959387  |
| 12 | 6 | 0 | 3.093438  | 0.858075  | 0.685402  |
| 13 | 6 | 0 | 3.722832  | 1.723879  | 0.116546  |
| 14 | 6 | 0 | 4.496563  | 2.755272  | -0.573495 |
| 15 | 8 | 0 | -1.573293 | 2.678878  | 0.204345  |
| 16 | 8 | 0 | -2.942536 | -1.016062 | -1.538028 |
| 17 | 8 | 0 | -2.681594 | -1.660504 | 0.617726  |
| 18 | 6 | 0 | -3.510984 | -2.815046 | 0.365698  |
| 19 | 1 | 0 | -3.615385 | -3.312477 | 1.329059  |
| 20 | 1 | 0 | -3.022704 | -3.473950 | -0.356167 |
| 21 | 1 | 0 | -4.486567 | -2.507637 | -0.017265 |
| 22 | 8 | 0 | -3.528724 | 1.563552  | -0.013453 |
| 23 | 6 | 0 | -4.245497 | 2.810298  | 0.111300  |
| 24 | 1 | 0 | -5.299340 | 2.545721  | 0.039539  |
| 25 | 1 | 0 | -3.962134 | 3.489186  | -0.695961 |
| 26 | 1 | 0 | -4.028359 | 3.274702  | 1.075733  |
| 27 | 6 | 0 | 2.565263  | -2.371027 | 0.265726  |
| 28 | 1 | 0 | 3.557729  | -2.062639 | -0.080302 |
| 29 | 1 | 0 | 2.086518  | -2.985111 | -0.494817 |
| 30 | 1 | 0 | 2.672927  | -2.955382 | 1.187260  |
| 31 | 8 | 0 | 5.609067  | -0.791547 | -0.849588 |
| 32 | 1 | 0 | 6.181962  | -0.997589 | -0.094050 |
| 33 | 1 | 0 | 4.943012  | -0.194171 | -0.465190 |
| 34 | 1 | 0 | 5.386366  | 2.322106  | -1.043995 |
| 35 | 1 | 0 | 4.827981  | 3.529509  | 0.127490  |
| 36 | 1 | 0 | 3.900822  | 3.239393  | -1.355180 |

-----  
SCF Done: E(RB3LYP) = -973.552445311 A.U. after 1 cycles  
Zero-point correction= 0.284090 (Hartree/Particle)  
Thermal correction to Energy= 0.308762  
Thermal correction to Enthalpy= 0.309706  
Thermal correction to Gibbs Free Energy= 0.224047  
Sum of electronic and zero-point Energies= -973.268355  
Sum of electronic and thermal Energies= -973.243683  
Sum of electronic and thermal Enthalpies= -973.242739  
Sum of electronic and thermal Free Energies= -973.328398  
SCF Done: E(RB3LYP) = -973.875542430 A.U. after 15 cycles

TS9 diEMeCCwTS1pcm.log  
Standard orientation:

| Center<br>Number | Atomic<br>Number | Atomic<br>Type | Coordinates (Angstroms) |           |           |
|------------------|------------------|----------------|-------------------------|-----------|-----------|
|                  |                  |                | X                       | Y         | Z         |
| 1                | 6                | 0              | -1.027531               | -1.374938 | 0.847791  |
| 2                | 6                | 0              | -1.078212               | -0.374758 | -0.197637 |
| 3                | 6                | 0              | 0.110171                | 0.059410  | -0.905473 |
| 4                | 1                | 0              | -0.179312               | 0.647555  | -1.776152 |
| 5                | 6                | 0              | -2.280848               | 0.363932  | -0.537262 |
| 6                | 6                | 0              | 1.124388                | -1.018090 | -1.342017 |
| 7                | 8                | 0              | 0.814401                | -1.926331 | -2.104857 |
| 8                | 7                | 0              | 2.361240                | -0.789900 | -0.839985 |
| 9                | 6                | 0              | 2.459426                | 0.288333  | 0.121805  |
| 10               | 1                | 0              | 3.337668                | 0.910388  | -0.074654 |
| 11               | 1                | 0              | 2.523841                | -0.097762 | 1.148173  |
| 12               | 6                | 0              | 1.197385                | 1.087599  | -0.060004 |
| 13               | 6                | 0              | 0.842448                | 2.274673  | 0.167958  |
| 14               | 6                | 0              | 0.052588                | 3.475359  | 0.303934  |
| 15               | 8                | 0              | -2.297553               | 1.335529  | -1.304053 |
| 16               | 8                | 0              | -1.955889               | -1.914977 | 1.440646  |
| 17               | 8                | 0              | 0.277663                | -1.699724 | 1.157540  |
| 18               | 6                | 0              | 0.443455                | -2.734294 | 2.133512  |
| 19               | 1                | 0              | 1.520650                | -2.873810 | 2.235254  |
| 20               | 1                | 0              | -0.026999               | -3.664915 | 1.803102  |
| 21               | 1                | 0              | 0.009814                | -2.440081 | 3.093577  |
| 22               | 8                | 0              | -3.424081               | -0.075700 | 0.049114  |
| 23               | 6                | 0              | -4.605264               | 0.672323  | -0.268463 |
| 24               | 1                | 0              | -5.412560               | 0.187884  | 0.282732  |
| 25               | 1                | 0              | -4.812301               | 0.644480  | -1.342012 |
| 26               | 1                | 0              | -4.506848               | 1.715434  | 0.046139  |
| 27               | 6                | 0              | 3.469933                | -1.702751 | -1.040722 |

|    |   |   |           |           |           |
|----|---|---|-----------|-----------|-----------|
| 28 | 1 | 0 | 4.358721  | -1.156874 | -1.374727 |
| 29 | 1 | 0 | 3.175854  | -2.423877 | -1.804327 |
| 30 | 1 | 0 | 3.710409  | -2.235686 | -0.112221 |
| 31 | 8 | 0 | 2.762886  | 3.358546  | 1.344264  |
| 32 | 1 | 0 | 3.136635  | 2.792721  | 2.039334  |
| 33 | 1 | 0 | 3.497534  | 3.485565  | 0.722144  |
| 34 | 1 | 0 | -0.068650 | 3.755925  | 1.354618  |
| 35 | 1 | 0 | -0.940500 | 3.247538  | -0.110747 |
| 36 | 1 | 0 | 0.480329  | 4.315290  | -0.252099 |

-----  
SCF Done: E(RB3LYP) = -973.516254529 A.U. after 1 cycles  
Zero-point correction= 0.283196 (Hartree/Particle)  
Thermal correction to Energy= 0.306078  
Thermal correction to Enthalpy= 0.307022  
Thermal correction to Gibbs Free Energy= 0.230093  
Sum of electronic and zero-point Energies= -973.233059  
Sum of electronic and thermal Energies= -973.210176  
Sum of electronic and thermal Enthalpies= -973.209232  
Sum of electronic and thermal Free Energies= -973.286162  
SCF Done: E(RB3LYP) = -973.836794254 A.U. after 17 cycles

CM5 diEMeCCwTS1pcm.rev.log  
Standard orientation:

| Center<br>Number | Atomic<br>Number | Atomic<br>Type | Coordinates (Angstroms) |           |           |
|------------------|------------------|----------------|-------------------------|-----------|-----------|
|                  |                  |                | X                       | Y         | Z         |
| 1                | 6                | 0              | -0.819412               | -1.104510 | 1.088333  |
| 2                | 6                | 0              | -0.976248               | -0.333882 | -0.102857 |
| 3                | 6                | 0              | 0.239910                | 0.165298  | -0.853000 |
| 4                | 1                | 0              | -0.149760               | 0.657999  | -1.752282 |
| 5                | 6                | 0              | -2.233421               | 0.053267  | -0.657689 |
| 6                | 6                | 0              | 1.206710                | -0.931837 | -1.331661 |
| 7                | 8                | 0              | 0.896122                | -1.927881 | -1.978295 |
| 8                | 7                | 0              | 2.478503                | -0.598799 | -0.967423 |
| 9                | 6                | 0              | 2.578174                | 0.568137  | -0.112011 |
| 10               | 1                | 0              | 3.320419                | 1.276332  | -0.505676 |
| 11               | 1                | 0              | 2.892843                | 0.280770  | 0.903079  |
| 12               | 6                | 0              | 1.172448                | 1.133533  | -0.126874 |
| 13               | 6                | 0              | 0.778144                | 2.298886  | 0.361269  |
| 14               | 6                | 0              | -0.506926               | 3.036741  | 0.379854  |
| 15               | 8                | 0              | -2.379907               | 0.818944  | -1.631308 |
| 16               | 8                | 0              | -1.664586               | -1.602337 | 1.836769  |
| 17               | 8                | 0              | 0.536422                | -1.266604 | 1.395875  |
| 18               | 6                | 0              | 0.810921                | -2.034919 | 2.565592  |
| 19               | 1                | 0              | 1.899219                | -2.075985 | 2.647611  |
| 20               | 1                | 0              | 0.406699                | -3.048922 | 2.482165  |
| 21               | 1                | 0              | 0.388813                | -1.566326 | 3.460762  |
| 22               | 8                | 0              | -3.344967               | -0.471173 | -0.041759 |
| 23               | 6                | 0              | -4.598183               | -0.041550 | -0.575728 |
| 24               | 1                | 0              | -5.359685               | -0.550007 | 0.019674  |
| 25               | 1                | 0              | -4.703640               | -0.318785 | -1.629322 |
| 26               | 1                | 0              | -4.722083               | 1.042946  | -0.487727 |
| 27               | 6                | 0              | 3.629077                | -1.440176 | -1.219763 |
| 28               | 1                | 0              | 4.425864                | -0.870303 | -1.711630 |
| 29               | 1                | 0              | 3.309316                | -2.254603 | -1.871525 |
| 30               | 1                | 0              | 4.024452                | -1.859130 | -0.285184 |
| 31               | 8                | 0              | 1.827227                | 3.116235  | 1.115439  |
| 32               | 1                | 0              | 2.359650                | 2.608397  | 1.764870  |
| 33               | 1                | 0              | 2.426071                | 3.644173  | 0.542603  |
| 34               | 1                | 0              | -0.913800               | 3.113817  | 1.394886  |
| 35               | 1                | 0              | -1.223054               | 2.507056  | -0.253668 |
| 36               | 1                | 0              | -0.380504               | 4.052768  | -0.013247 |

-----  
SCF Done: E(RB3LYP) = -973.534632959 A.U. after 1 cycles  
Zero-point correction= 0.288848 (Hartree/Particle)  
Thermal correction to Energy= 0.309997  
Thermal correction to Enthalpy= 0.310941  
Thermal correction to Gibbs Free Energy= 0.239102  
Sum of electronic and zero-point Energies= -973.245785  
Sum of electronic and thermal Energies= -973.224636  
Sum of electronic and thermal Enthalpies= -973.223692  
Sum of electronic and thermal Free Energies= -973.295531  
SCF Done: E(RB3LYP) = -973.851534617 A.U. after 16 cycles

3M3

MeCCTS4pcm.for3.log

Standard orientation:

| Center<br>Number | Atomic<br>Number | Atomic<br>Type | Coordinates (Angstroms) |           |           |
|------------------|------------------|----------------|-------------------------|-----------|-----------|
|                  |                  |                | X                       | Y         | Z         |
| 1                | 1                | 0              | 2.062895                | -1.652637 | -0.528691 |
| 2                | 6                | 0              | 1.728565                | -0.689271 | -0.158793 |
| 3                | 6                | 0              | 0.431567                | -0.452645 | 0.071636  |
| 4                | 1                | 0              | 0.131455                | 0.528039  | 0.424752  |
| 5                | 6                | 0              | 2.750584                | 0.359372  | 0.077981  |
| 6                | 6                | 0              | -0.592082               | -1.509820 | -0.208135 |
| 7                | 8                | 0              | -0.300548               | -2.501762 | -0.886586 |
| 8                | 7                | 0              | -1.846329               | -1.314057 | 0.299224  |
| 9                | 6                | 0              | -2.215740               | -0.207147 | 1.195278  |
| 10               | 1                | 0              | -1.373204               | 0.031199  | 1.850249  |
| 11               | 1                | 0              | -3.004555               | -0.583654 | 1.856721  |
| 12               | 6                | 0              | -2.682392               | 0.993675  | 0.488671  |
| 13               | 6                | 0              | -3.058502               | 1.982340  | -0.100115 |
| 14               | 6                | 0              | -3.512476               | 3.175755  | -0.811378 |
| 15               | 8                | 0              | 2.527824                | 1.487260  | 0.483301  |
| 16               | 8                | 0              | 3.980522                | -0.101453 | -0.218102 |
| 17               | 6                | 0              | 5.063564                | 0.829936  | -0.029632 |
| 18               | 1                | 0              | 5.965644                | 0.289625  | -0.314241 |
| 19               | 1                | 0              | 5.117563                | 1.143675  | 1.015675  |
| 20               | 1                | 0              | 4.924944                | 1.707654  | -0.665545 |
| 21               | 6                | 0              | -2.924611               | -2.226610 | -0.068582 |
| 22               | 1                | 0              | -3.250477               | -2.811772 | 0.799712  |
| 23               | 1                | 0              | -2.563033               | -2.901270 | -0.842198 |
| 24               | 1                | 0              | -3.778325               | -1.654060 | -0.447278 |
| 25               | 1                | 0              | -4.598741               | 3.298204  | -0.730581 |
| 26               | 1                | 0              | -3.260827               | 3.117949  | -1.876745 |
| 27               | 1                | 0              | -3.042288               | 4.079585  | -0.406888 |

SCF Done: E(RB3LYP) = -669.259870858 A.U. after 1 cycles  
 Zero-point correction= 0.217701 (Hartree/Particle)  
 Thermal correction to Energy= 0.234207  
 Thermal correction to Enthalpy= 0.235151  
 Thermal correction to Gibbs Free Energy= 0.169710  
 Sum of electronic and zero-point Energies= -669.042170  
 Sum of electronic and thermal Energies= -669.025664  
 Sum of electronic and thermal Enthalpies= -669.024719  
 Sum of electronic and thermal Free Energies= -669.090161  
 SCF Done: E(RB3LYP) = -669.467444376 A.U. after 15 cycles

TS10

MeCCTS4pcm.log

Standard orientation:

| Center<br>Number | Atomic<br>Number | Atomic<br>Type | Coordinates (Angstroms) |           |           |
|------------------|------------------|----------------|-------------------------|-----------|-----------|
|                  |                  |                | X                       | Y         | Z         |
| 1                | 1                | 0              | 0.877635                | -0.518471 | -1.531520 |
| 2                | 6                | 0              | 0.881230                | -0.213822 | -0.489512 |
| 3                | 6                | 0              | -0.334520               | -0.145492 | 0.235645  |
| 4                | 1                | 0              | -0.170659               | -0.228552 | 1.315242  |
| 5                | 6                | 0              | 2.140849                | -0.345942 | 0.242913  |
| 6                | 6                | 0              | -1.531272               | -1.002560 | -0.196398 |
| 7                | 8                | 0              | -1.421775               | -2.123573 | -0.685804 |
| 8                | 7                | 0              | -2.708920               | -0.396167 | 0.111326  |
| 9                | 6                | 0              | -2.622370               | 0.975249  | 0.602674  |
| 10               | 1                | 0              | -2.788511               | 1.017671  | 1.689413  |
| 11               | 1                | 0              | -3.382409               | 1.598957  | 0.120116  |
| 12               | 6                | 0              | -1.250610               | 1.420966  | 0.227822  |
| 13               | 6                | 0              | -0.547080               | 2.387880  | -0.177043 |
| 14               | 6                | 0              | 0.723085                | 2.645375  | -0.726669 |
| 15               | 8                | 0              | 2.290914                | -0.189139 | 1.449325  |
| 16               | 8                | 0              | 3.167291                | -0.662772 | -0.588384 |
| 17               | 6                | 0              | 4.453907                | -0.800703 | 0.034826  |
| 18               | 1                | 0              | 5.145161                | -1.047999 | -0.771194 |
| 19               | 1                | 0              | 4.439903                | -1.600502 | 0.780189  |

|    |   |   |           |           |           |
|----|---|---|-----------|-----------|-----------|
| 20 | 1 | 0 | 4.753086  | 0.133629  | 0.517667  |
| 21 | 6 | 0 | -3.995666 | -1.054760 | -0.009675 |
| 22 | 1 | 0 | -4.494288 | -1.108830 | 0.965372  |
| 23 | 1 | 0 | -3.824952 | -2.063642 | -0.386257 |
| 24 | 1 | 0 | -4.644792 | -0.510728 | -0.705713 |
| 25 | 1 | 0 | 0.731879  | 2.983855  | -1.767149 |
| 26 | 1 | 0 | 1.102058  | 1.502058  | -0.760395 |
| 27 | 1 | 0 | 1.421567  | 3.222448  | -0.113651 |

-----  
SCF Done: E(RB3LYP) = -669.212022664 A.U. after 1 cycles  
Zero-point correction= 0.215009 (Hartree/Particle)  
Thermal correction to Energy= 0.229331  
Thermal correction to Enthalpy= 0.230275  
Thermal correction to Gibbs Free Energy= 0.173360  
Sum of electronic and zero-point Energies= -668.997013  
Sum of electronic and thermal Energies= -668.982692  
Sum of electronic and thermal Enthalpies= -668.981748  
Sum of electronic and thermal Free Energies= -669.038662  
SCF Done: E(RB3LYP) = -669.417976978 A.U. after 15 cycles

10M2 MeCCTS4pcm.rev.log  
Standard orientation:

| Center<br>Number | Atomic<br>Number | Atomic<br>Type | Coordinates (Angstroms) |           |           |
|------------------|------------------|----------------|-------------------------|-----------|-----------|
|                  |                  |                | X                       | Y         | Z         |
| 1                | 1                | 0              | 0.576626                | -2.043478 | -0.438262 |
| 2                | 6                | 0              | 0.703477                | -0.952518 | -0.431050 |
| 3                | 6                | 0              | -0.448847               | -0.346996 | 0.371278  |
| 4                | 1                | 0              | -0.248269               | -0.536663 | 1.436229  |
| 5                | 6                | 0              | 2.060515                | -0.663749 | 0.179108  |
| 6                | 6                | 0              | -1.794388               | -1.013956 | 0.053936  |
| 7                | 8                | 0              | -1.975736               | -2.224571 | -0.064845 |
| 8                | 7                | 0              | -2.744102               | -0.047624 | -0.047658 |
| 9                | 6                | 0              | -2.251709               | 1.313752  | 0.129885  |
| 10               | 1                | 0              | -2.633972               | 1.742656  | 1.068166  |
| 11               | 1                | 0              | -2.582166               | 1.959581  | -0.692123 |
| 12               | 6                | 0              | -0.737723               | 1.130828  | 0.152491  |
| 13               | 6                | 0              | 0.138493                | 2.081487  | -0.035005 |
| 14               | 6                | 0              | 1.015903                | 3.033345  | -0.222782 |
| 15               | 8                | 0              | 2.268543                | -0.465698 | 1.361173  |
| 16               | 8                | 0              | 3.029639                | -0.696276 | -0.752094 |
| 17               | 6                | 0              | 4.374287                | -0.496073 | -0.270932 |
| 18               | 1                | 0              | 5.011829                | -0.563327 | -1.151789 |
| 19               | 1                | 0              | 4.639536                | -1.269119 | 0.454105  |
| 20               | 1                | 0              | 4.467841                | 0.487561  | 0.195396  |
| 21               | 6                | 0              | -4.152284               | -0.324525 | -0.246378 |
| 22               | 1                | 0              | -4.741611               | 0.021875  | 0.611348  |
| 23               | 1                | 0              | -4.272469               | -1.403219 | -0.356437 |
| 24               | 1                | 0              | -4.519976               | 0.177643  | -1.148775 |
| 25               | 1                | 0              | 1.378893                | 3.291567  | -1.216949 |
| 26               | 1                | 0              | 0.687618                | -0.620255 | -1.472371 |
| 27               | 1                | 0              | 1.418917                | 3.611339  | 0.607880  |

-----  
SCF Done: E(RB3LYP) = -669.293527296 A.U. after 1 cycles  
Zero-point correction= 0.219586 (Hartree/Particle)  
Thermal correction to Energy= 0.234388  
Thermal correction to Enthalpy= 0.235332  
Thermal correction to Gibbs Free Energy= 0.176317  
Sum of electronic and zero-point Energies= -669.073941  
Sum of electronic and thermal Energies= -669.059139  
Sum of electronic and thermal Enthalpies= -669.058195  
Sum of electronic and thermal Free Energies= -669.117210  
SCF Done: E(RB3LYP) = -669.498225314 A.U. after 14 cycles
